# Supplementary material
Source: PubMed Central journal article supplement (PMC7042494)
Supplement: mmc1.pdf [file mmc1.pdf]

## Supplemental Data

### **Allelic Heterogeneity at the *CRP* Locus Identified by Whole-Genome Sequencing in Multi-ancestry Cohorts**

**Laura M. Raffield, Apoorva K. Iyengar, Biqi Wang, Sheila M. Gaynor, Cassandra N. Spracklen, Xue Zhong, Madeline H. Kowalski, Shabnam Salimi, Linda M. Polfus, Emelia J. Benjamin, Joshua C. Bis, Russell Bowler, Brian E. Cade, Won Jung Choi, Alejandro P. Comellas, Adolfo Correa, Pedro Cruz, Harsha Doddapaneni, Peter Durda, Stephanie M. Gogarten, Deepti Jain, Ryan W. Kim, Brian G. Kral, Leslie A. Lange, Martin G. Larson, Cecelia Laurie, Jiwon Lee, Seonwook Lee, Joshua P. Lewis, Ginger A. Metcalf, Braxton D. Mitchell, Zeineen Momin, Donna M. Muzny, Nathan Pankratz, Cheol Joo Park, Stephen S. Rich, Jerome I. Rotter, Kathleen Ryan, Daekwan Seo, Russell P. Tracy, Karine A. Viaud-Martinez, Lisa R. Yanek, Lue Ping Zhao, Xihong Lin, Bingshan Li, Yun Li, Josée Dupuis, Alexander P. Reiner, Karen L. Mohlke, Paul L. Auer, TOPMed Inflammation Working Group, and NHLBI Trans-Omics for Precision Medicine (TOPMed) Consortium**

Figure S1a: QQ-plot of association analysis for C-reactive protein in TOPMed.

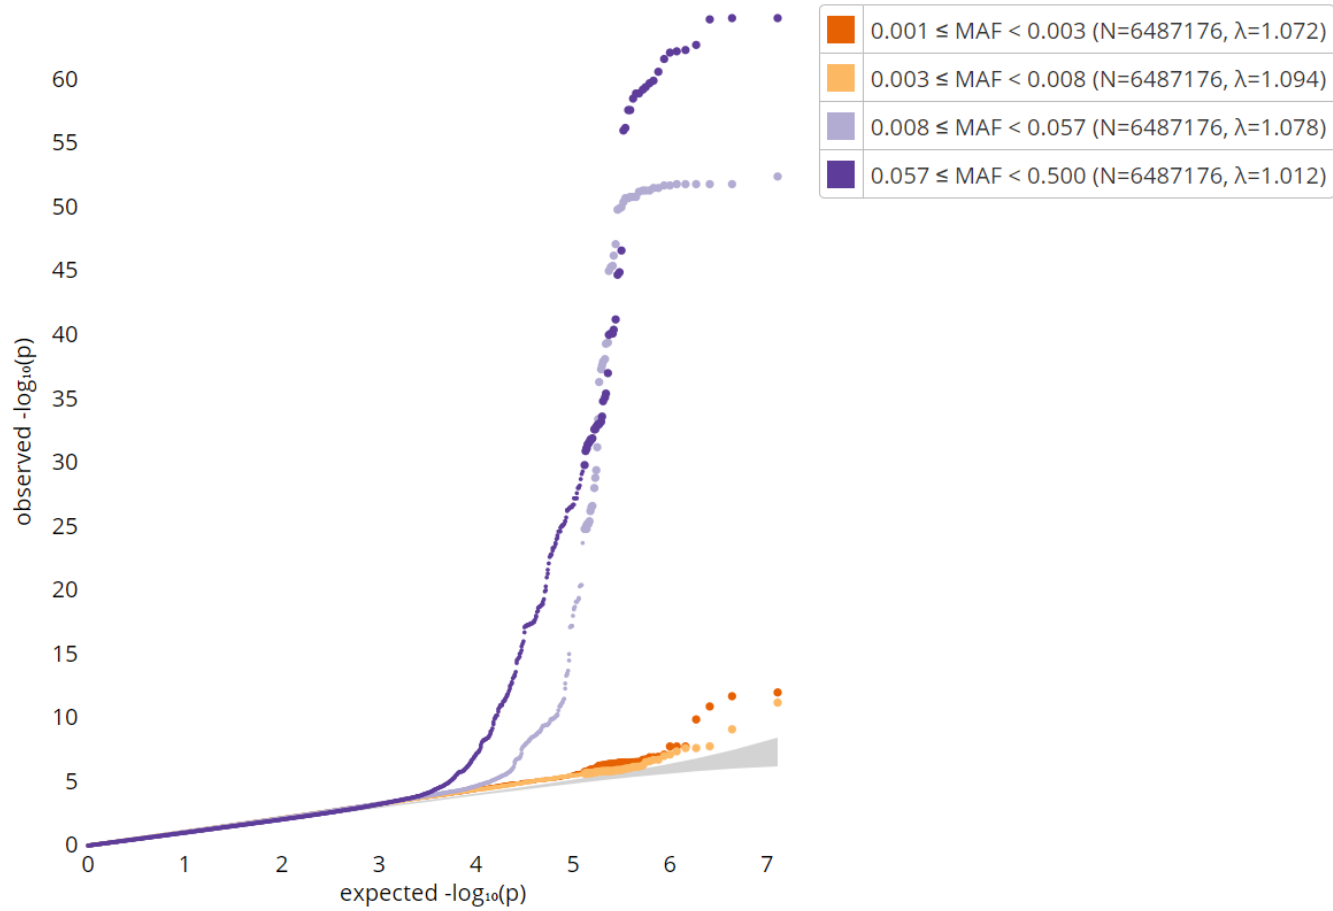

Observed versus expected  $-\log_{10}$  p-values for all variants included in the pooled ancestry C-reactive protein analysis on ENCORE, stratified by minor allele frequency (MAF) bin, with genomic inflation  $\lambda$  for each bin.

Figure S1b: Manhattan plot of CRP association signals in TOPMed.

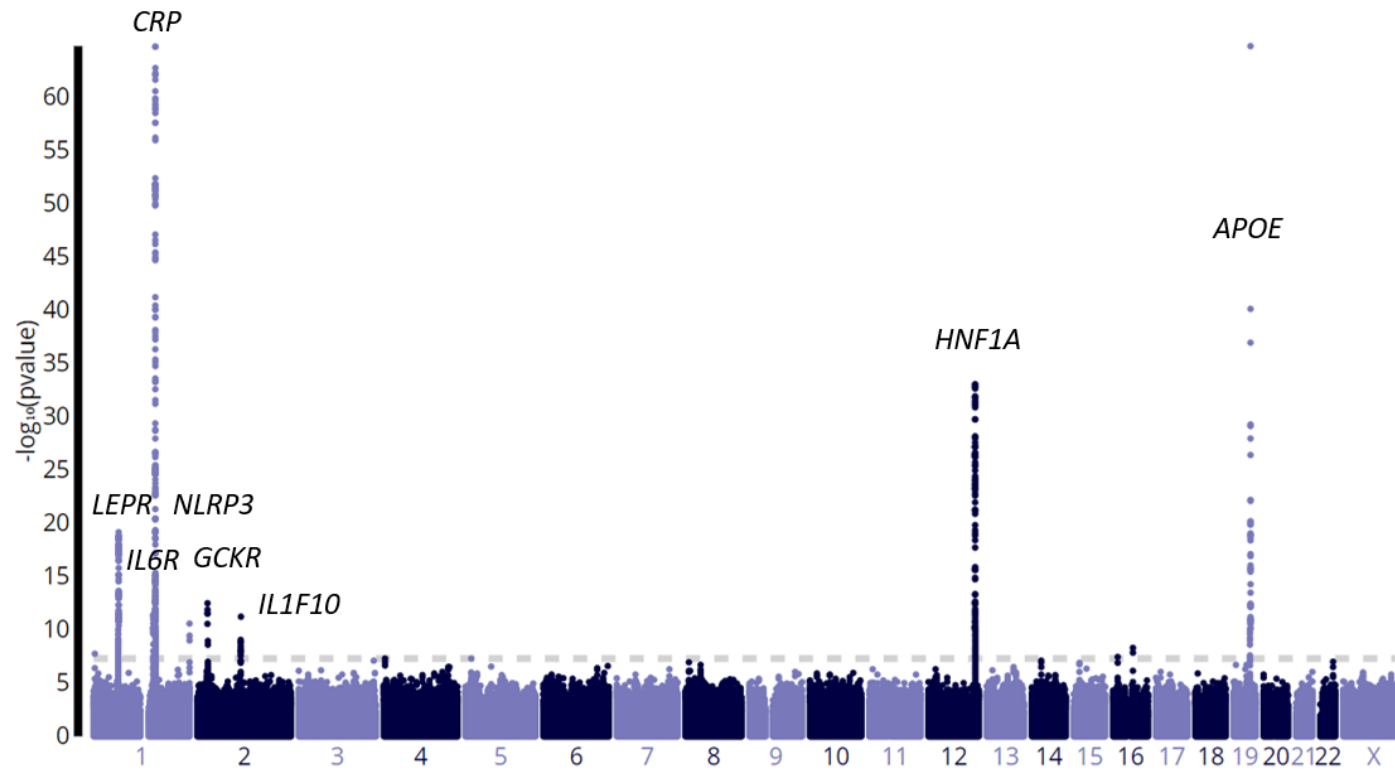

Y axis displays  $-\log_{10}$  p-values for all variants included in the pooled ancestry C-reactive protein analysis on ENCORE, with the x axis displaying chromosomal position.

**Figure S2: LocusZoom plots for sequential conditional analysis results at *CRP* locus, as well as plot of *CRP* locus adjusting for all previously identified *CRP* locus variants. For each plot, linkage disequilibrium is calculated using the same TOPMed samples included in our ancestry pooled C-reactive protein analyses.**

- a. In ancestry pooled analysis, LocusZoom plot of association results conditioned on rs7551731 (lead variant rs73024795). Letters in this and subsequent figures correspond to the list of conditionally distinct signals in Table 2. All plots display  $-\log_{10}(\text{p-value})$  versus genomic location for all distinct signals subsequent to ones conditioned on, using order from Table. The lead variant for each conditionally distinct signal is indicated with a diamond, with other variants in linkage disequilibrium  $r^2 > 0.2$  indicated in the colors used for each letter label and displayed on the legend at right, each with a different shape (for example, variants in close linkage disequilibrium with signal B (rs73024795) are displayed as pink triangles).

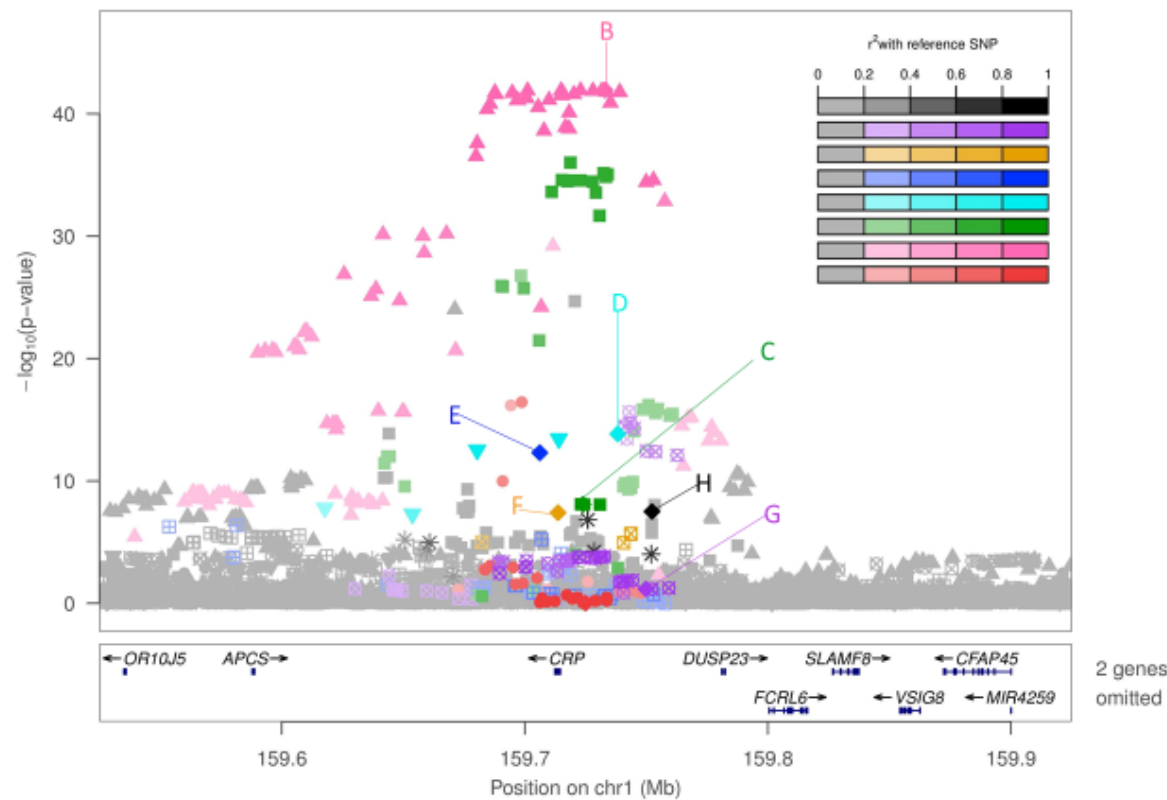

b. In ancestry pooled analysis, LocusZoom plot of association results conditioned on rs7551731 and rs73024795 (lead variant rs2211321).

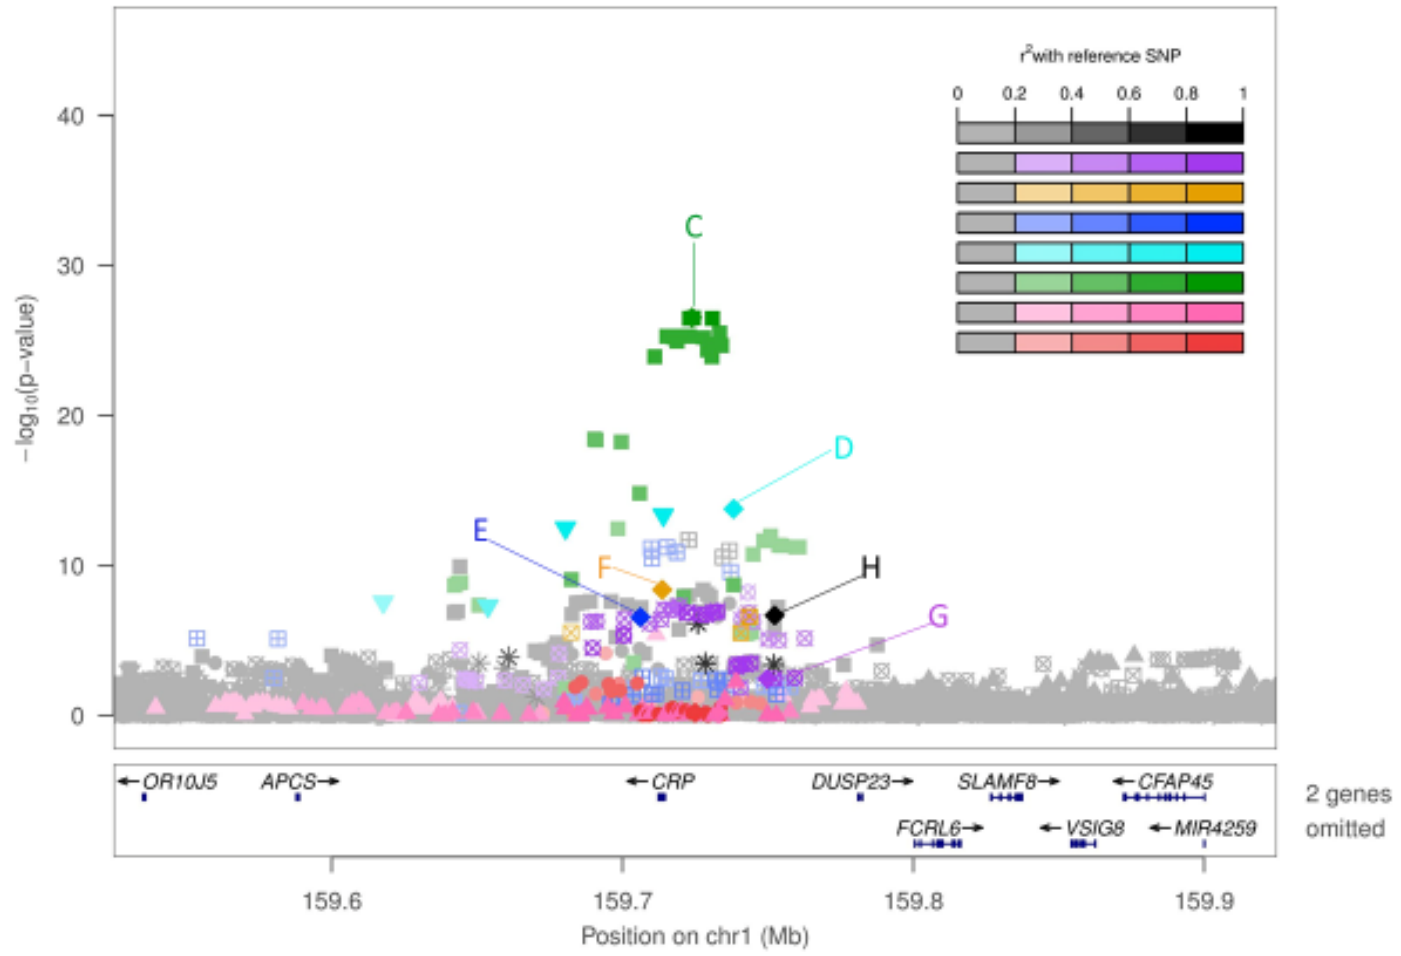

c. In ancestry pooled analysis, LocusZoom plot of association results conditioned on rs7551731, rs73024795, and rs2211321 (lead variant rs553202904).

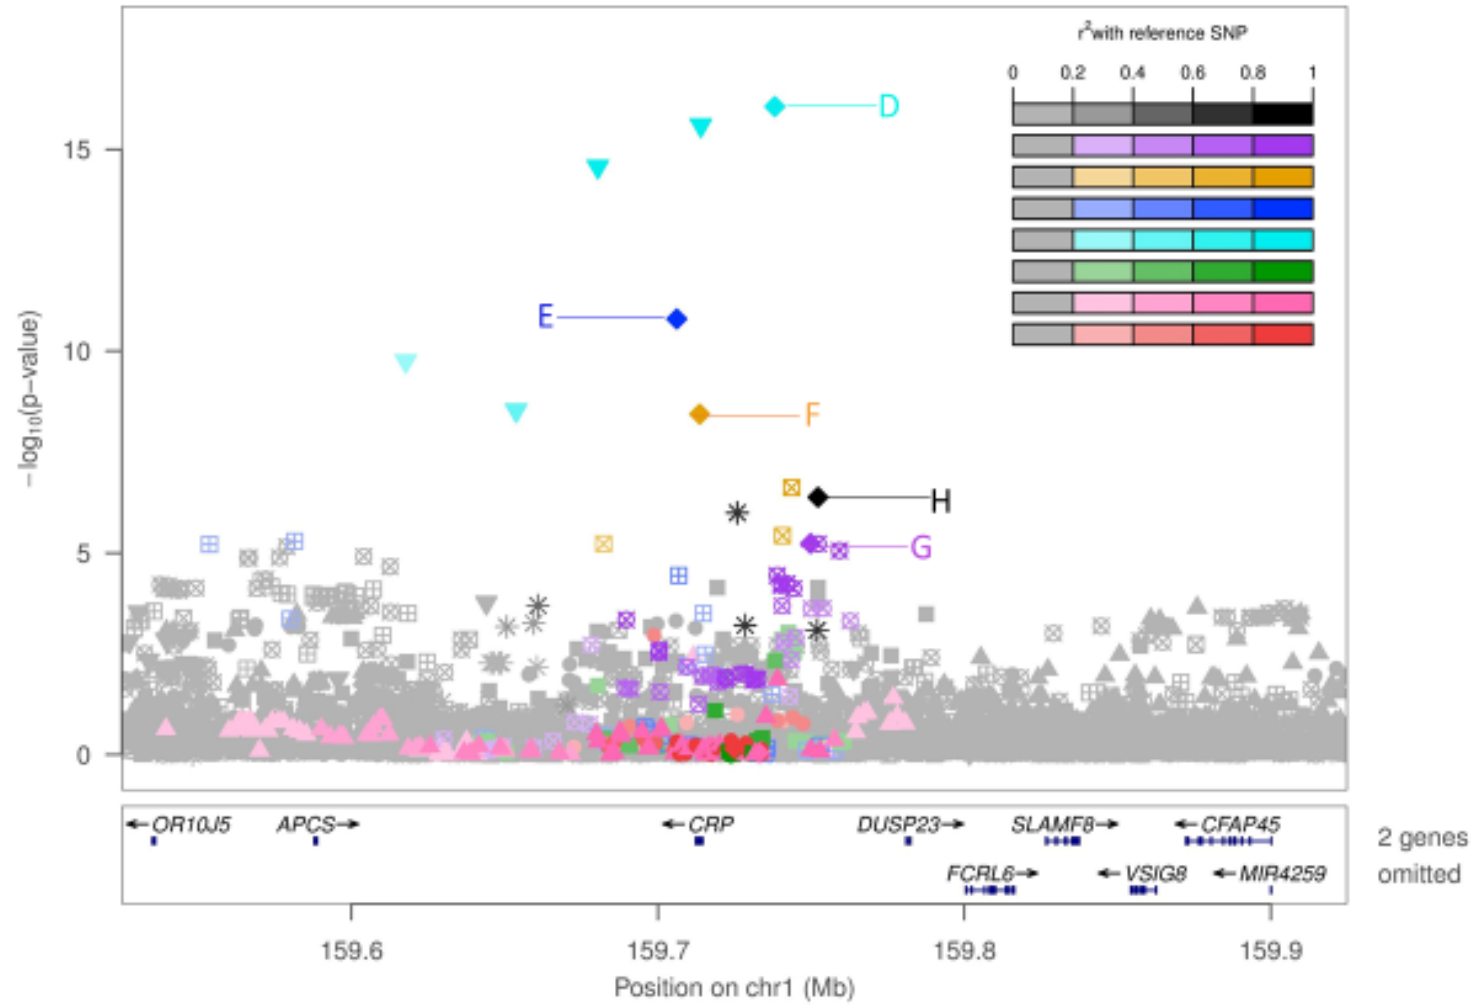

d. In ancestry pooled analysis, LocusZoom plot of association results conditioned on rs7551731, rs73024795, rs2211321, and rs553202904 (lead variant rs11265259).

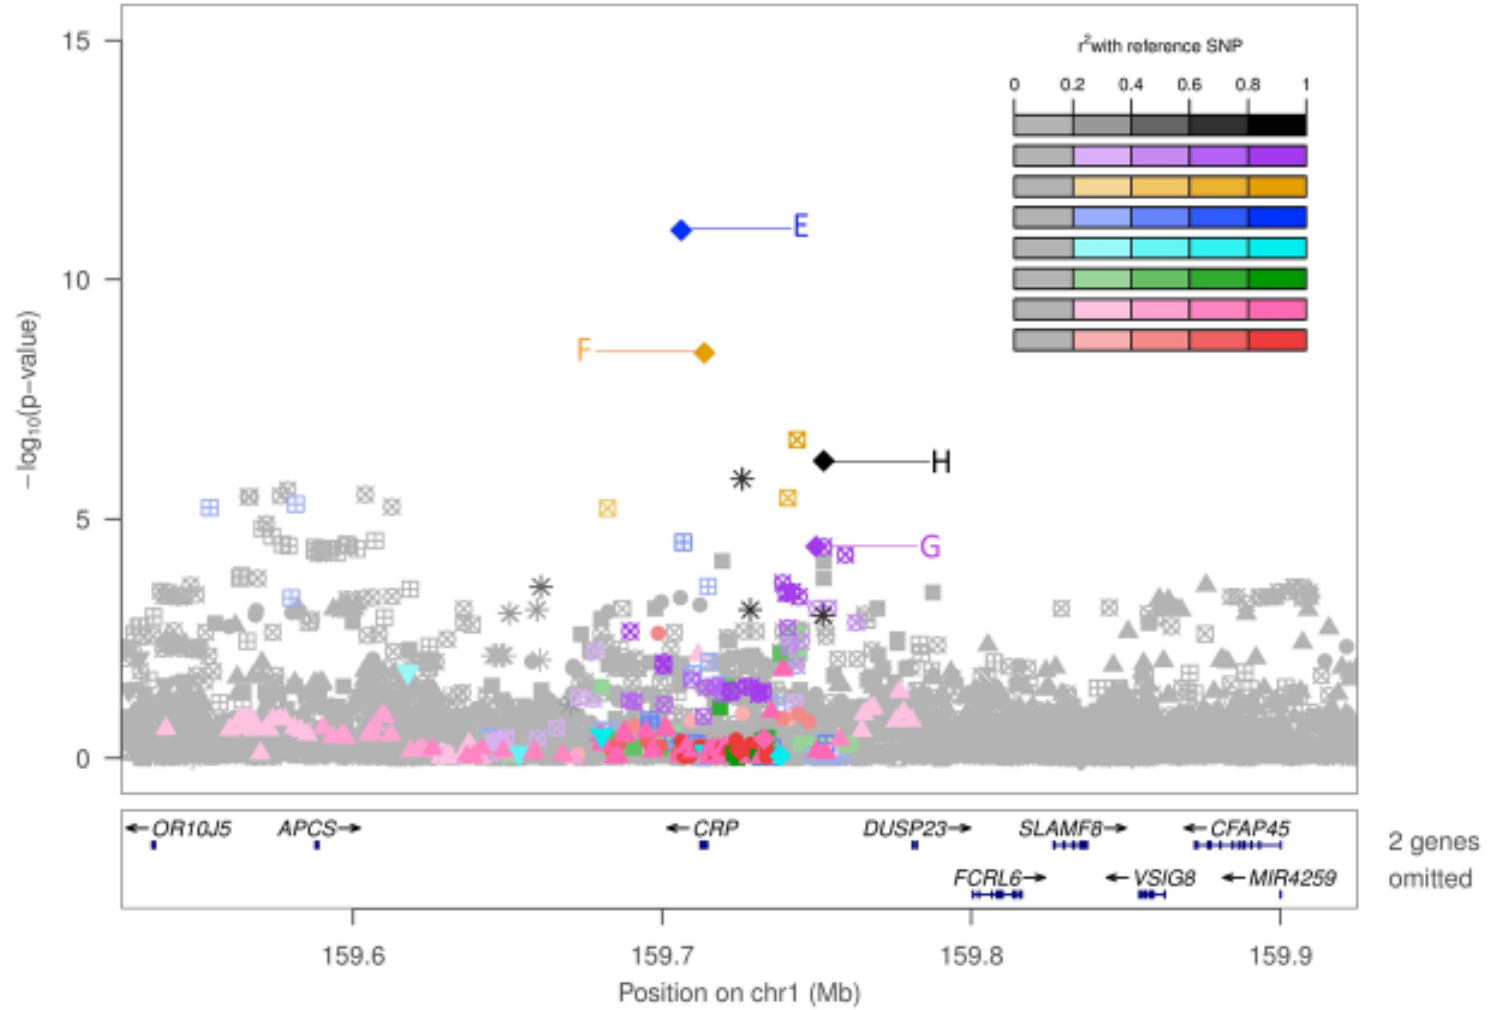

e. In ancestry pooled analysis, LocusZoom plot of association results conditioned on rs7551731, rs73024795, rs2211321, rs553202904, and rs11265259 (lead variant rs1800947).

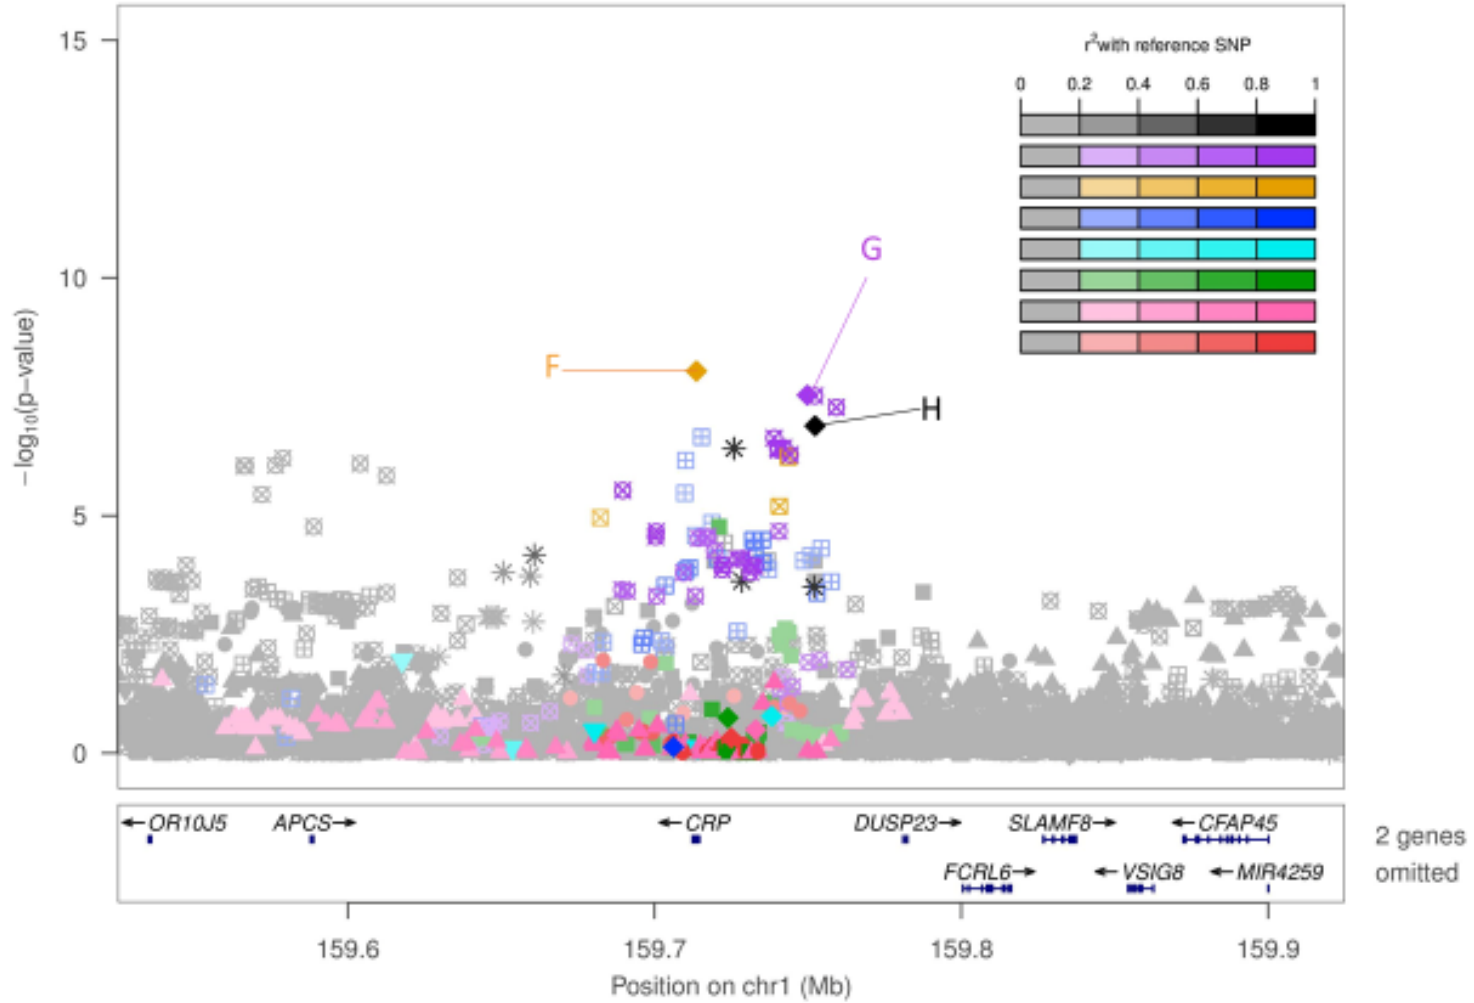



- f. In ancestry pooled analysis, LocusZoom plot of association results conditioned on rs7551731, rs73024795, rs2211321, rs553202904, rs11265259, and rs1800947 (lead variant rs12734907).

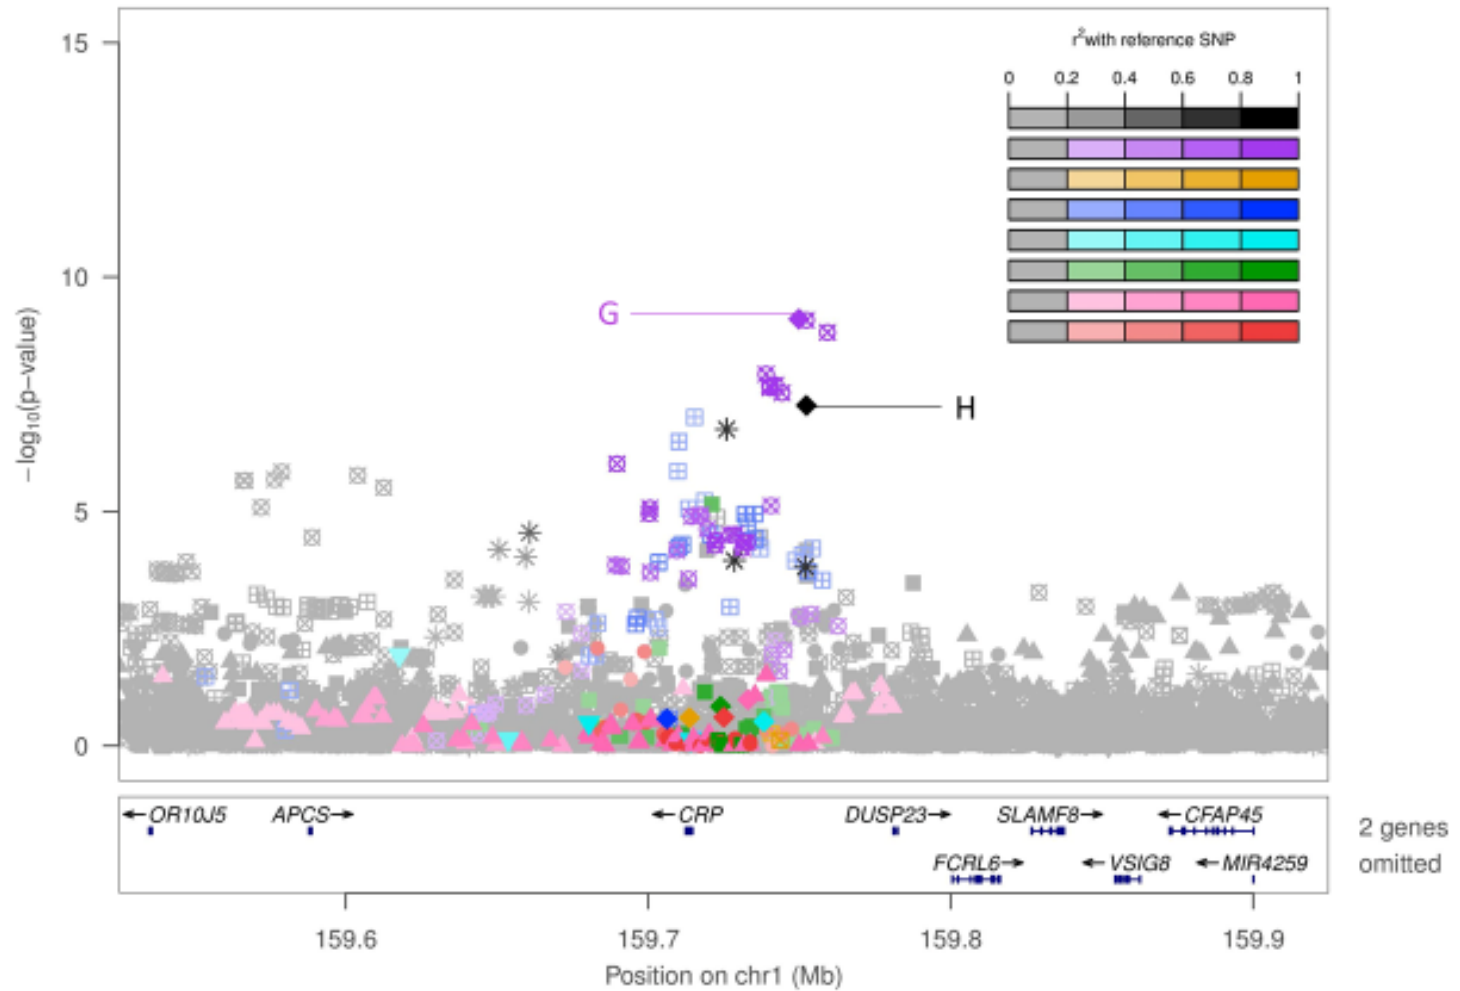

g. In ancestry pooled analysis, LocusZoom plot of association results conditioned on rs7551731, rs73024795, rs2211321, rs553202904, rs11265259, rs1800947, and rs12734907 (lead variant rs181704186).

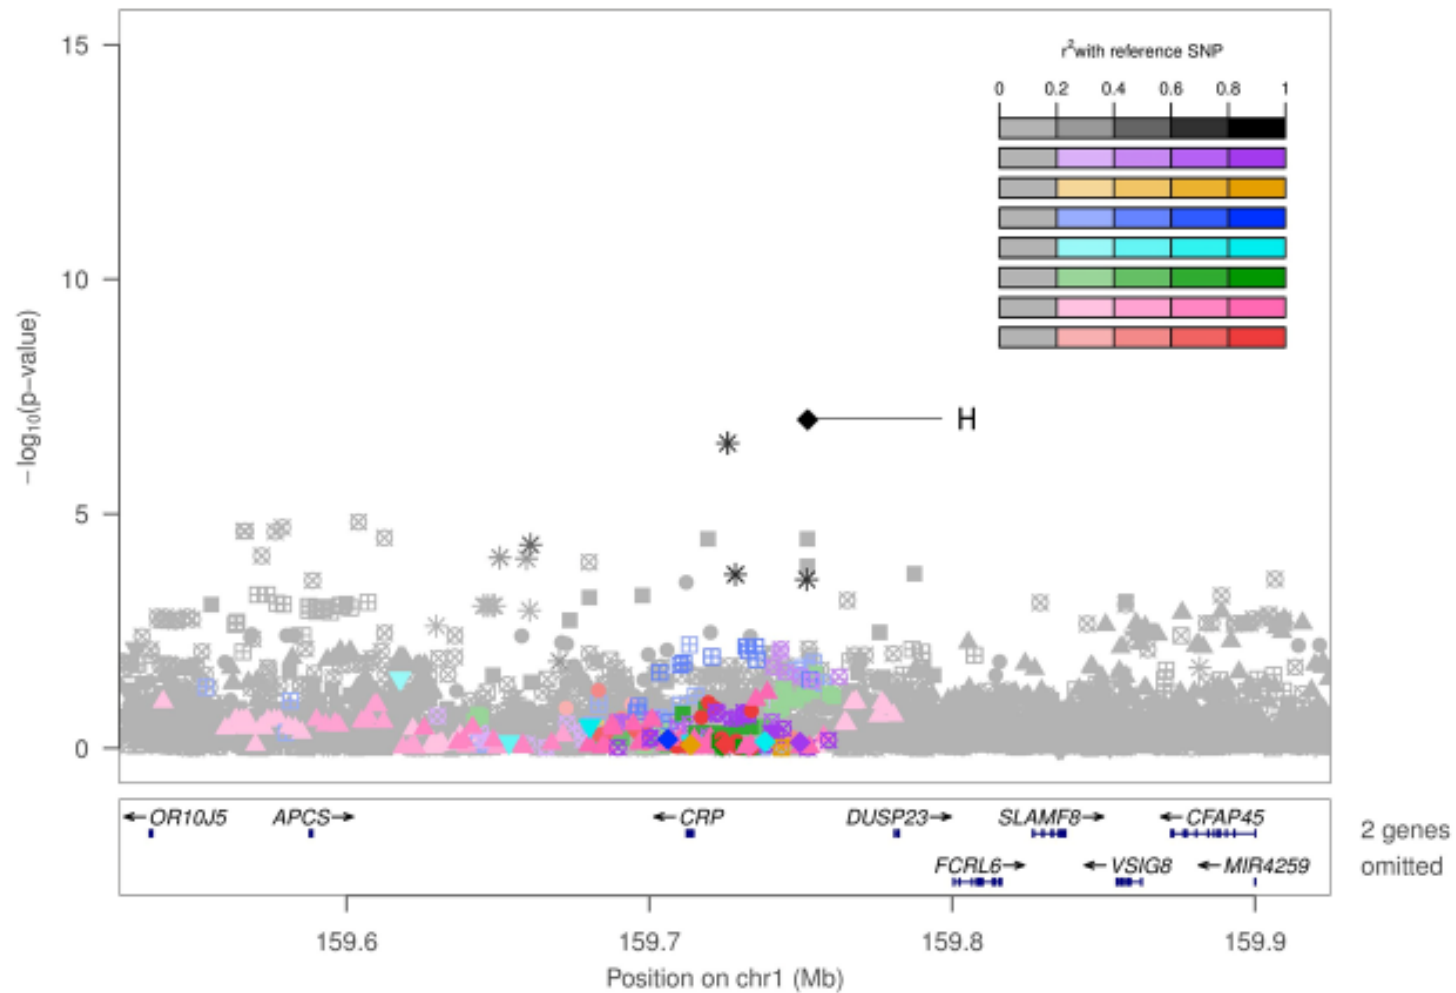

- h. Ancestry pooled analysis conditioned on all previously known variants from GWAS and exome sequencing studies. Only signals E and H are labelled, as these are the only signals still reaching our locus-wide significance threshold (as listed in Table 1).

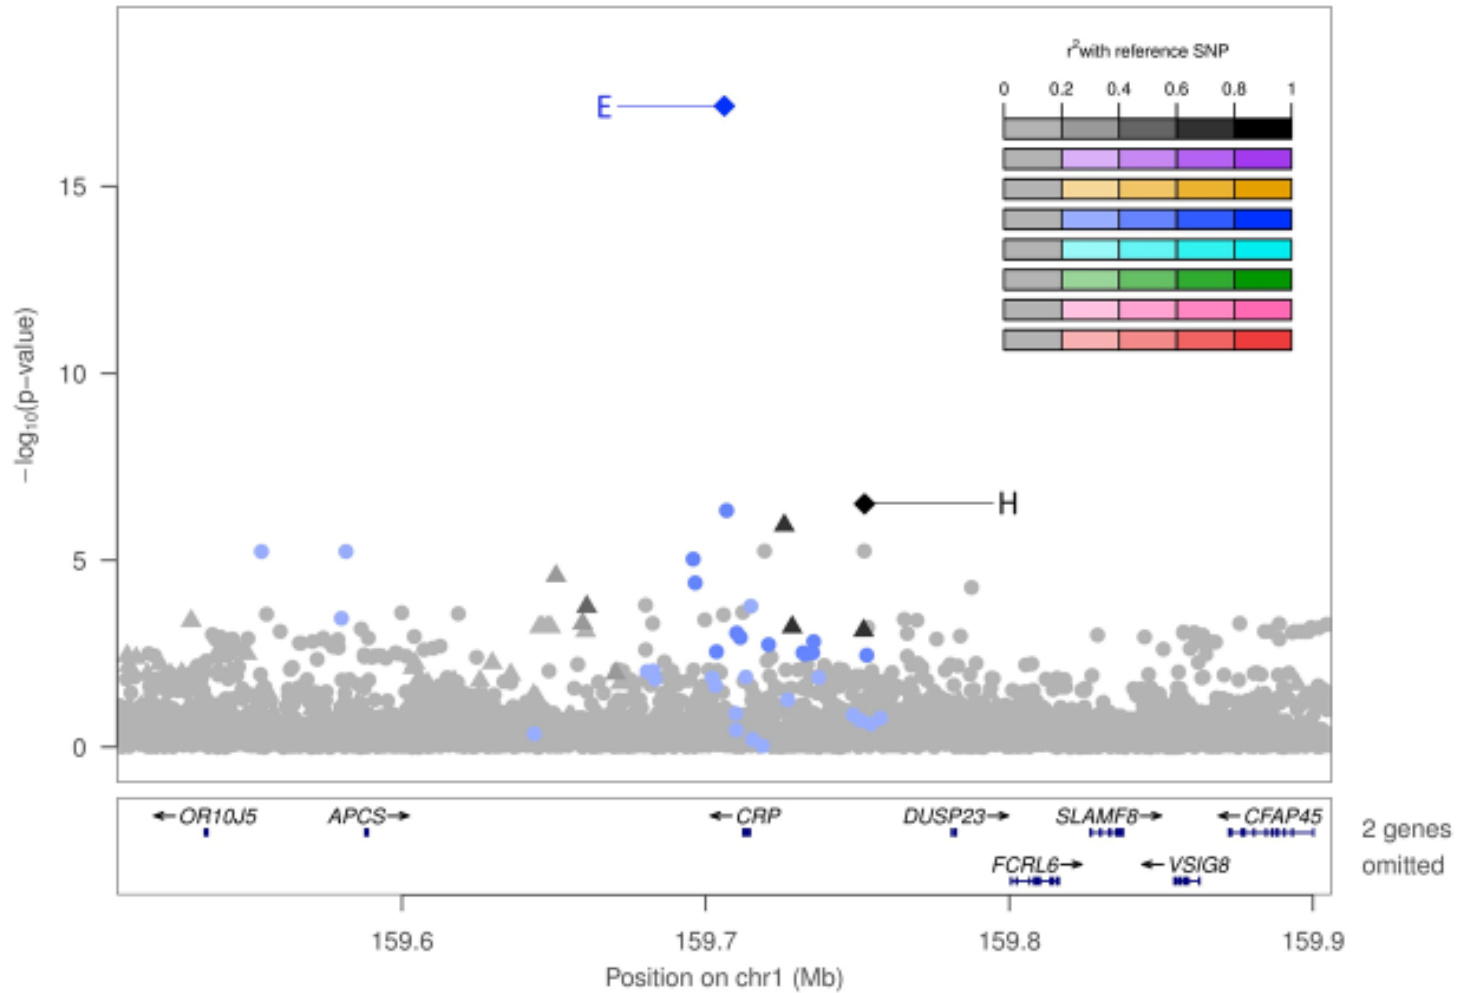

**Figure S3: LocusZoom plots for sequential conditional analysis results at *CRP* locus, as well as plot of *CRP* locus adjusting for all previously identified *CRP* locus variants, with ancestry stratified LD reference panels.**

- a. In ancestry pooled analysis, LocusZoom plot of association results (lead variant rs7551731). Letters in this and subsequent figures correspond to the list of conditionally distinct signals in Table 2. All plots display  $-\log_{10}(p\text{-value})$  versus genomic location for all distinct signals subsequent to ones conditioned on, using order from Table. The lead variant for each conditionally distinct signal is indicated with a diamond, with other variants in linkage disequilibrium  $r^2 > 0.2$  indicated in the colors used for each letter label and displayed on the legend at right, each with a different shape (for example, variants in close linkage disequilibrium with signal B (rs73024795) are displayed as pink triangles). Linkage disequilibrium is calculated based on European American participants in TOPMed *CRP* analysis; association statistics are from pooled analysis.

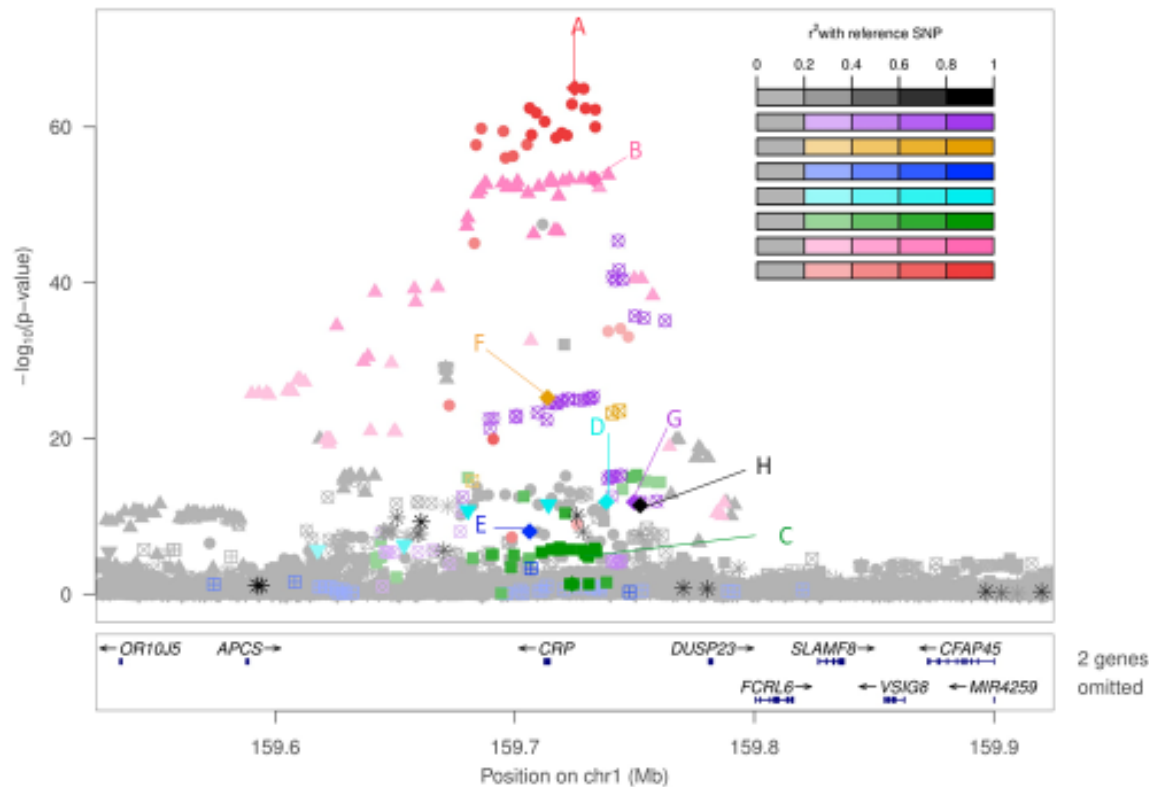

- b. In ancestry pooled analysis, LocusZoom plot of association results conditioned on rs7551731 (lead variant rs73024795). Linkage disequilibrium is calculated based on European American participants in TOPMed CRP analysis; association statistics are from pooled analysis.

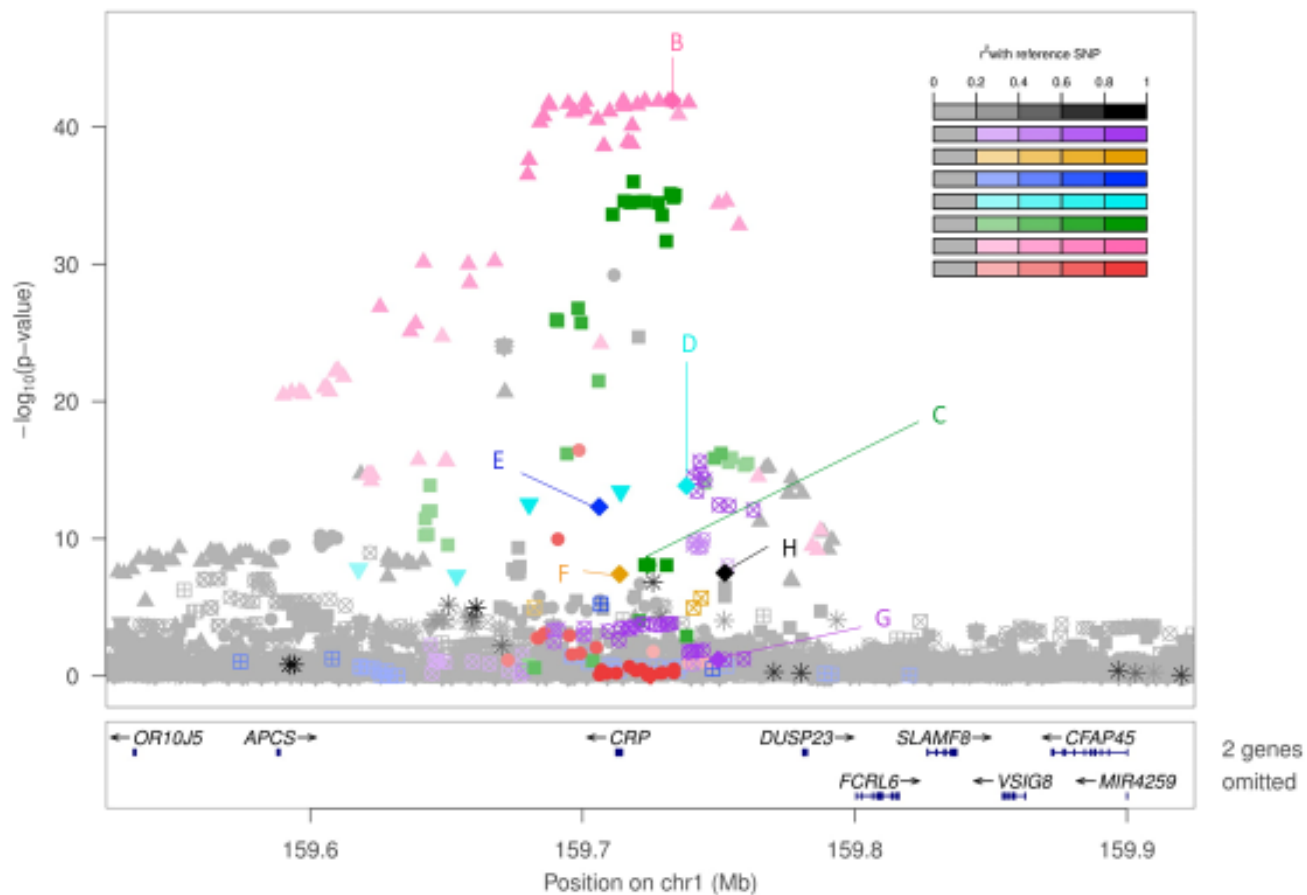

- c. In ancestry pooled analysis, LocusZoom plot of association results conditioned on rs7551731 and rs73024795 (lead variant rs2211321). Linkage disequilibrium is calculated based on European American participants in TOPMed CRP analysis; association statistics are from pooled analysis.

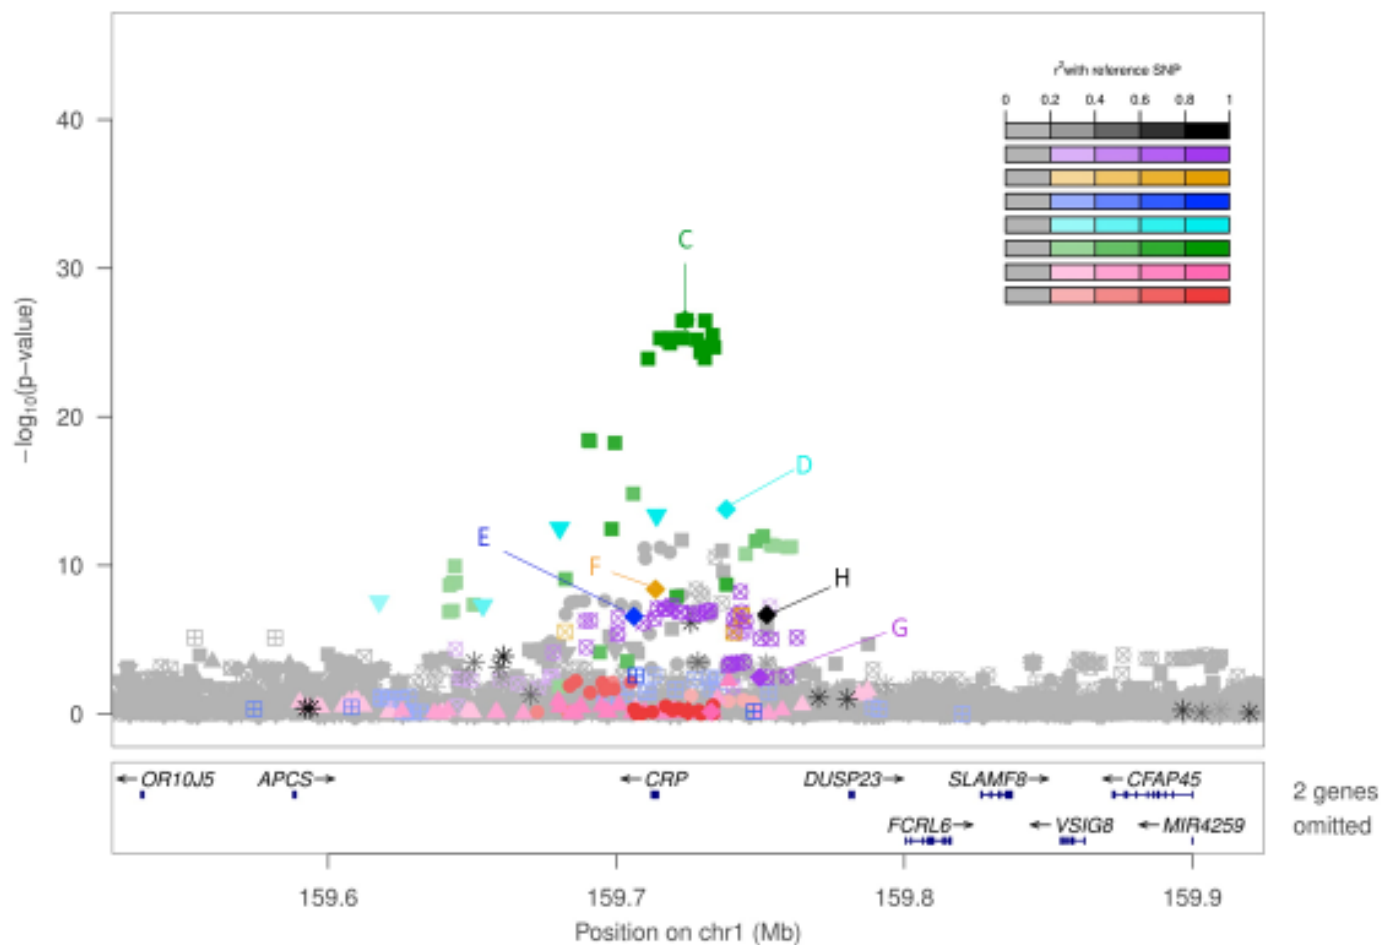

- d. In ancestry pooled analysis, LocusZoom plot of association results conditioned on rs7551731, rs73024795, and rs2211321 (lead variant rs553202904). Linkage disequilibrium is calculated based on European American participants in TOPMed CRP analysis; association statistics are from pooled analysis.

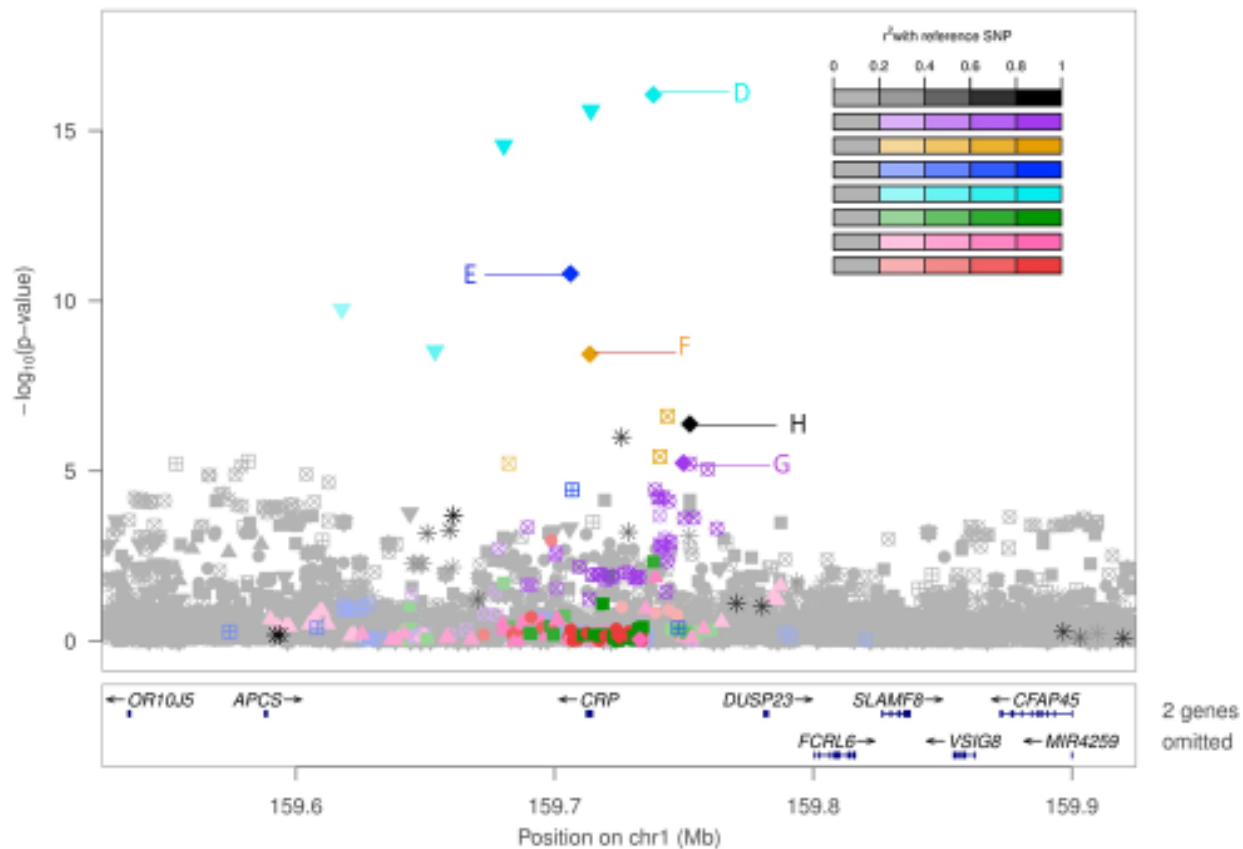

e. In ancestry pooled analysis, LocusZoom plot of association results conditioned on rs7551731, rs73024795, rs2211321, and rs553202904 (lead variant rs11265259). Linkage disequilibrium is calculated based on European American participants in TOPMed CRP analysis; association statistics are from pooled analysis.

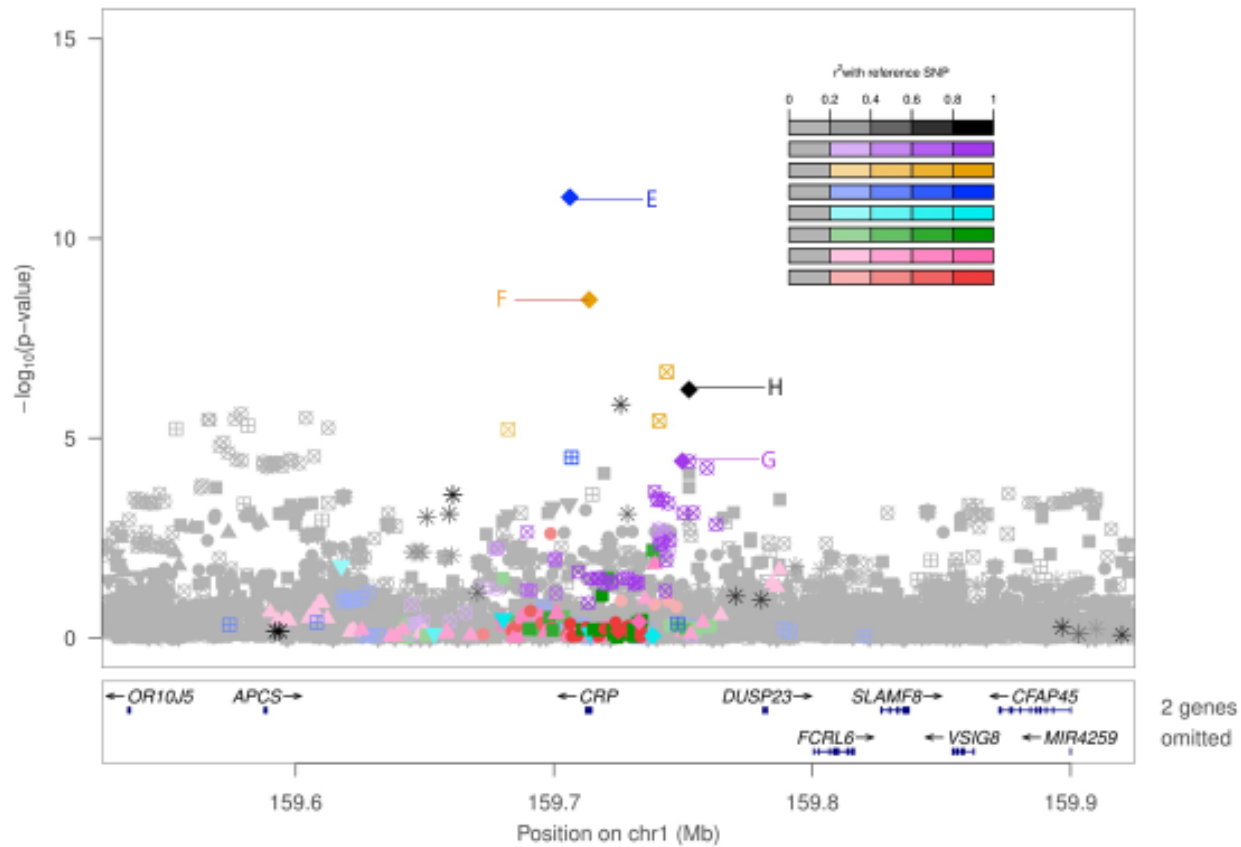



- f. In ancestry pooled analysis, LocusZoom plot of association results conditioned on rs7551731, rs73024795, rs2211321, rs553202904, and rs11265259 (lead variant rs1800947). Linkage disequilibrium is calculated based on European American participants in TOPMed CRP analysis; association statistics are from pooled analysis.

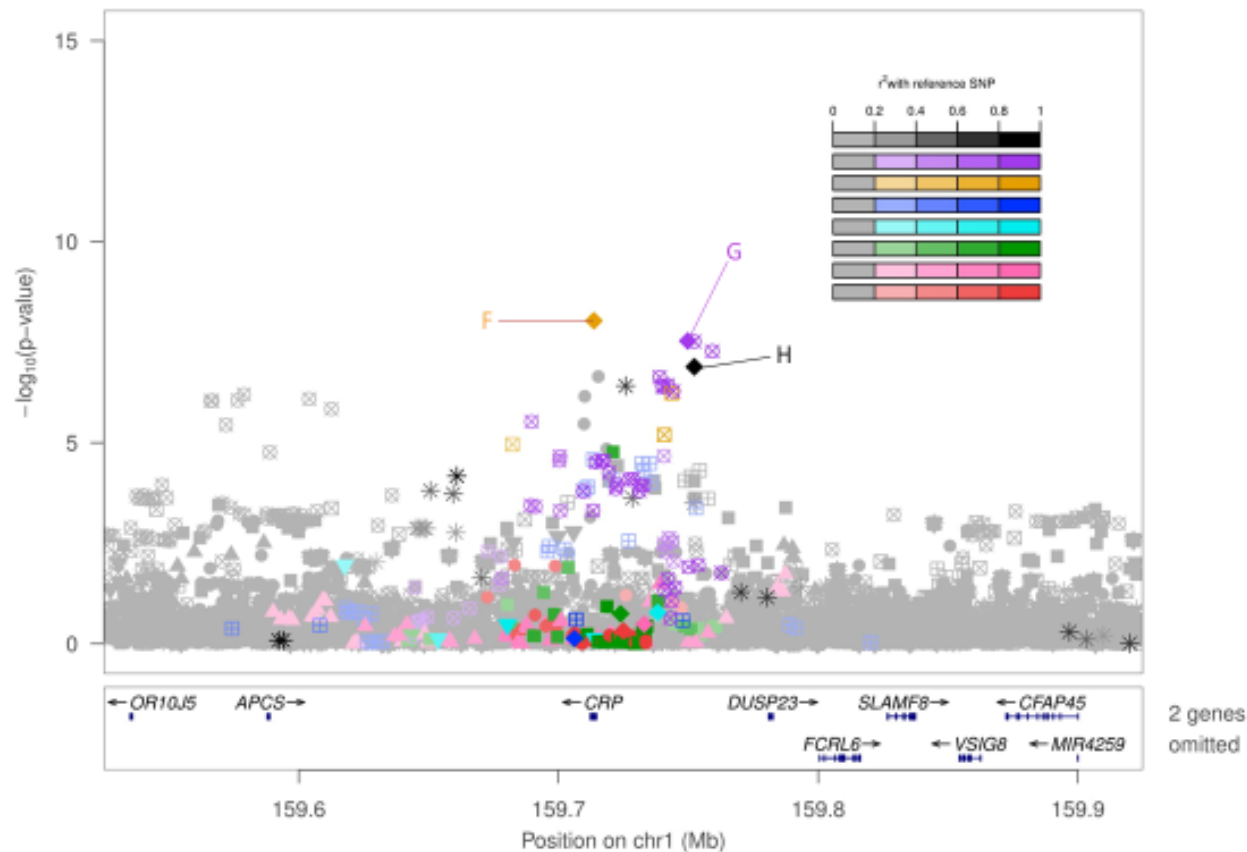

g. In ancestry pooled analysis, LocusZoom plot of association results conditioned on rs7551731, rs73024795, rs2211321, rs553202904, rs11265259, and rs1800947 (lead variant rs12734907). Linkage disequilibrium is calculated based on European American participants in TOPMed CRP analysis.

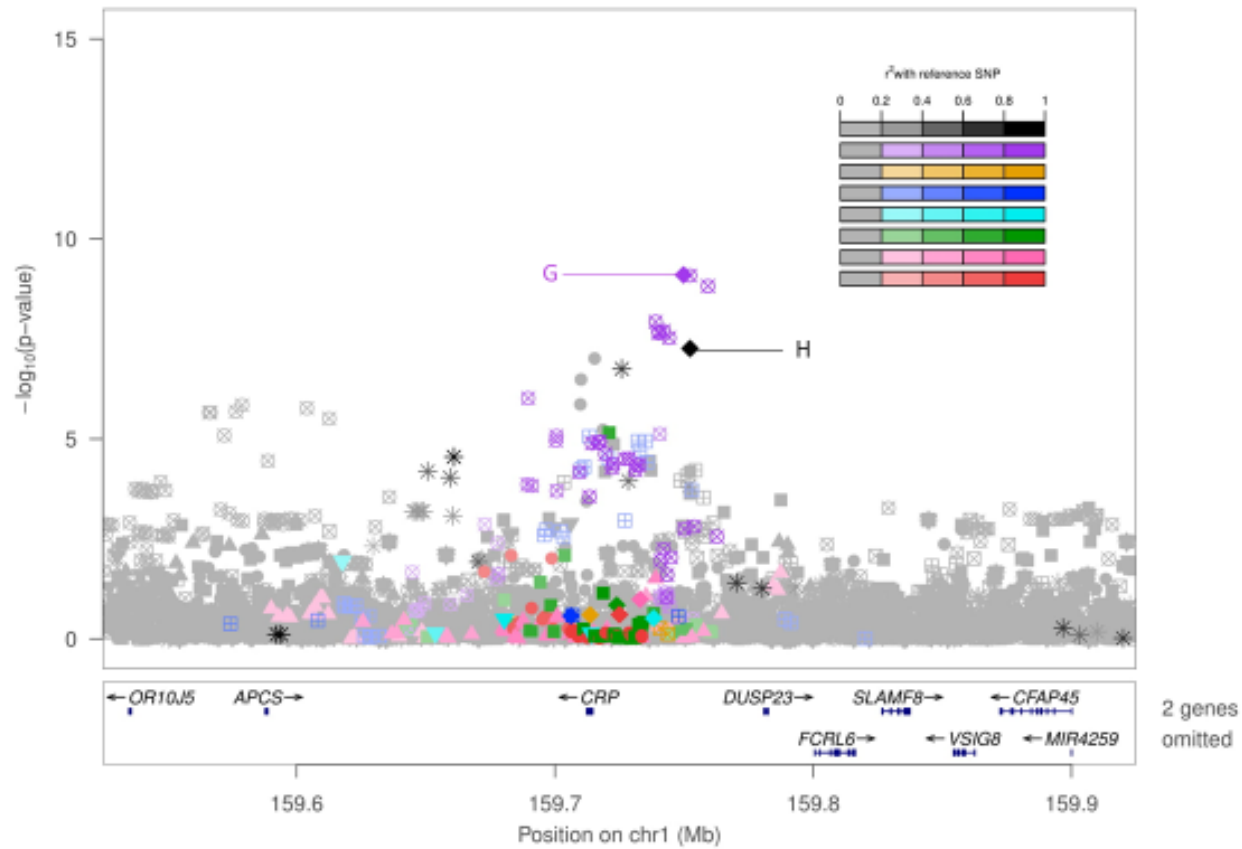

h. In ancestry pooled analysis, LocusZoom plot of association results conditioned on rs7551731, rs73024795, rs2211321, rs553202904, rs11265259, rs1800947, and rs12734907 (lead variant rs181704186). Linkage disequilibrium is calculated based on European American participants in TOPMed CRP analysis; association statistics are from pooled analysis.

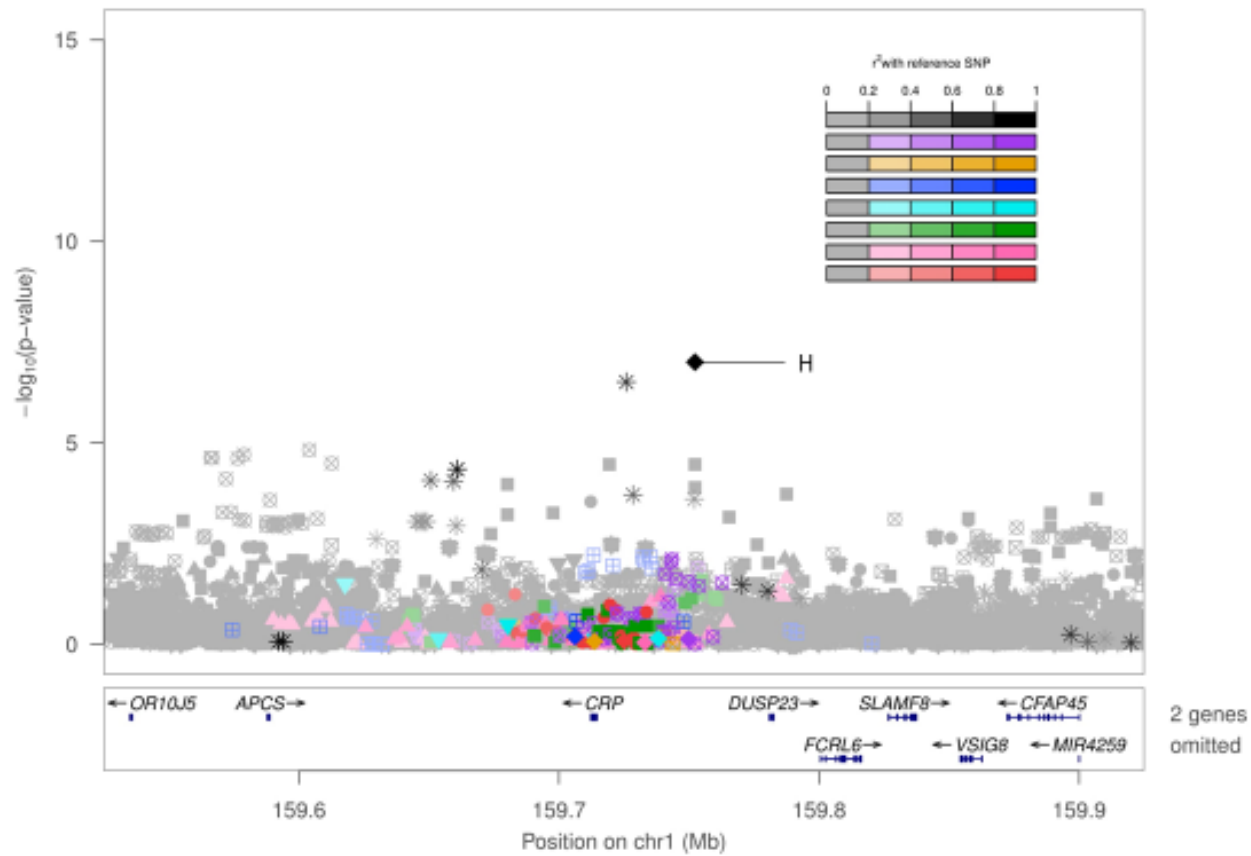

- i. Ancestry pooled analysis conditioned on all previously known variants from GWAS and exome sequencing studies. Only signals E and H are labelled, as these are the only signals still reaching our locus-wide significance threshold (as listed in Table 1). Linkage disequilibrium is calculated based on European American participants in TOPMed CRP analysis; association statistics are from pooled analysis.

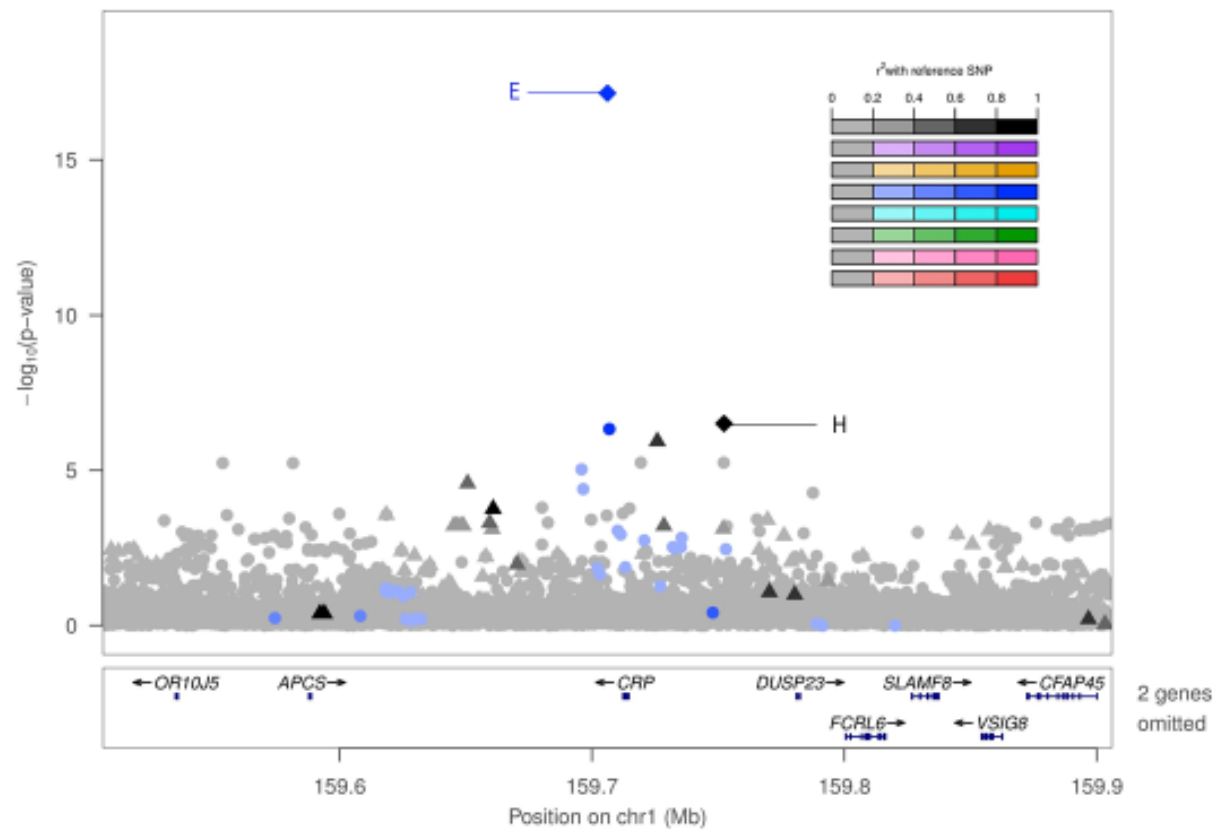

- j. In ancestry pooled analysis, LocusZoom plot of association results (lead variant rs7551731). Linkage disequilibrium is calculated based on African American participants in TOPMed CRP analysis; association statistics are from pooled analysis.

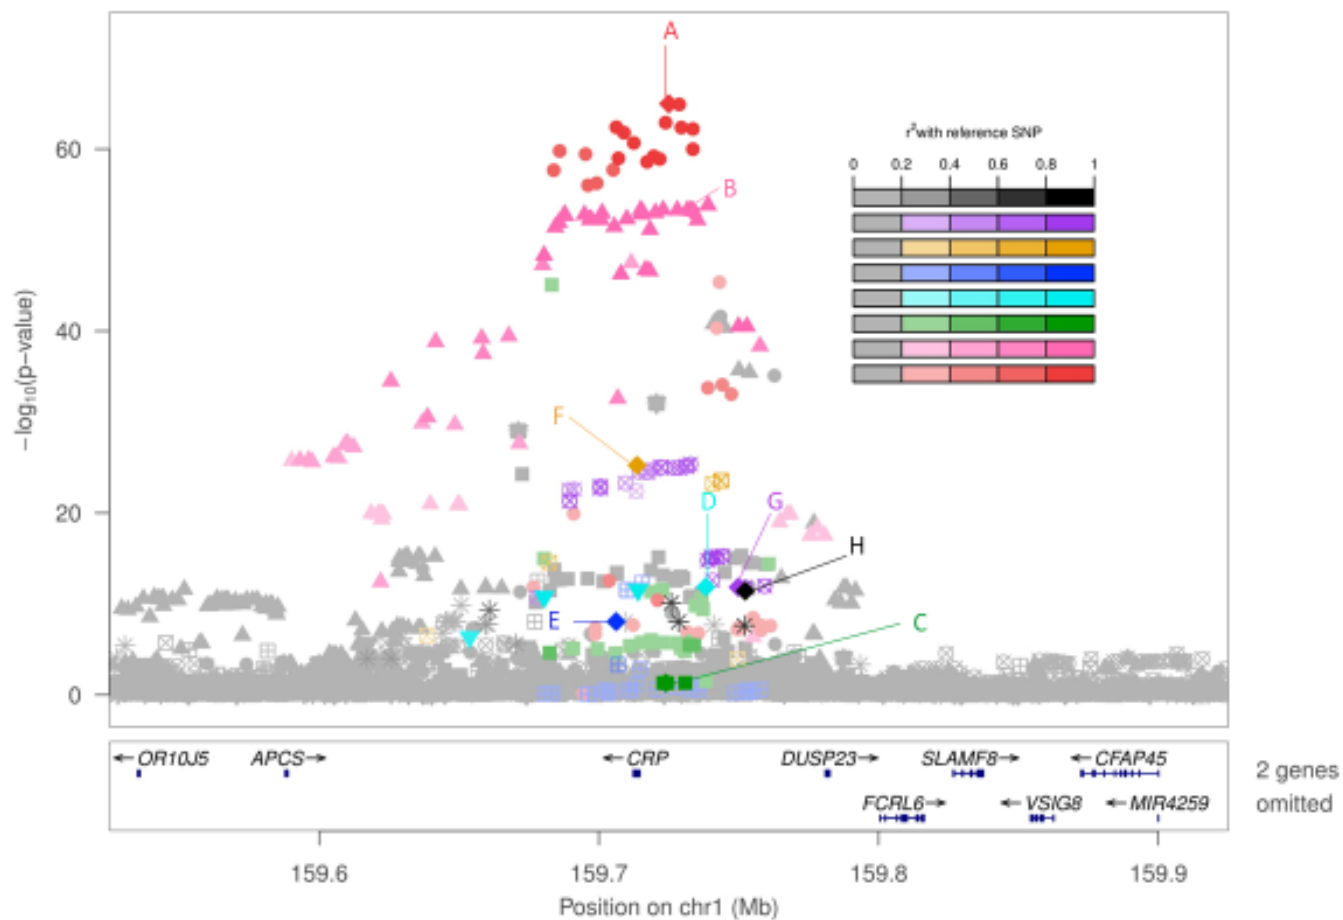

- k. In ancestry pooled analysis, LocusZoom plot of association results conditioned on rs7551731 (lead variant rs73024795). Linkage disequilibrium is calculated based on African American participants in TOPMed CRP analysis; association statistics are from pooled analysis.

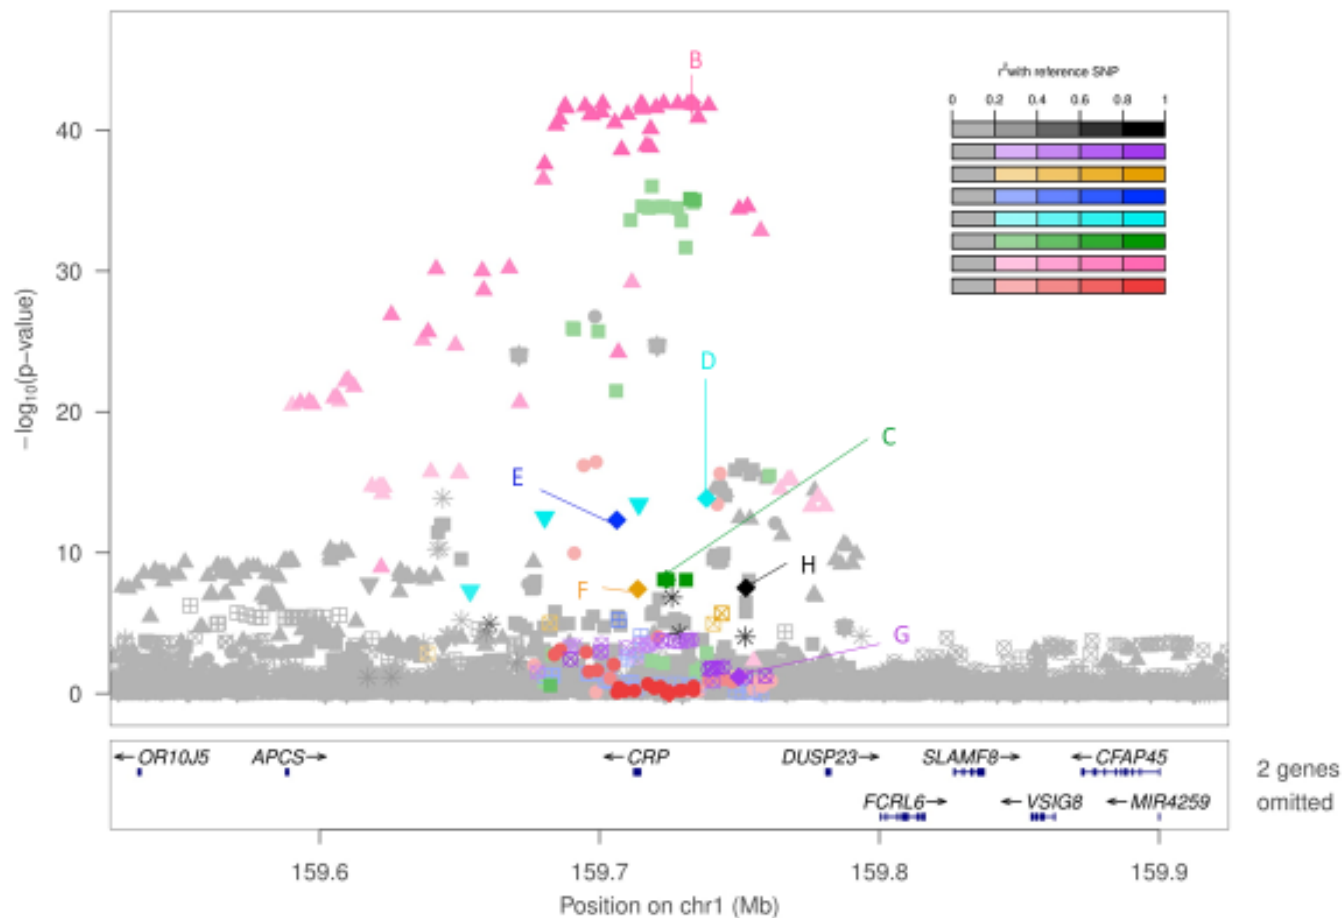

- I. In ancestry pooled analysis, LocusZoom plot of association results conditioned on rs7551731 and rs73024795 (lead variant rs2211321). Linkage disequilibrium is calculated based on African American participants in TOPMed CRP analysis; association statistics are from pooled analysis.

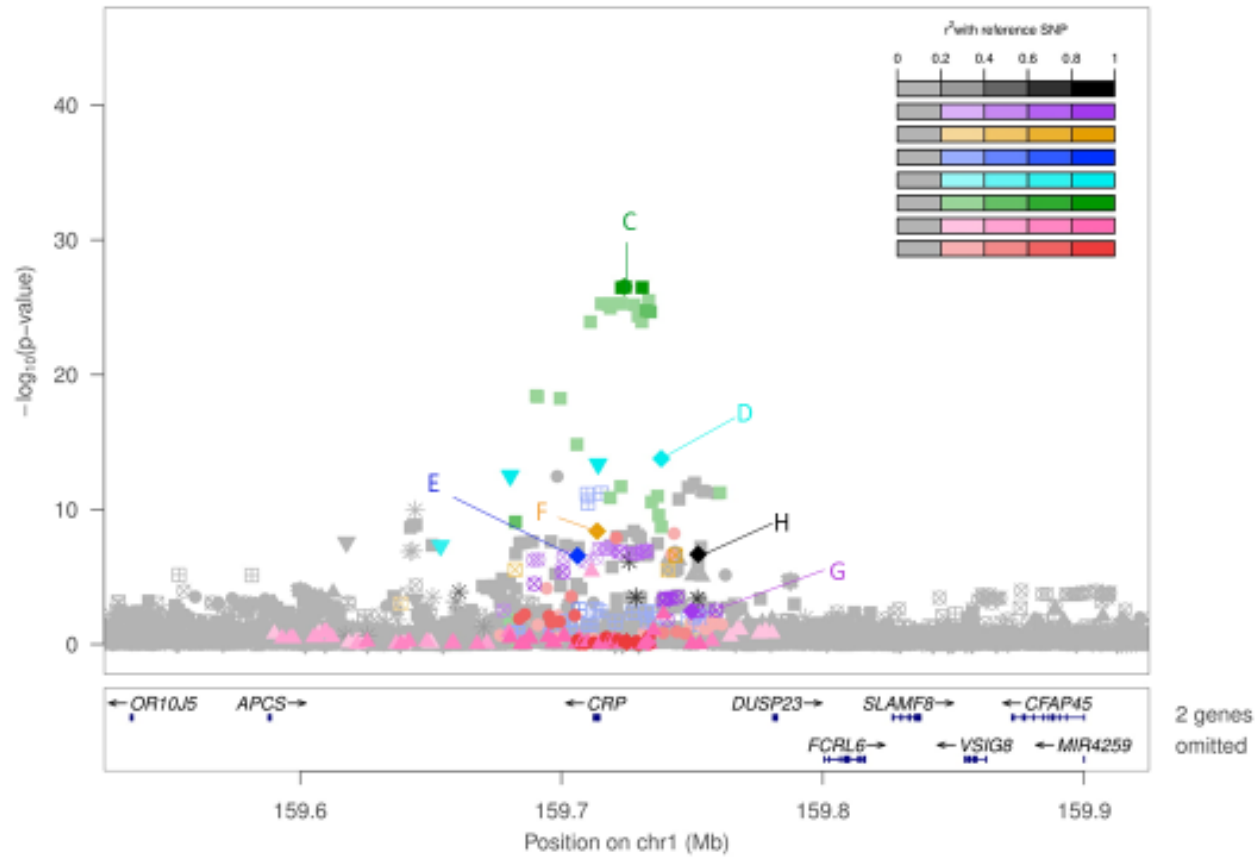

m. In ancestry pooled analysis, LocusZoom plot of association results conditioned on rs7551731, rs73024795, and rs2211321 (lead variant rs553202904). Linkage disequilibrium is calculated based on African American participants in TOPMed CRP analysis; association statistics are from pooled analysis.

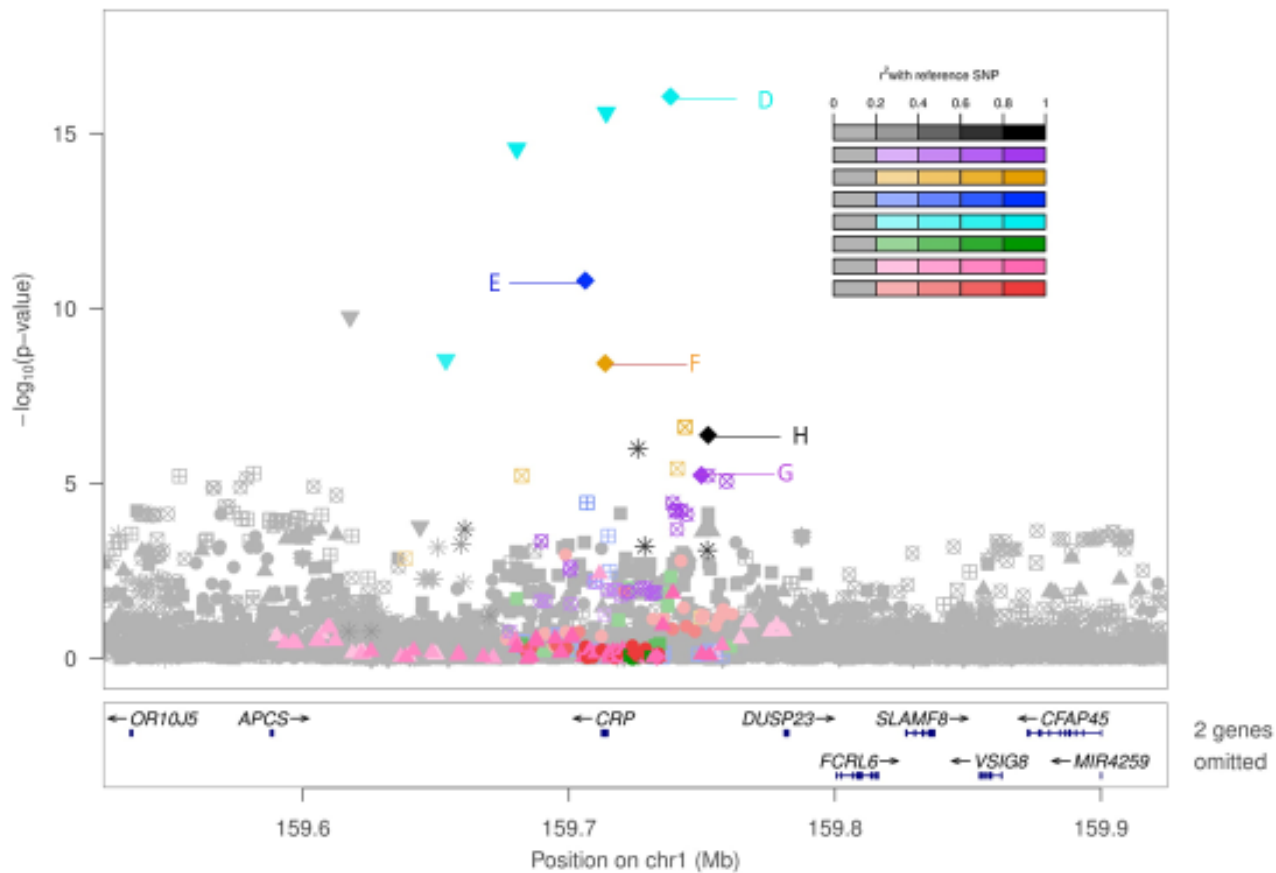



- n. In ancestry pooled analysis, LocusZoom plot of association results conditioned on rs7551731, rs73024795, rs2211321, and rs553202904 (lead variant rs11265259). Linkage disequilibrium is calculated based on African American participants in TOPMed CRP analysis; association statistics are from pooled analysis.

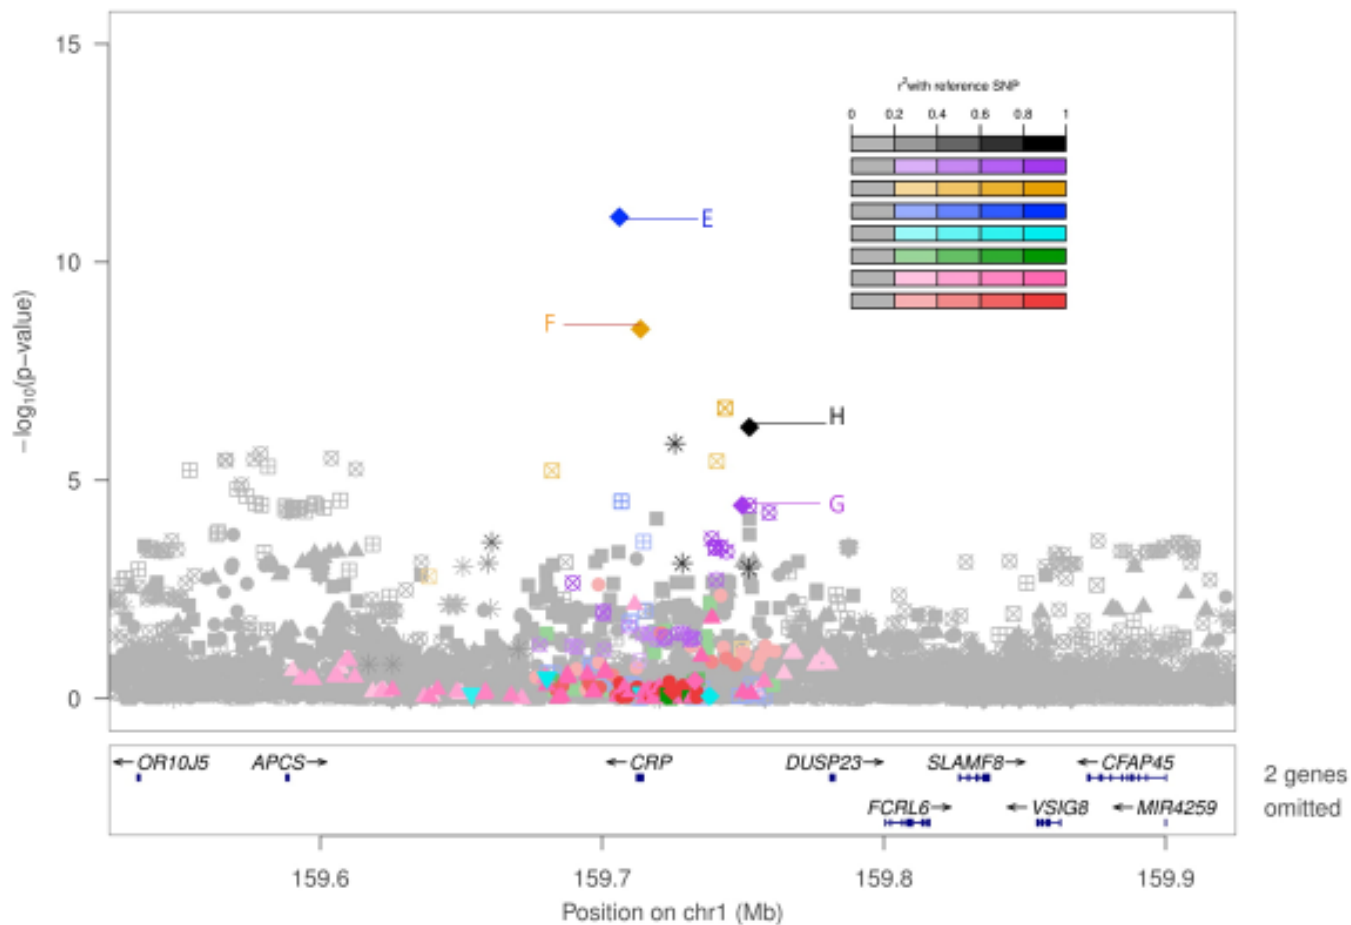

- o. In ancestry pooled analysis, LocusZoom plot of association results conditioned on rs7551731, rs73024795, rs2211321, rs553202904, and rs11265259 (lead variant rs1800947). Linkage disequilibrium is calculated based on African American participants in TOPMed CRP analysis; association statistics are from pooled analysis.

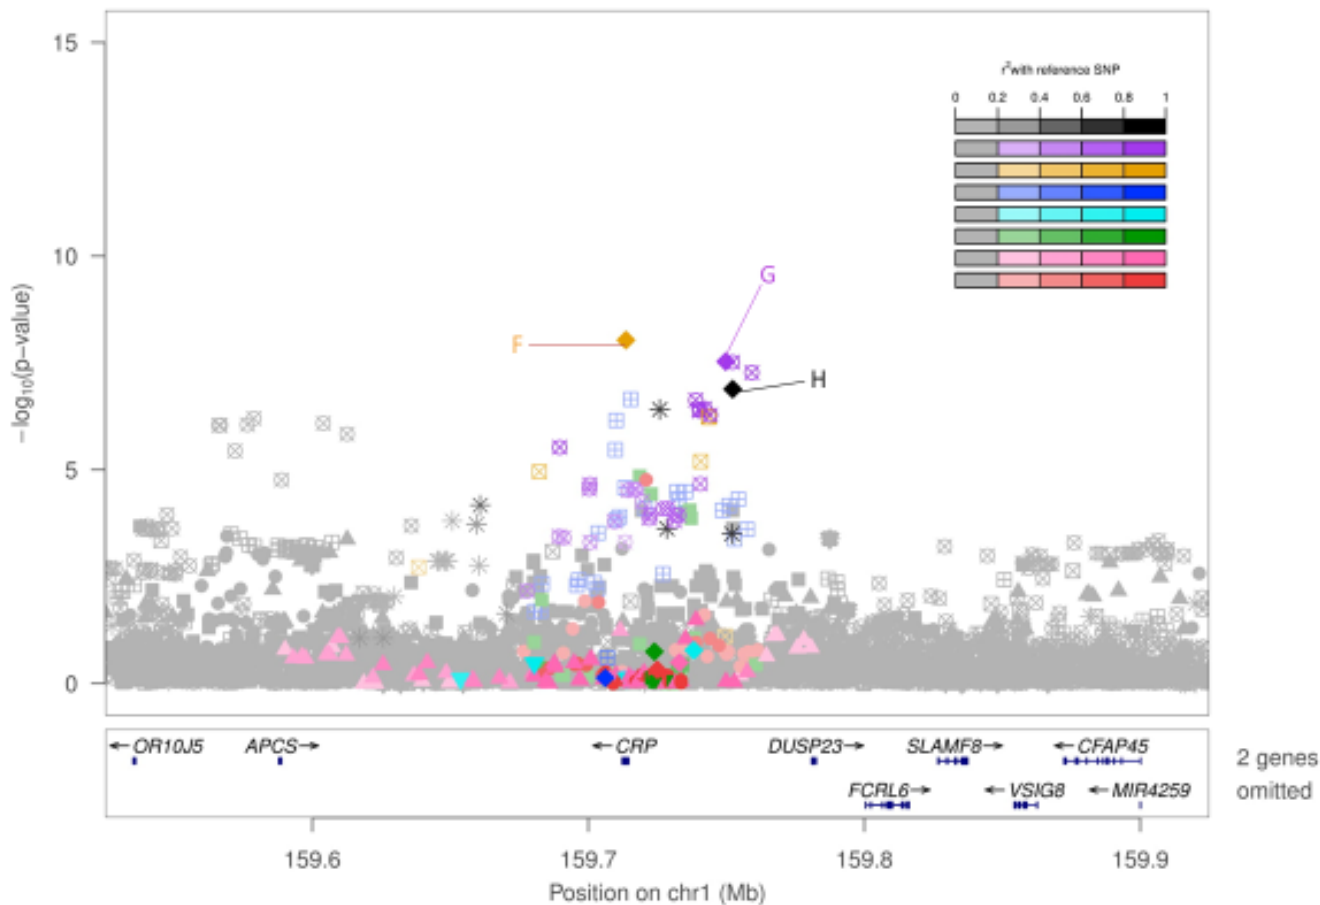

p. In ancestry pooled analysis, LocusZoom plot of association results conditioned on rs7551731, rs73024795, rs2211321, rs553202904, rs11265259, and rs1800947 (lead variant rs12734907). Linkage disequilibrium is calculated based on African American participants in TOPMed CRP analysis.

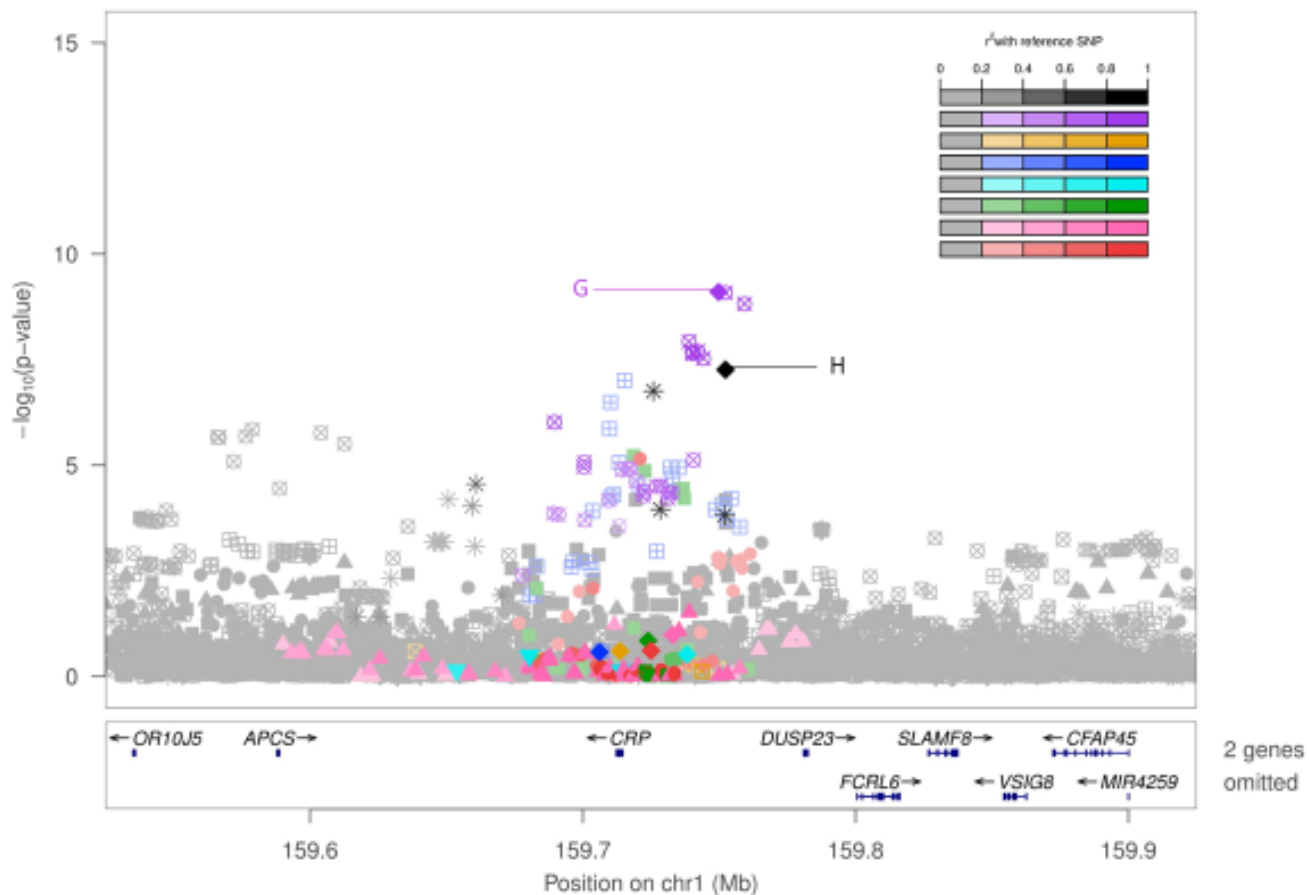

q. In ancestry pooled analysis, LocusZoom plot of association results conditioned on rs7551731, rs73024795, rs2211321, rs553202904, rs11265259, rs1800947, and rs12734907 (lead variant rs181704186). Linkage disequilibrium is calculated based on African American participants in TOPMed CRP analysis; association statistics are from pooled analysis.

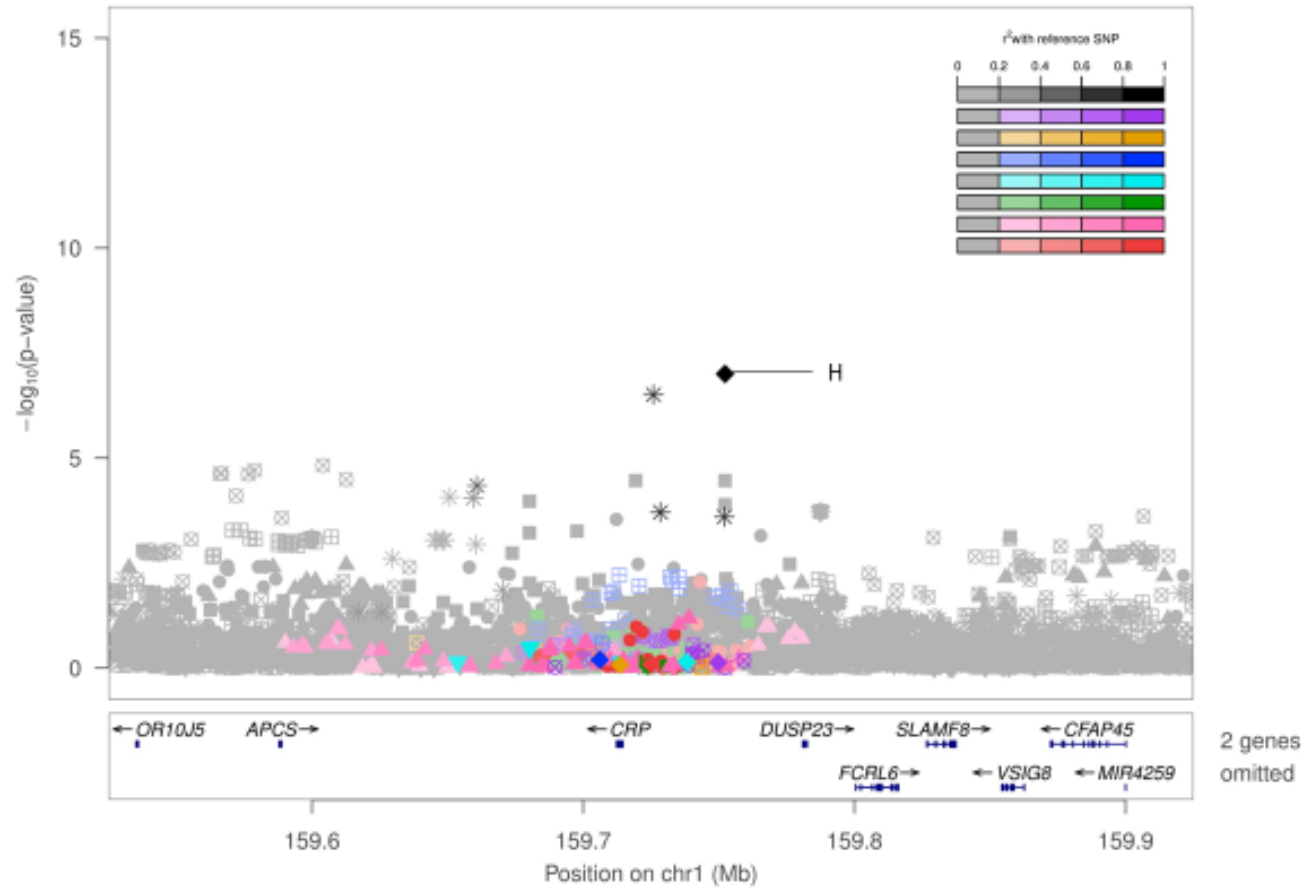

- r. Ancestry pooled analysis conditioned on all previously known variants from GWAS and exome sequencing studies. Only signals E and H are labelled, as these are the only signals still reaching our locus-wide significance threshold (as listed in Table 1). Linkage disequilibrium is calculated based on African American participants in TOPMed CRP analysis; association statistics are from pooled analysis.

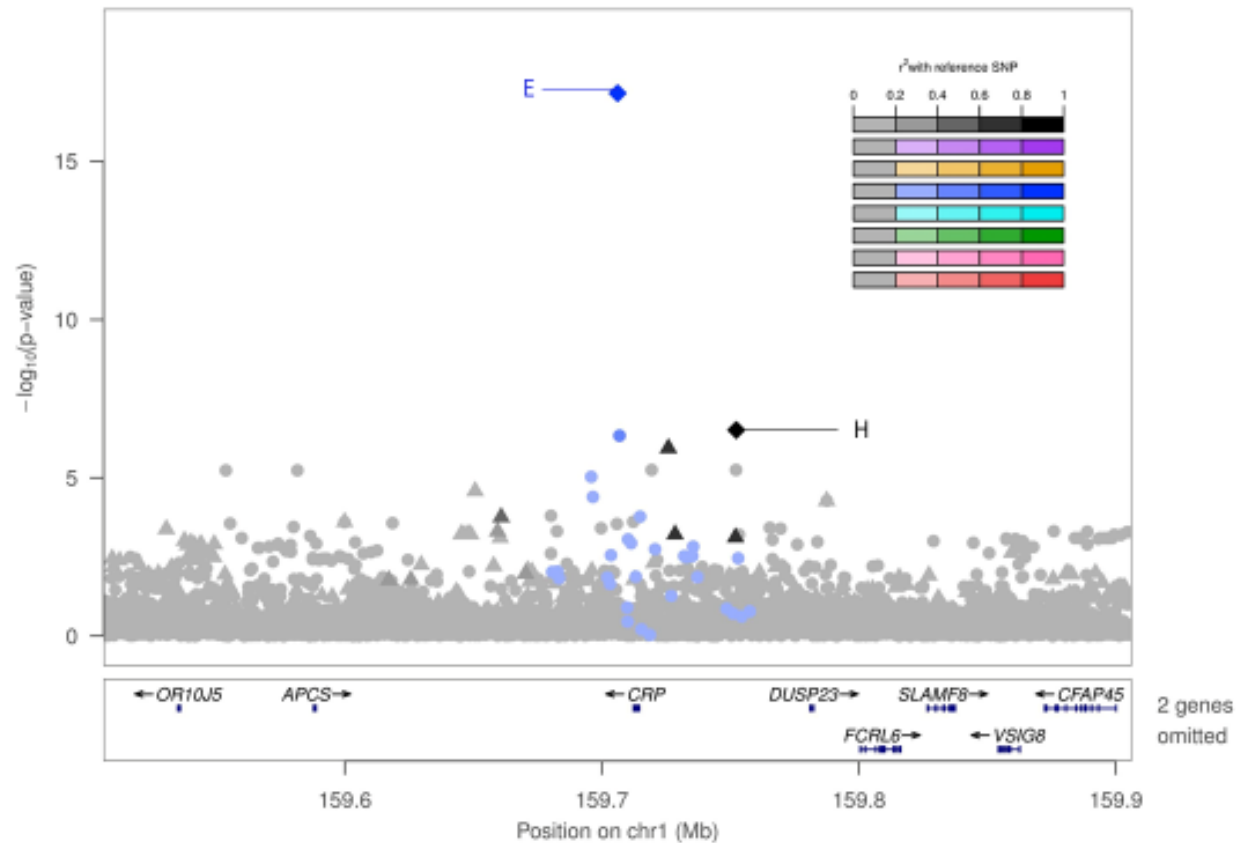

**Figure S4: Functional annotation information for rs11265259.** Genome browser plot for rs11265259, displaying UCSC genes, chromHMM annotation in adult liver (yellow=enhancer, green=weak transcription, red=transcription start site) from RoadMap Epigenomics, H3K4me1 signal from adult liver, 100 vertebrates basewise conservation by PhyloP, and transcription factor ChIP-seq clusters from ENCODE (161 factor version, motifs highlighted in green, proportion cell types detected/ total number of cell types assayed displayed). Unlike in the plot for rs181704186, we did not display GeneHancer due to lack of any relevant signals. No other variants have linkage disequilibrium  $r^2 \geq 0.8$  with lead variant rs11265259.

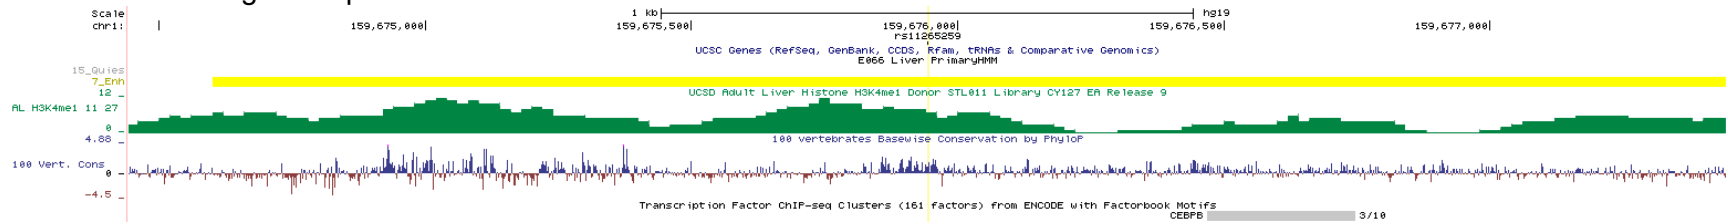

**Figure S5: Additional Information for Functional Assays.**

a. Additional luciferase assay for rs181704186. Blue lines indicate the groups compared for each listed p-value.

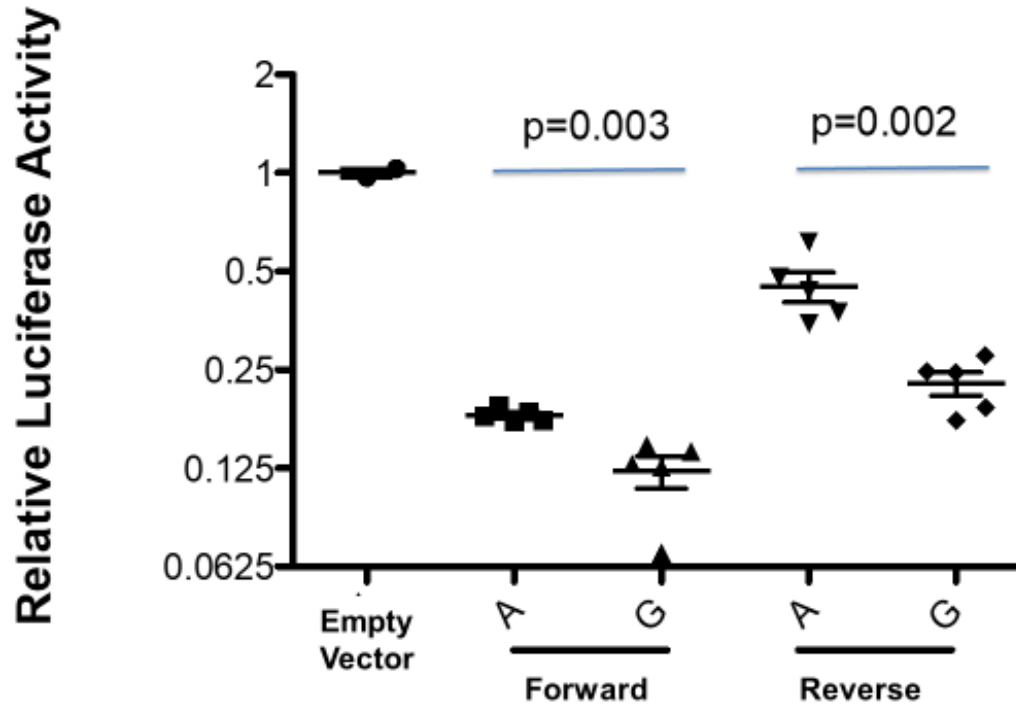

b. Full EMSA from main text Figure 2. NE, nuclear extract.

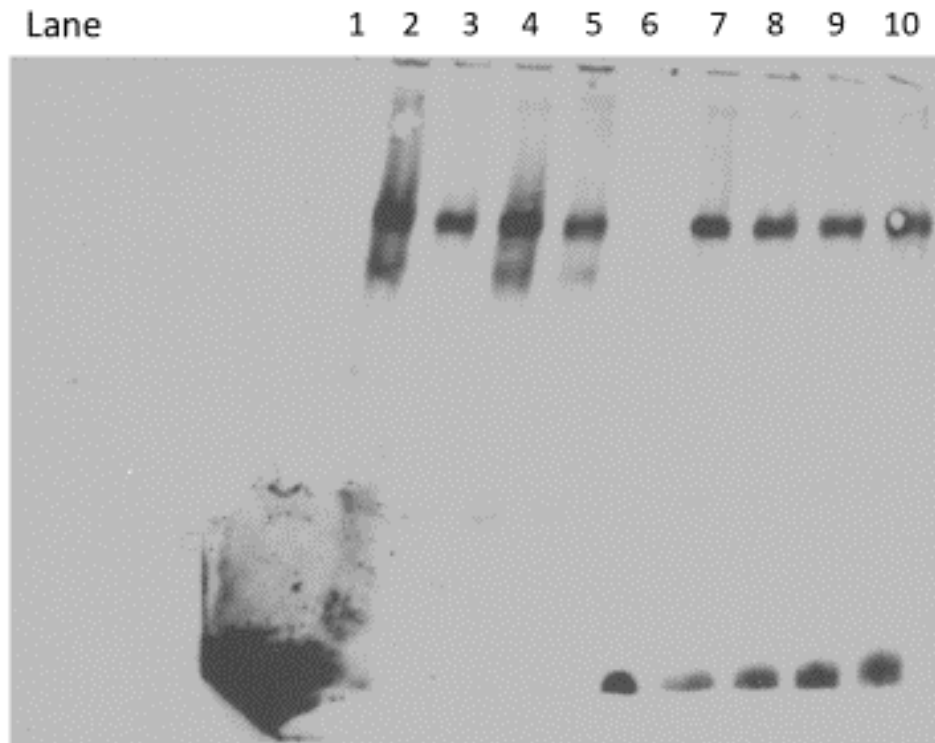

| Lane                        | 1 | 2 | 3 | 4 | 5 | 6 | 7 | 8 | 9 | 10 |
|-----------------------------|---|---|---|---|---|---|---|---|---|----|
| Labeled probe               | A | A | A | A | A | G | G | G | G | G  |
| HepG2 NE                    | - | + | + | + | + | - | + | + | + | +  |
| Unlabeled competition (40x) | - | - | A | G | - | - | - | A | G | -  |
| CEBPB antibody              | - | - | - | - | + | - | - | - | - | +  |



c. Additional replicate of EMSA for rs181704186. EMSA with biotin-labeled probes containing the A or G allele of rs181704186 shows an allele-specific band (arrow; lane 2 versus 6) that is competed away by 40-fold excess of unlabeled probe containing the A allele (lane 3), but unaffected by a 40-fold excess of probe containing the G allele (lane 4). NE, nuclear extract.

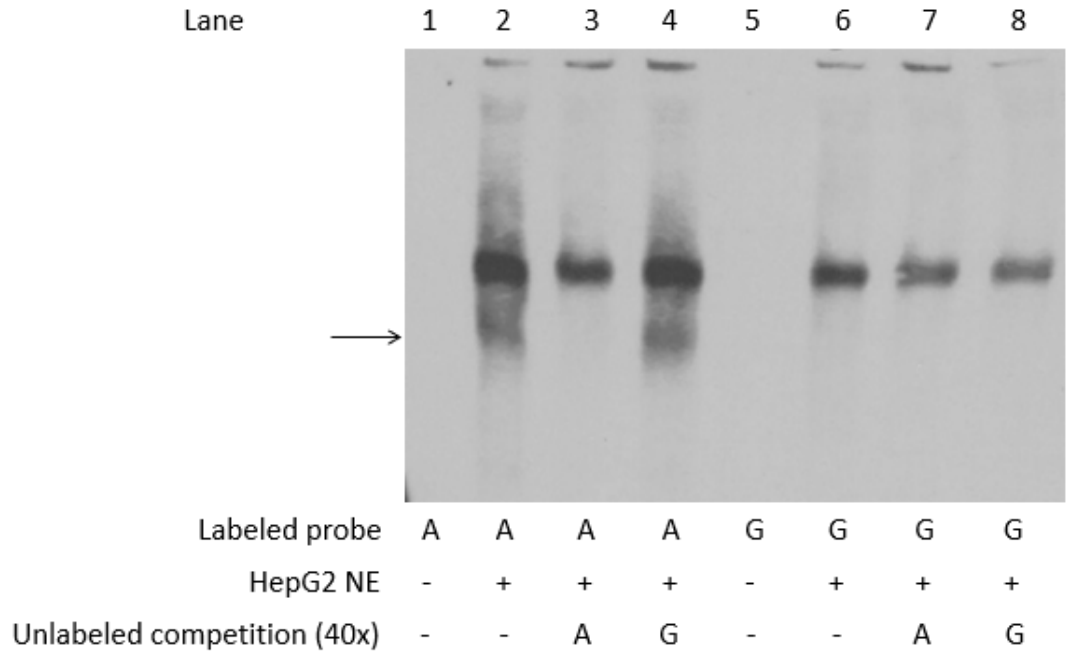

d. Full EMSA from Figure S4c.

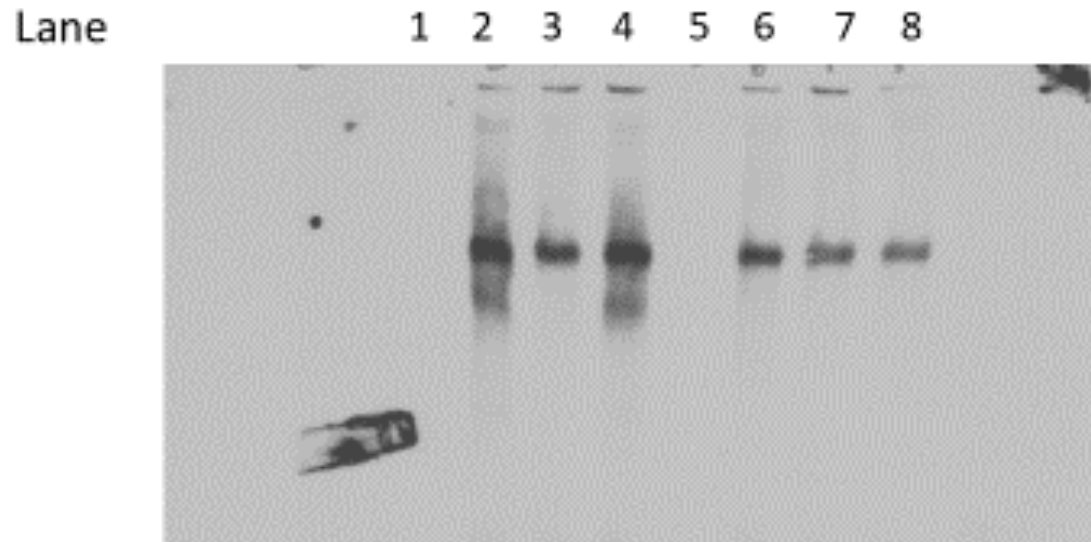

|                             |   |   |   |   |   |   |   |   |
|-----------------------------|---|---|---|---|---|---|---|---|
| Labeled probe               | A | A | A | A | G | G | G | G |
| HepG2 NE                    | - | + | + | + | - | + | + | + |
| Unlabeled competition (40x) | - | - | A | G | - | - | A | G |

**Table S1: Cohort demographic characteristics and C-reactive protein assays.**

| Study                                                        | N     | Mean (SD) Age | % female | Mean (SD) C-reactive Protein | Self-Reported Ancestry                 | Case/control status (if used for sample selection)    | Assay                                                                                                                                                        |
|--------------------------------------------------------------|-------|---------------|----------|------------------------------|----------------------------------------|-------------------------------------------------------|--------------------------------------------------------------------------------------------------------------------------------------------------------------|
| Atherosclerosis Risk in Communities (ARIC)                   | 2,433 | 63.7 (5.6)    | 51.1%    | 4.3 (6.2)                    | 95.9% EA, 4.1% AA                      | Case 5.5% (VTE or atrial fibrillation), control 94.5% | BNII analyzer (Siemens Healthcare Diagnostics, Deerfield, Illinois) <sup>1</sup>                                                                             |
| Cleveland Family Study (CFS)                                 | 570   | 42.3 (18.7)   | 56.0%    | 4.4 (6.1)                    | 42.1% EA, 54.9% AA, 3.0% Multiple      | NA                                                    | Dade Behring BNII nephelometer                                                                                                                               |
| Framingham Heart Study (FHS)                                 | 3,151 | 53.0 (14.3)   | 53.5%    | 3.5 (5.1)                    | EA                                     | NA                                                    | Dade Behring BN 100 High Sensitivity CRP Agent, Dade Behring CardioPhase hsCRP, Roche cobas c501 CRP High Sensitivity Assay                                  |
| Genetic Epidemiology of COPD (COPDGene)                      | 504   | 63.6 (8.7)    | 51.0%    | 4.8 (5.8)                    | EA                                     | NA                                                    | Myriad RBM custom multiplex <sup>2</sup>                                                                                                                     |
| Genetic Studies of Atherosclerosis Risk (GeneSTAR)           | 1,525 | 43.0 (11.9)   | 60.3%    | 2.9 (3.1)                    | 55.6% EA, 44.4% AA                     | NA                                                    | Dako and E80C                                                                                                                                                |
| Jackson Heart Study (JHS)                                    | 3,035 | 55.5 (12.8)   | 61.9%    | 5.0 (7.3)                    | AA                                     | NA                                                    | Immunoturbidimetric CRP-Latex assay (Kamiya Biomedical Company, Seattle, WA) using a Hitachi 911 analyzer (Roche Diagnostics, Indianapolis, IN) <sup>3</sup> |
| Multi-Ethnic Study of Atherosclerosis (MESA) and MESA Family | 4,289 | 61.1 (9.8)    | 51.5%    | 3.5 (4.9)                    | 38.7% EA, 27.2% AA, 21.5% HL, 12.6% AS | NA                                                    | BNII nephelometer (Dade-Behring) <sup>4</sup>                                                                                                                |

| Old Order Amish                 | 988   | 49.4 (16.1) | 50.1%  | 2.0 (3.4) | EA                                                            | NA                                         | Nephelometry                                                                                                                                                                                                                         |
|---------------------------------|-------|-------------|--------|-----------|---------------------------------------------------------------|--------------------------------------------|--------------------------------------------------------------------------------------------------------------------------------------------------------------------------------------------------------------------------------------|
| Women's Health Initiative (WHI) | 6,784 | 67.2 (6.7)  | 100.0% | 4.9 (6.3) | 18.5% AA, 78.7% EA, 3.9% HL, 0.7% AS<br>0.7 AI/AN, 0.2% Other | Case 47.1% (stroke and VTE), control 52.9% | Multiple assays, including BNII Nephelometer, DiaSorin, hs-immunotechnique - Behring analyzer (Denka Seiken; Niigata, Japan), Immulite Analyzer, a Roche Modular P Chemistry analyzer, SPQ High Sensitivity Reagent Hitachi Analyzer |

Note that some individuals identify both as of African American or European American ancestry and as Hispanic/Latino.  
Abbreviations: EA, European American; AA, African American; HL, Hispanic/Latino; AS, East Asian; AI/AN American Indians/Alaska Natives; VTE, venous thromboembolism; SD, standard deviation; NA, not applicable

**Table S2a: Lead variants and number of distinct signals in European American specific association analysis**

| <b>Locus</b>  | <b>Lead Variant</b> | <b>Annotation</b>                            | <b>P-value</b> | <b>Beta</b> | <b>Effect Allele Frequency</b> | <b>Effect Allele</b> | <b>Number of distinct signals</b> | <b>Sequential Conditioning Lead Variants</b> |
|---------------|---------------------|----------------------------------------------|----------------|-------------|--------------------------------|----------------------|-----------------------------------|----------------------------------------------|
| <i>LEPR</i>   | rs6588153           | intronic                                     | 6.5E-16        | -0.10       | 0.37                           | A                    | 1                                 |                                              |
| <i>IL6R</i>   | rs61812598          | intronic                                     | 1.8E-07        | -0.06       | 0.40                           | A                    | 1                                 |                                              |
| <i>CRP</i>    | rs2211320           | intergenic                                   | 7.7E-39        | -0.16       | 0.32                           | A                    | 4                                 | rs4425982,<br>rs553202904,<br>rs1800947      |
| <i>NLRP3</i>  | rs10157379          | intronic                                     | 1.1E-05        | 0.05        | 0.62                           | T                    | 0                                 |                                              |
| <i>GCKR</i>   | rs1260326           | missense,<br>p.Leu446Pro<br>( <i>GCKR</i> )  | 1.2E-12        | -0.09       | 0.58                           | C                    | 1                                 |                                              |
| <i>IL1F10</i> | rs28648961          | intergenic                                   | 1.1E-07        | 0.07        | 0.40                           | A                    | 1                                 |                                              |
| <i>HNF1A</i>  | rs11065384          | intronic                                     | 1.0E-25        | 0.13        | 0.67                           | C                    | 1                                 |                                              |
| <i>APOE</i>   | rs429358            | missense,<br>p.Cys130Arg<br>( <i>APOE4</i> ) | 1.6E-42        | -0.24       | 0.13                           | C                    | 1                                 |                                              |

Analysis was performed at 8 loci (500 kb  $\pm$  genome-wide significant variants) identified in the pooled ancestry analysis. We used the same locus-wide thresholds as pooled ancestry analysis in Table 1.

**Table S2b: Lead variants and number of distinct signals in African American-specific association analysis**

| Locus         | Lead Variant | Annotation                                   | P-value | Beta  | Effect Allele Frequency | Effect Allele | Number of distinct signals | Sequential Conditioning Lead Variants                  |
|---------------|--------------|----------------------------------------------|---------|-------|-------------------------|---------------|----------------------------|--------------------------------------------------------|
| <i>LEPR</i>   | rs112200619  | intronic                                     | 1.9E-05 | -0.66 | 0.003                   | C             | 0                          |                                                        |
| <i>IL6R</i>   | rs4129267    | intronic                                     | 1.2E-06 | -0.13 | 0.14                    | T             | 1                          |                                                        |
| <i>CRP</i>    | rs112563958  | intergenic                                   | 8.6E-43 | 0.32  | 0.17                    | T             | 5                          | rs4428887,<br>rs3122014,<br>rs11265259,<br>rs181704186 |
| <i>NLRP3</i>  | rs56188865   | intronic                                     | 1.1E-07 | -0.09 | 0.52                    | C             | 1                          |                                                        |
| <i>GCKR</i>   | rs556974380  | intergenic                                   | 8.0E-04 | 0.50  | 0.003                   | C             | 0                          |                                                        |
| <i>IL1F10</i> | rs6734238    | intergenic                                   | 2.2E-06 | 0.08  | 0.45                    | G             | 1                          |                                                        |
| <i>HNF1A</i>  | rs1169284    | intronic                                     | 3.6E-06 | -0.10 | 0.24                    | C             | 1                          |                                                        |
| <i>APOE</i>   | rs429358     | missense,<br>p.Cys130Arg<br>( <i>APOE4</i> ) | 1.3E-21 | -0.21 | 0.21                    | C             | 1                          |                                                        |

Analysis was performed at 8 loci (500 kb  $\pm$  genome-wide significant variants) identified in the pooled ancestry analysis. We used the same locus-wide thresholds as pooled ancestry analysis in Table 1.

**Table S3: Results from African American and European American stratified analyses for eight signals detected at *CRP* locus in pooled ancestry results (unconditioned).**

| Signal   | Variant     | Beta EA | P-value EA | EAF EA | Beta AA | P-value AA | EAF AA | LD with EA leads                                   | LD with AA leads                                   |
|----------|-------------|---------|------------|--------|---------|------------|--------|----------------------------------------------------|----------------------------------------------------|
| <b>A</b> | rs7551731   | -0.16   | 2.5E-38    | 0.33   | -0.21   | 2.5E-23    | 0.22   | r <sup>2</sup> =0.93 with rs2211320, lead signal   | r <sup>2</sup> =0.89 with rs4428887, second signal |
| <b>B</b> | rs73024795  | NA      | NA         | 0.0005 | 0.33    | 2.5E-42    | 0.16   |                                                    | r <sup>2</sup> =0.70 with rs112563958, lead signal |
| <b>C</b> | rs2211321   | 0.03    | 5.2E-02    | 0.71   | -0.11   | 4.9E-09    | 0.65   | r <sup>2</sup> =0.98 with rs4425982, fourth signal | r <sup>2</sup> =0.36 with rs3122014, third signal  |
| <b>D</b> | rs553202904 | -0.71   | 8.2E-12    | 0.0031 | NA      | NA         | 0.0004 | Third signal                                       |                                                    |
| <b>E</b> | rs11265259  | NA      | NA         | 0.0004 | -0.17   | 7.3E-08    | 0.09   |                                                    | Fourth signal                                      |
| <b>F</b> | rs1800947   | -0.24   | 1.7E-22    | 0.06   | -0.29   | 4.6E-04    | 0.01   | Second signal                                      |                                                    |
| <b>G</b> | rs12734907  | 0.10    | 5.8E-16    | 0.34   | -0.04   | 0.27       | 0.08   |                                                    |                                                    |
| <b>H</b> | rs181704186 | NA      | NA         | 0.0001 | -0.59   | 3.9E-10    | 0.01   |                                                    | Fifth signal                                       |

We also list the linkage disequilibrium (if  $r^2 > 0.2$ ) between the eight *CRP* locus lead variants from the ancestry pooled analysis with the lead *CRP* locus variants identified in ancestry stratified *CRP* locus conditional analyses. Five locus-wide significant variants were identified at the *CRP* locus in African Americans, and four locus-wide significant variants were identified at *CRP* in European Americans. Abbreviations: AA, African American; EA, European American; EAF, effect allele frequency; LD, linkage disequilibrium with ancestry stratified conditional analysis results, from European (EUR) (for EA individuals) or African (AFR) (for AA individuals) 1000 Genomes phase 1; NA, not applicable (did not meet 0.1% minor allele frequency threshold). Effect alleles are listed in Table 2.

**Table S4: Previous genome-wide significant variants at the C-reactive protein (CRP) locus used for conditional analyses**

| Variant     | Position (Chr 1; GRCh38) | Reference        | Included in conditional analysis?                      | r <sup>2</sup> <0.9 with other previously identified variants |
|-------------|--------------------------|------------------|--------------------------------------------------------|---------------------------------------------------------------|
| rs3027012   | 159,204,333              | <sup>5</sup>     | Yes                                                    | No                                                            |
| rs56288844  | 159,330,024              | <sup>5</sup>     | Yes                                                    | No                                                            |
| rs6695494   | 159,603,761              | <sup>5</sup>     | Yes                                                    | No                                                            |
| rs149520992 | 159,697,727              | <sup>5</sup>     | Yes                                                    | No                                                            |
| rs72698571  | 159,701,146              | <sup>5</sup>     | Yes                                                    | No                                                            |
| rs12029262  | 159,709,406              | <sup>5</sup>     | Yes                                                    | No                                                            |
| rs3091244   | 159,714,875              | <sup>5-7</sup>   | No (FAIL variant-adjusted for in sensitivity analysis) | -                                                             |
| rs2246469   | 159,721,022              | <sup>5</sup>     | Yes                                                    | No                                                            |
| rs141729353 | 159,734,040              | <sup>5</sup>     | Yes                                                    | Yes-kept, removed LD proxies                                  |
| rs11265263  | 159,740,727              | <sup>5</sup>     | Yes                                                    | No                                                            |
| rs4131568   | 159,752,266              | <sup>5</sup>     | Yes                                                    | No                                                            |
| rs3845624   | 159,248,476              | <sup>8</sup>     | Yes                                                    | No                                                            |
| rs16842484  | 159,677,134              | <sup>6</sup>     | Yes                                                    | No                                                            |
| rs12093699  | 159,678,198              | <sup>9</sup>     | Yes                                                    | No                                                            |
| rs10494326  | 159,679,910              | <sup>10</sup>    | Yes                                                    | No                                                            |
| rs2592887   | 159,683,149              | <sup>6</sup>     | Yes                                                    | No                                                            |
| rs726640    | 159,685,728              | <sup>11</sup>    | Yes                                                    | No                                                            |
| rs2592902   | 159,685,936              | <sup>12</sup>    | Yes                                                    | Yes-removed                                                   |
| rs876537    | 159,705,143              | <sup>13</sup>    | Yes                                                    | Yes- kept, removed LD proxies                                 |
| rs16842559  | 159,706,381              | <sup>14</sup>    | Yes                                                    | Yes-removed                                                   |
| rs2794520   | 159,709,026              | <sup>15</sup>    | Yes                                                    | Yes- kept, removed LD proxies                                 |
| rs1800947   | 159,713,648              | <sup>5, 16</sup> | Yes                                                    | No                                                            |
| rs77832441  | 159,714,024              | <sup>16</sup>    | Yes                                                    | No                                                            |
| rs3093059   | 159,715,346              | <sup>17</sup>    | Yes                                                    | Yes- kept, removed LD proxies                                 |
| rs1341665   | 159,721,769              | <sup>8</sup>     | Yes                                                    | Yes- removed                                                  |
| rs2808634   | 159,722,783              | <sup>10</sup>    | Yes                                                    | Yes-removed                                                   |
| rs7553007   | 159,728,759              | <sup>10</sup>    | Yes                                                    | Yes- removed                                                  |
| rs11265260  | 159,730,249              | <sup>18</sup>    | Yes                                                    | Yes- removed                                                  |

Previously identified variants were identified through review of the literature (particularly <sup>5, 19</sup>). A previously reported tri-allelic variant and the lead *CRP* locus SNP from a multi-ethnic PAGE fine-mapping effort, rs3091244, failed the variant quality filter in TOPMed. We adjusted for the variant calls that were available in a sensitivity analysis, additionally adjusting for all previously identified *CRP* locus variants, and signals E and H from Table 2 remained unchanged ( $\beta = -0.32$ ,  $p = 7.09 \times 10^{-18}$  for rs11265259,  $\beta = -0.47$ ,  $p = 2.89 \times 10^{-7}$  for rs181704186). This variant is also common across ancestry groups and not in high LD with either signal E or H in African ancestry individuals from TOPMed or 1000 Genomes.



We also performed a conditional analysis adjusting only for previously identified *CRP* locus variants with linkage disequilibrium  $r^2 < 0.9$  (as assessed in AA and EA ancestry samples used in TOPMed *CRP* analysis) with any other previously identified *CRP* variant to prevent potential problems with collinearity. Both signals E and H from Table 2 were still significant in the pooled analysis ( $\beta = -0.29$ ,  $p = 3.57 \times 10^{-16}$  for rs11265259,  $\beta = -0.47$ ,  $p = 2.55 \times 10^{-7}$  for rs181704186), and in African Americans alone ( $\beta = -0.28$ ,  $p = 3.13 \times 10^{-13}$  for rs11265259,  $\beta = -0.49$ ,  $p = 4.64 \times 10^{-6}$  for rs181704186).

Abbreviations: LD, linkage disequilibrium.

**Table S5: Previous genome-wide significant variants at the HNF1 Homeobox A (*HNF1A*) locus used for conditional analyses.**

| Variant   | Position (Chr 12; GRCh38) | Reference        | Included in conditional analysis? | $r^2 < 0.9$ with other previously identified variants |
|-----------|---------------------------|------------------|-----------------------------------|-------------------------------------------------------|
| rs1039302 | 120,798,455               | <sup>20</sup>    | Yes                               | No                                                    |
| rs2650000 | 120,951,159               | <sup>21</sup>    | Yes                               | No                                                    |
| rs7305618 | 120,965,129               | <sup>13</sup>    | Yes                               | No                                                    |
| rs7953249 | 120,965,921               | <sup>22</sup>    | Yes                               | No                                                    |
| rs7979473 | 120,982,457               | <sup>6; 10</sup> | No-FAIL variant                   |                                                       |
| rs1183910 | 120,983,004               | <sup>23</sup>    | Yes                               | No                                                    |
| rs2393791 | 120,986,153               | <sup>24</sup>    | Yes                               | Yes-kept, removed LD proxies                          |
| rs7310409 | 120,987,058               | <sup>5; 17</sup> | Yes                               | Yes-removed                                           |
| rs2259816 | 120,997,784               | <sup>10</sup>    | Yes                               | Yes-kept, removed LD proxies                          |
| rs1169310 | 121,001,630               | <sup>18</sup>    | Yes                               | Yes-removed                                           |
| rs2259883 | 121,024,336               | <sup>5</sup>     | Yes                               | No                                                    |

Previously identified variants were identified through review of the literature (particularly <sup>5; 19</sup>). One previously reported variant was not available for conditional analysis at the *HNF1A* locus (rs7979473<sup>10</sup>), as it failed variant quality filters. However, since both *HNF1A* signals in our analysis were attenuated to non-significance (post-conditioning lead variant rs544759708,  $p = 2.69 \times 10^{-5}$ ,  $\beta = -0.46$ ) even without adjusting for this variant, we did not pursue further conditional analysis adjusting for fail variants. We also did not condition on secondary signal rs2243616 from <sup>6</sup>, as it did not meet a conventional genome-wide significance threshold.

We did perform a conditional analysis adjusting only for previously identified *HNF1A* locus variants with linkage disequilibrium  $r^2 < 0.9$  (as assessed in AA and EA ancestry samples used in TOPMed CRP analysis) with any other previously identified *HNF1A* variant to prevent potential problems with collinearity. Results were unchanged (post-conditioning lead variant rs544759708,  $p = 2.69 \times 10^{-5}$ ,  $\beta = -0.46$ ).

Abbreviations: LD, linkage disequilibrium.

**Table S6: Linkage disequilibrium between rs11265259 and rs181704186 and previously reported CRP locus variants, as well as other signals from TOPMed conditional analysis, in African Americans from the TOPMed CRP analysis**

| SNP_A                      | SNP_B                       | r <sup>2</sup> | D'   | Source              |
|----------------------------|-----------------------------|----------------|------|---------------------|
| 1:159706154_T/C_rs11265259 | 1:159724989_T/C_rs7551731   | 0.028          | 1    | Signal A, our paper |
| 1:159706154_T/C_rs11265259 | 1:159732996_C/T_rs73024795  | 0.018          | 1    | Signal B, our paper |
| 1:159706154_T/C_rs11265259 | 1:159723932_T/C_rs2211321   | 0.051          | 1    | Signal C, our paper |
| 1:159706154_T/C_rs11265259 | 1:159738205_A/G_rs553202904 | 3.63E-05       | 1    | Signal D, our paper |
| 1:159706154_T/C_rs11265259 | 1:159706154_T/C_rs11265259  | 1              | 1    | Signal E, our paper |
| 1:159706154_T/C_rs11265259 | 1:159713648_C/G_rs1800947   | 0.001          | 1    | Signal F, our paper |
| 1:159706154_T/C_rs11265259 | 1:159749804_A/T_rs12734907  | 0.008          | 1    | Signal G, our paper |
| 1:159706154_T/C_rs11265259 | 1_159204333_T_C             | 0.004          | 1    | rs3027012           |
| 1:159706154_T/C_rs11265259 | 1_159248476_A_C             | 0.013          | 0.97 | rs3845624           |
| 1:159706154_T/C_rs11265259 | 1_159330024_A_G             | 1.75E-04       | 1    | rs56288844          |
| 1:159706154_T/C_rs11265259 | 1_159603761_T_C             | 0.007          | 0.31 | rs6695494           |
| 1:159706154_T/C_rs11265259 | 1_159677134_C_T             | 0.114          | 0.72 | rs16842484          |
| 1:159706154_T/C_rs11265259 | 1_159678198_A_G             | 0.127          | 0.77 | rs12093699          |
| 1:159706154_T/C_rs11265259 | 1_159679910_T_C             | 0.020          | 0.97 | rs10494326          |
| 1:159706154_T/C_rs11265259 | 1_159683149_T_C             | 0.086          | 0.90 | rs2592887           |
| 1:159706154_T/C_rs11265259 | 1_159685728_A_G             | 0.018          | 0.98 | rs726640            |
| 1:159706154_T/C_rs11265259 | 1_159685936_T_G             | 0.029          | 0.96 | rs2592902           |
| 1:159706154_T/C_rs11265259 | 1_159697727_T_C             | 1.01E-06       | 0.09 | rs149520992         |
| 1:159706154_T/C_rs11265259 | 1_159701146_T_C             | 9.21E-04       | 0.77 | rs72698571          |
| 1:159706154_T/C_rs11265259 | 1_159705143_T_C             | 0.025          | 1    | rs876537            |
| 1:159706154_T/C_rs11265259 | 1_159706381_C_T             | 0.003          | 0.97 | rs16842559          |
| 1:159706154_T/C_rs11265259 | 1_159709026_T_C             | 0.026          | 1    | rs2794520           |
| 1:159706154_T/C_rs11265259 | 1_159709406_C_G             | 0.004          | 1    | rs12029262          |
| 1:159706154_T/C_rs11265259 | 1_159714024_A_G             | 3.63E-05       | 1    | rs77832441          |
| 1:159706154_T/C_rs11265259 | 1_159715346_G_A             | 0.271          | 1    | rs3093059           |
| 1:159706154_T/C_rs11265259 | 1_159721022_A_G             | 0.051          | 0.98 | rs2246469           |
| 1:159706154_T/C_rs11265259 | 1_159721769_A_G             | 0.026          | 1    | rs1341665           |
| 1:159706154_T/C_rs11265259 | 1_159722783_T_C             | 0.017          | 1    | rs2808634           |
| 1:159706154_T/C_rs11265259 | 1_159728759_A_G             | 0.028          | 1    | rs7553007           |
| 1:159706154_T/C_rs11265259 | 1_159730249_G_A             | 0.007          | 1    | rs11265260          |
| 1:159706154_T/C_rs11265259 | 1_159734040_C_T             | 0.021          | 1    | rs141729353         |
| 1:159706154_T/C_rs11265259 | 1_159740727_A_C             | 0.003          | 1    | rs11265263          |
| 1:159706154_T/C_rs11265259 | 1_159752266_T_C             | 0.008          | 1    | rs4131568           |

|                             |                             |          |       |                     |
|-----------------------------|-----------------------------|----------|-------|---------------------|
| 1:159752293_A/G_rs181704186 | 1:159724989_T/C_rs7551731   | 0.027    | 0.96  | Signal A, our paper |
| 1:159752293_A/G_rs181704186 | 1:159732996_C/T_rs73024795  | 0.001    | 0.93  | Signal B, our paper |
| 1:159752293_A/G_rs181704186 | 1:159723932_T/C_rs2211321   | 0.003    | 0.85  | Signal C, our paper |
| 1:159752293_A/G_rs181704186 | 1:159738205_A/G_rs553202904 | 0.002    | 0.19  | Signal D, our paper |
| 1:159752293_A/G_rs181704186 | 1:159706154_T/C_rs11265259  | 0.001    | 1     | Signal E, our paper |
| 1:159752293_A/G_rs181704186 | 1:159713648_C/G_rs1800947   | 8.74E-06 | 0.003 | Signal F, our paper |
| 1:159752293_A/G_rs181704186 | 1:159749804_A/T_rs12734907  | 0.001    | 1     | Signal G, our paper |
| 1:159752293_A/G_rs181704186 | 1_159204333_T_C             | 3.49E-04 | 1     | rs3027012           |
| 1:159752293_A/G_rs181704186 | 1_159248476_A_C             | 0.001    | 1     | rs3845624           |
| 1:159752293_A/G_rs181704186 | 1_159330024_A_G             | 1.31E-04 | 0.02  | rs56288844          |
| 1:159752293_A/G_rs181704186 | 1_159603761_T_C             | 0.007    | 0.78  | rs6695494           |
| 1:159752293_A/G_rs181704186 | 1_159677134_C_T             | 0.003    | 0.93  | rs16842484          |
| 1:159752293_A/G_rs181704186 | 1_159678198_A_G             | 0.003    | 0.92  | rs12093699          |
| 1:159752293_A/G_rs181704186 | 1_159679910_T_C             | 0.002    | 1     | rs10494326          |
| 1:159752293_A/G_rs181704186 | 1_159683149_T_C             | 0.009    | 0.96  | rs2592887           |
| 1:159752293_A/G_rs181704186 | 1_159685728_A_G             | 0.001    | 0.86  | rs726640            |
| 1:159752293_A/G_rs181704186 | 1_159685936_T_G             | 0.022    | 0.92  | rs2592902           |
| 1:159752293_A/G_rs181704186 | 1_159697727_T_C             | 2.41E-04 | 0.04  | rs149520992         |
| 1:159752293_A/G_rs181704186 | 1_159701146_T_C             | 1.78E-05 | 0.35  | rs72698571          |
| 1:159752293_A/G_rs181704186 | 1_159705143_T_C             | 0.028    | 0.92  | rs876537            |
| 1:159752293_A/G_rs181704186 | 1_159706381_C_T             | 9.77E-05 | 0.02  | rs16842559          |
| 1:159752293_A/G_rs181704186 | 1_159709026_T_C             | 0.028    | 0.93  | rs2794520           |
| 1:159752293_A/G_rs181704186 | 1_159709406_C_G             | 0.198    | 0.94  | rs12029262          |
| 1:159752293_A/G_rs181704186 | 1_159714024_A_G             | 0.002    | 0.19  | rs77832441          |
| 1:159752293_A/G_rs181704186 | 1_159715346_G_A             | 0.003    | 1     | rs3093059           |
| 1:159752293_A/G_rs181704186 | 1_159721022_A_G             | 0.014    | 0.94  | rs2246469           |
| 1:159752293_A/G_rs181704186 | 1_159721769_A_G             | 0.029    | 0.96  | rs1341665           |
| 1:159752293_A/G_rs181704186 | 1_159722783_T_C             | 0.002    | 1     | rs2808634           |
| 1:159752293_A/G_rs181704186 | 1_159728759_A_G             | 0.027    | 0.96  | rs7553007           |
| 1:159752293_A/G_rs181704186 | 1_159730249_G_A             | 2.57E-05 | 0.01  | rs11265260          |
| 1:159752293_A/G_rs181704186 | 1_159734040_C_T             | 0.002    | 1     | rs141729353         |
| 1:159752293_A/G_rs181704186 | 1_159740727_A_C             | 2.37E-04 | 1     | rs11265263          |
| 1:159752293_A/G_rs181704186 | 1_159752266_T_C             | 7.39E-04 | 1     | rs4131568           |

**Table S7: Women's Health Initiative (WHI) replication analysis**

| Variant     | Beta  | P-value               | Effect Allele | Effect Allele Frequency | Beta, Post Conditioning | P-value, Post Conditioning | Effect Allele Frequency, 1000G | Beta, 1000G | P-value, 1000G        | Beta, Post Conditioning, 1000G | P-value, Post Conditioning, 1000G |
|-------------|-------|-----------------------|---------------|-------------------------|-------------------------|----------------------------|--------------------------------|-------------|-----------------------|--------------------------------|-----------------------------------|
| rs11265259  | -0.18 | 6.1x10 <sup>-9</sup>  | C             | 0.08                    | -0.26                   | 8.7x10 <sup>-12</sup>      | 0.08                           | -0.17       | 1.3 x10 <sup>-7</sup> | -0.23                          | 2.1 x10 <sup>-9</sup>             |
| rs181704186 | -0.58 | 9.2x10 <sup>-11</sup> | G             | 0.009                   | -0.45                   | 9.7x10 <sup>-6</sup>       | 0.008                          | -0.62       | 7.1x10 <sup>-11</sup> | -0.50                          | 2.2 x10 <sup>-6</sup>             |

Conditional analysis was done conditioning on all variants in Table S4. Imputation was performed to TOPMed freeze 5b, using the Michigan Imputation Server. Imputation quality was  $r^2=0.94$  and  $r^2=0.95$  for rs181704186 and  $r^2=0.92$  and  $r^2=0.90$  for rs11265259, in two separately analyzed subsets of WHI Affymetrix 6.0 data (one in participants overlapping the Population Architecture using Genomics and Epidemiology (PAGE) MEGA array study (n= 4685) which would have been included in <sup>19</sup>, the rest (n=2423) with Affymetrix data only). Imputation quality for all included variants in the conditional analysis was  $\geq 0.6$ . For the 1000G phase 3 imputation, imputation quality was  $r^2=0.83$  and  $r^2=0.86$  for rs181704186 and  $r^2=0.77$  and  $r^2=0.81$  for rs11265259. Results from the subsets were meta-analyzed with metal (2011-03-25 version).

**Table S8a: FUN-LDA tissue specific annotation scores for *CRP* locus variants (signals E and H from Table 2), with top two tissues as well as any additional tissues with an annotation score >0.9 listed.**

| Epigenome Dataset | Full Name                                              | Score   | SNP         | Label         |
|-------------------|--------------------------------------------------------|---------|-------------|---------------|
| E066              | Liver                                                  | 0.0746  | rs11265259  | CRP, Signal E |
| E042              | Primary T helper 17 cells PMA-I stimulated             | 0.00006 |             |               |
| E066              | Liver                                                  | 1       | rs181704186 | CRP, Signal H |
| E023              | Mesenchymal Stem Cell Derived Adipocyte Cultured Cells | 0.99977 |             |               |
| E117              | HeLa-S3 Cervical Carcinoma Cell Line                   | 0.99907 |             |               |
| E025              | Adipose Derived Mesenchymal Stem Cell Cultured Cells   | 0.98627 |             |               |
| E030              | Primary neutrophils from peripheral blood              | 0.9787  |             |               |

**Table S8b: Annotation PCs for *CRP* locus variants (signals E and H from Table 2)**

| rsID        | Epigenetics | Conservation | Protein Function | Negative Selection | Distance to Nearest Coding Variant | Mutation Density | Transcription Factor |
|-------------|-------------|--------------|------------------|--------------------|------------------------------------|------------------|----------------------|
| rs11265259  | 6.1         | 18.8         | 3.0              | 2.2                | 1.1                                | 5.0              | 9.2                  |
| rs181704186 | 10.0        | 16.3         | 3.0              | 3.3                | 0.3                                | 6.4              | 18.0                 |

As further described in the methods, we used a novel, multi-dimensional annotation pipeline to derive annotation PCs from individual functional annotations in the following categories: epigenetics, conservation, protein function, negative selection, distance to coding variants, mutation density, and transcription factor binding. Variant-specific annotation PCs are given as the PHRED-scaled scores from the first principal component of the category's individual annotations.

**Table S9a: 95% Credible Set Variants for *CRP* locus in European Americans, derived using FINEMAP.**

| Variants in Credible Set (4 causal variant setting) |                             |
|-----------------------------------------------------|-----------------------------|
| 1:159727120_G/C_rs3116653                           | 1:159685936_G/T_rs2592902   |
| 1:159728695_C/T_rs3116651                           | 1:159690923_GA/G_rs60702037 |
| 1:159731554_C/T_rs3116655                           | 1:159695286_TAA/T_rs3039321 |
| 1:159732697_G/A_rs12727021                          | 1:159696131_C/G_rs2808624   |
| 1:159743672_A/G_rs74596724                          | 1:159699194_C/T_rs11265257  |
| 1:159744970_G/A_rs4656848                           | 1:159705143_C/T_rs876537    |
| 1:159748522_A/G_rs4255379                           | 1:159713301_G/A_rs1130864   |
| 1:159750926_G/A_rs4420078                           | 1:159713648_C/G_rs1800947   |
| 1:159753330_T/C_rs6677719                           | 1:159716693_G/A_rs3116636   |
| 1:159753731_G/A_rs4656849                           | 1:159716703_A/G_rs3116635   |
| 1:159754730_T/C_rs11265268                          | 1:159719533_T/C_rs3122012   |
| 1:159759547_G/C_rs4433388                           | 1:159722054_C/CT_rs35625772 |
| 1:159760689_G/T_rs7418263                           | 1:159723815_G/A_rs2211320   |

**Table S9b: 95% Credible Set Variants for *CRP* locus in African Americans, derived using FINEMAP.**

| Variants in Credible Set (5 causal variant setting) |
|-----------------------------------------------------|
| 1:159718685_C/T_rs2808633                           |
| 1:159723031_G/A_rs2794518                           |
| 1:159723932_C/T_rs2211321                           |
| 1:159730897_G/A_rs10797053                          |
| 1:159741019_G/C_rs10437340                          |
| 1:159743435_A/T_rs12083620                          |
| 1:159758337_T/C_rs11265269                          |

**Table S10: Oligonucleotide sequences for functional assays. Forward and reverse oligonucleotides indicate forward or reverse directions (5'-3') with respect to the genome.**

| <b>PCR primers for reporter assays</b>     | <b>Sequence (5'-3')</b>                      | <b>Region (hg19)</b>         |
|--------------------------------------------|----------------------------------------------|------------------------------|
| rs181704186 Forward<br>rs181704186 Reverse | TTCATGGGGCAGATGATACA<br>GGCATGTTGTCTTGCAGGTA | chr1:159,721,514-159,722,654 |
| <b>Oligonucleotide sequences for EMSAs</b> |                                              |                              |
| rs181704186 Forward<br>rs181704186 Reverse | AGTTGCACA/GATGGGAGG<br>CCTCCATT/CGTGCAACT    | chr1:159,722,075-159,722,091 |



## Supplemental Materials and Methods

### *Statistical Analysis*

Our analysis included 23,279 individuals [average age 59.2 years; 32% male; predominantly European (64.7%) and African American (28.1%) ancestry] from nine cohorts. Inverse-normalized natural log-transformed CRP values were assessed. Models were adjusted for sex, age, study, and self-reported ancestry, as well as ten cross-cohort ancestry principal components calculated from 228,497 LD pruned variants ( $r^2 < 0.1$  across all freeze 5b individuals) with a minor allele frequency  $> 1\%$ . For each cohort, basic demographic, self-reported ancestry sub-group, and assay information is displayed in Table S1. Individuals with raw CRP levels of zero or residual values more than 3 standard deviations outside the mean were excluded.

We analyzed variants and indels with a minor allele frequency  $> 0.1\%$  (corresponding to a minor allele count  $> 46$  in our pooled ancestry sample) using WGS data from freeze 5b (see <https://www.nhlbiwgs.org/topmed-whole-genome-sequencing-project-freeze-5b-phases-1-and-2> and preprint at<sup>25</sup> for sequencing and variant calling methods). We used EPACTS (v3.3.3) on the University of Michigan ENCORE server for initial analyses with EMMAX to control for sample relatedness. Stepwise conditional analysis at each identified locus was performed locally using the same EPACTS version. Loci were declared significant at a threshold of  $p < 1 \times 10^{-9}$  based on estimated number of independent tests for whole genome sequencing data<sup>26</sup>. Within an identified locus (500 kb on each side of any variant with  $p < 1 \times 10^{-9}$ ), we defined a Bonferroni corrected p-value threshold based on the number of tested variants. This threshold is conservative given the correlation between variants within a locus, but increases our confidence in the robustness of identified distinct signals. We then performed stepwise conditional analysis to define the number of conditionally distinct signals at each locus, defined as the number of rounds of conditional analysis needed to have no variants within the locus with a p-values lower than the locus threshold. We also performed analyses adjusting for variants previously attaining genome-wide significance at the *CRP* (Table S4) and *HNF1A* loci (Table S5). Conditional analyses at the *CRP* locus were visualized using LocusZoom, using linkage disequilibrium calculated from included TOPMed subjects<sup>27</sup>.

We performed statistical fine-mapping with FINEMAP (v1.3.1)<sup>28</sup> using marginal test statistics and TOPMed derived LD reference panels in unrelated EA and AA participants from TOPMed (selected from individuals included in TOPMed CRP analysis using PC-air,  $n=4,442$  AAs,  $n=11,397$  EAs). We chose FINEMAP specifically because it permits a large number of potential causal variants at a locus. At the CRP locus, we input a maximum of 5 causal variants in our sample of AAs and 4 causal variants in EAs, based on the number of conditionally distinct signals from stepwise conditional analysis.

### *Annotation*

For signals E and H, we used the FUN-LDA program (functional effect prediction for noncoding variants, using a latent Dirichlet allocation model) to identify the tissue type in which they were most likely to have a functional effect<sup>29</sup>. This program gives each variant a score ranging from 0 to 1 (with higher scores indicating variants that are most likely to be functional) based on epigenetic assays evidence, with scores available for 127 cell types and tissues in Roadmap Epigenomics. FUN-LDA scores are derived by summing posterior probabilities for active functional classes (such as promoters and enhancers), based on histone modifications and quantitative DNase hypersensitivity.

We also used a novel, multi-dimensional annotation pipeline, which derives annotation PCs from individual functional annotations in the following categories: epigenetics, conservation, protein function, negative selection, distance to coding variants, mutation

density, and transcription factor binding. Variant-specific annotation PCs are given as the PHRED-scaled scores from the first principal component of the category's individual annotations. Values greater than 10 thus represent variants in the top 10% of a given annotation category. We report the epigenetic PC calculated from individual annotations percent GC within +/- 75bp window, percent CpG within +/- 75bp window, maximum Encode H3K4me1 level, maximum Encode H3K4me2 level, maximum Encode H3K4me3 level, maximum Encode H3K9ac level, maximum Encode H3K9me3 level, maximum Encode H3K27ac level, maximum Encode H3K27me3 level, maximum Encode H3K36me3, maximum Encode H3K79me2 level, maximum Encode H4K20me1 level, maximum Encode EncodeH2AFZ level, ReMap count of binding transcription factors, ReMap count of binding transcription factors for cell line combinations, distance to nearest Transcribed Sequence Start (TSS), and distance to nearest Transcribed Sequence End (TSE). We also report conservation PC calculated from the neutral evolution score of GERP++, rejected Substitution score of GERP++, primate PhastCons conservation score, mammalian PhastCons conservation score, vertebrate PhastCons conservation score, primate PhyloP score, mammalian PhyloP score, and the vertebrate PhyloP score. All annotations are drawn from CADD database<sup>30</sup>. Finally, we assessed whether lead CRP-associated variants were colocalized ( $r^2 > 0.8$  in EUR or AFR populations; 1000 Genomes phase 3) with lead variants from eQTL signals from GTEx (all tissues<sup>31</sup>) or eQTLGen (whole blood)<sup>32</sup> (<https://www.eqtlgen.org/index.html>) or a recent large adult liver eQTL analysis<sup>33</sup>. We also examined GeneHancer for enhancer/gene pairings, as determined based on scores for tissue co-expression correlation between genes and enhancer RNAs, enhancer-targeted transcription factor genes, eQTLs for variants within enhancers, and promoter capture Hi-C<sup>34</sup>.

### *Replication*

African American individuals with Affymetrix 6.0 data from the WHI<sup>35</sup> SHARe resource (dbGaP phs000386.v7.p3) were imputed using TOPMed freeze 5b as a reference panel. We then performed association analysis for inverse-normalized natural log-transformed CRP in the *CRP* region using the EMMAX test in EPACTS v3.2.6, adjusting for an empirical kinship matrix and age. We also performed an additional analysis adjusting for known *CRP* locus variants from GWAS and exome sequencing analyses.

### *PheWAS*

We additionally performed a follow-up phenome-wide association study (pheWAS) for rs181704186 and rs11265259 in BioVU. BioVU is the biobank of Vanderbilt University Medical Center (VUMC) that houses de-identified DNA samples linked to phenotypic data derived from electronic health records (EHRs) system of VUMC. DNA samples were genotyped with genome-wide arrays including the Multi-Ethnic Global (MEGA) array, and the genotype data were imputed into the HRC reference panel using the Michigan imputation server. In total, 1815 phecodes (i.e., groupings of ICD codes into clinically similar diseases or traits) were tested for association in up to 5275 African Americans. Association between each binary phecode and a SNP was assessed using logistic regression, while adjusting for covariates of age, gender, genotyping array type/batch and 10 principal components of ancestry.

### *Functional Assays*

**Cell Culture** HepG2 human liver carcinoma cells were cultured in MEM-alpha (Corning) supplemented with 10% FBS, 2 mM L-glutamine, and 1 mM sodium pyruvate. Cells were maintained at 37°C in 5% CO<sub>2</sub>.

**Transcriptional Reporter Assays** Oligonucleotide primers (Table S10) containing KpnI and XhoI restriction sites were designed to PCR-amplify a 1,141-bp region (GRCh37/hg19 –chr1:159,721,514 – 159,722,654) surrounding rs181704186. A DNA segment from an individual homozygous for rs181704186-A was amplified, digested with KpnI and XhoI, and ligated into the minimal promoter-containing luciferase reporter vector pGL4.23 (Promega). The constructs were altered to create vectors containing the low-frequency rs181704186-G allele using the QuikChange site-directed mutagenesis kit (Stratagene). Isolated clones were sequenced for genotype and fidelity.

1.3×10<sup>5</sup> HepG2 cells per well were seeded in 24-well plates. Cells were co-transfected using Lipofectamine 3000 (Life Technologies) with five independent pGL4.23 constructs and *Renilla* luciferase vector pRL-TK (Promega) to control for transfection efficiency. 48 hours post-transfection, cells were lysed with Passive Lysis Buffer (Promega) and measured for luciferase activity using the Dual-Luciferase Reporter Assay system (Promega) as directed and previously described<sup>36</sup>. Reporter assays were repeated on a second separate day and yielded comparable results.

**Electrophoretic Mobility Shift Assays** Nuclear protein was extracted from HepG2 cells using the NE-PER Nuclear and Cytoplasmic Extraction Kit (Thermo Scientific). Biotinylated and unlabeled 17-bp oligonucleotide probes (Table S10) were designed centered around rs181704186 and annealed as previously described<sup>36</sup>. Electrophoretic Mobility Shift Assays (EMSAs) were performed using the LightShift Chemiluminescent EMSA Kit (Thermo Fisher Scientific). 20 uL binding reactions containing 10 ug nuclear protein, 400 fmol labeled probe, 1x binding buffer, and 50 ng/uL poly(dI-dC) were incubated at room temperature for 25 minutes. For competition reactions, 40-fold excess of unlabeled probe was incubated in the reaction for 15 minutes prior to addition of the labeled probe, followed by 25 minutes of incubation. Gel electrophoresis and transfer, wash, and detection steps were performed as previously described<sup>37</sup>. EMSAs were carried out on a second separate day and yielded comparable results.

### **Supplemental Acknowledgements**

Whole genome sequencing (WGS) for the Trans-Omics in Precision Medicine (TOPMed) program was supported by the National Heart, Lung and Blood Institute (NHLBI). WGS for “NHLBI TOPMed: Whole Genome Sequencing and Related Phenotypes in the Framingham Heart Study” (phs000974) was performed at the Broad Institute of MIT and Harvard (3U54HG003067-12S2). WGS for “NHLBI TOPMed: The Jackson Heart Study” (phs000964) was performed at the University of Washington Northwest Genomics Center (HHSN268201100037C). WGS for “NHLBI TOPMed: Genetic Epidemiology of COPD (COPDGene) in the TOPMed Program” (phs000951) was performed at the Broad Institute (HHSN268201500014C) and the University of Washington Northwest Genomics Center [3R01HL089856-08S, Phase 2 at The Broad Institute]. WGS for “NHLBI TOPMed: Genetics of Cardiometabolic Health in the Amish” (phs000956) was performed at the Broad Institute (3R01HL121007-01S1). WGS for “NHLBI TOPMed: Trans-Omics for Precision Medicine Whole Genome Sequencing Project: ARIC” (phs001211) was performed at Baylor and the Broad Institute [3R01HL092577-06S1 (The Broad Institute, AFGen), HHSN268201500015C (Baylor, VTE), 3U54HG003273-12S2 (Baylor, VTE)]. WGS for “NHLBI TOPMed: GeneSTAR (Genetic Study of Atherosclerosis Risk)” (phs001218) was performed at Macrogen (3R01HL112064-04S1), Illumina (R01HL112064), and the Broad Institute [HHSN268201500014C (The Broad Institute, AA\_CAC)].

WGS for “NHLBI TOPMed: MESA and MESA Family AA-CAC” (phs001416) was performed at the Broad Institute [3U54HG003067-13S1 (MESA, TOPMed supplement to NHGRI), HHSN268201500014C (The Broad Institute, AA\_CAC)]. WGS for “NHLBI TOPMed: Women's Health Initiative (WHI)” (phs001237) was performed at the Broad Institute (HHSN268201500014C). WGS for “NHLBI TOPMed: The Cleveland Family Study (WGS)” (phs000954) was performed at the University of Washington Northwest Genomics Center (3R01HL098433-05S1). Centralized read mapping and genotype calling along with variant quality metrics and filtering were provided by the TOPMed Informatics Research Center (3R01HL-117626-02S1; contract HHSN268201800002I). Phenotype harmonization, data management, sample-identity QC, and general study coordination, were provided by the TOPMed Data Coordinating Center (3R01HL-120393-02S1; contract HHSN268201800001I). We gratefully acknowledge the studies and participants who provided biological samples and data for TOPMed.

The WHI program is funded by the National Heart, Lung, and Blood Institute, National Institutes of Health, U.S. Department of Health and Human Services through contracts HHSN268201100046C, HHSN268201100001C, HHSN268201100002C, HHSN268201100003C, HHSN268201100004C, and HHSN271201100004C. The authors thank the WHI investigators and staff for their dedication, and the study participants for making the program possible. A listing of WHI investigators can be found at: <https://www.whi.org/researchers/Documents%20%20Write%20a%20Paper/WHI%20Investigator%20Long%20List.pdf>.

The Jackson Heart Study (JHS) is supported and conducted in collaboration with Jackson State University (HHSN268201800013I), Tougaloo College (HHSN268201800014I), the Mississippi State Department of Health (HHSN268201800015I/HHSN26800001) and the University of Mississippi Medical Center (HHSN268201800010I, HHSN268201800011I and HHSN268201800012I) contracts from the National Heart, Lung, and Blood Institute (NHLBI) and the National Institute for Minority Health and Health Disparities (NIMHD). The authors also wish to thank the staffs and participants of the JHS.

MESA and the MESA SHARe project are conducted and supported by the National Heart, Lung, and Blood Institute (NHLBI) in collaboration with MESA investigators. Support for MESA is provided by contracts HHSN268201500003I, N01-HC-95159, N01-HC-95160, N01-HC-95161, N01-HC-95162, N01-HC-95163, N01-HC-95164, N01-HC-95165, N01-HC-95166, N01-HC-95167, N01-HC-95168, N01-HC-95169, UL1-TR-000040, UL1-TR-001079, UL1-TR-001420, UL1-TR-001881, and DK063491. MESA Family is conducted and supported by the National Heart, Lung, and Blood Institute (NHLBI) in collaboration with MESA investigators. Support is provided by grants and contracts R01HL071051, R01HL071205, R01HL071250, R01HL071251, R01HL071258, R01HL071259, and by the National Center for Research Resources, Grant UL1RR033176. The provision of genotyping data was supported in part by the National Center for Advancing Translational Sciences, CTSI grant UL1TR001881, and the National Institute of Diabetes and Digestive and Kidney Disease Diabetes Research Center (DRC) grant DK063491 to the Southern California Diabetes Endocrinology Research Center.

The COPDGene project described was supported by Award Number U01 HL089897, U01 HL089856, R01 HL095432, and R01 HL129937 from the National Heart, Lung, and Blood Institute. The content is solely the responsibility of the authors and does not necessarily represent the official views of the National Heart, Lung, and Blood Institute or the National Institutes of Health. The

COPDGene project is also supported by the COPD Foundation through contributions made to an Industry Advisory Board comprised of AstraZeneca, Boehringer Ingelheim, GlaxoSmithKline, Novartis, Pfizer, Siemens and Sunovion. A full listing of COPDGene investigators can be found at: <http://www.copdgene.org/directory>

GeneSTAR was supported by the National Institutes of Health/National Heart, Lung, and Blood Institute (U01 HL72518, HL087698, HL112064, HL11006, HL118356) and by a grant from the National Institutes of Health/National Center for Research Resources (M01-RR000052) to the Johns Hopkins General Clinical Research Center.

The Framingham Heart Study inflammation work was supported by HHSN268201500001I, N01-HC 25195, 75N92019D00031, 1R01 HL64753, R01 HL076784, and 1 R01 AG028321.

The Cleveland Family Study has been supported by National Institutes of Health grants [R01-HL046380, KL2-RR024990, R35-HL135818, HL 046389, HL113338, R35HL135818 and R01-HL113338].

The TOPMed component of the Amish Research Program was supported by NIH grants R01 HL121007, U01 HL072515, and R01 AG18728.

The Atherosclerosis Risk in Communities study has been funded in whole or in part with Federal funds from the National Heart, Lung, and Blood Institute, National Institutes of Health, Department of Health and Human Services (contract numbers HHSN268201700001I, HHSN268201700002I, HHSN268201700003I, HHSN268201700004I and HHSN268201700005I). The authors thank the staff and participants of the ARIC study for their important contributions.

The views expressed in this manuscript are those of the authors and do not necessarily represent the views of the National Heart, Lung, and Blood Institute; the National Institutes of Health; or the U.S. Department of Health and Human Services.

Support for title page creation and format was provided by AuthorArranger, a tool developed at the National Cancer Institute.

We used the OASIS (Omics Analysis, Search and Information System) tool for initial exploration of our TOPMed association results for C-reactive protein. OASIS is a web-based platform for mining and visualizing omics association analysis results (and thus enabling the transformation of massive volumes of “results data” into a more complete understanding of biology). OASIS resources, video library and contact information available from <https://edn.som.umaryland.edu/OASIS/>.

### **Supplementary References**

1. Whelton, S.P., Roy, P., Astor, B.C., Zhang, L., Hoogeveen, R.C., Ballantyne, C.M., and Coresh, J. (2013). Elevated high-sensitivity C-reactive protein as a risk marker of the attenuated relationship between serum cholesterol and cardiovascular events at older age. The ARIC Study. American Journal of Epidemiology 178, 1076-1084.

2. Sun, W., Kechris, K., Jacobson, S., Drummond, M.B., Hawkins, G.A., Yang, J., Chen, T.-h., Quibrera, P.M., Anderson, W., Barr, R.G., et al. (2016). Common Genetic Polymorphisms Influence Blood Biomarker Measurements in COPD. *PLoS genetics* 12, e1006011.
3. Fox, E.R., Benjamin, E.J., Sarpong, D.F., Rotimi, C.N., Wilson, J.G., Steffes, M.W., Chen, G., Adeyemo, A., Taylor, J.K., Samdarshi, T.E., et al. (2008). Epidemiology, heritability, and genetic linkage of C-reactive protein in African Americans (from the Jackson Heart Study). *Am J Cardiol* 102, 835-841.
4. Mann, D.M., Shimbo, D., Cushman, M., Lakoski, S., Greenland, P., Blumenthal, R.S., Michos, E.D., Lloyd-Jones, D.M., and Muntner, P. (2013). C-reactive protein level and the incidence of eligibility for statin therapy: the multi-ethnic study of atherosclerosis. *Clinical cardiology* 36, 15-20.
5. Ligthart, S., Vaez, A., Vösa, U., Stathopoulou, M.G., de Vries, P.S., Prins, B.P., Van der Most, P.J., Tanaka, T., Naderi, E., Rose, L.M., et al. (2018). Genome Analyses of >200,000 Individuals Identify 58 Loci for Chronic Inflammation and Highlight Pathways that Link Inflammation and Complex Disorders. *The American Journal of Human Genetics* 103, 691-706.
6. Kocarnik, J.M., Richard, M., Graff, M., Haessler, J., Bien, S., Carlson, C., Carty, C.L., Reiner, A.P., Avery, C.L., Ballantyne, C.M., et al. (2018). Discovery, fine-mapping, and conditional analyses of genetic variants associated with C-reactive protein in multiethnic populations using the MetaboChip in the Population Architecture using Genomics and Epidemiology (PAGE) study. *Human molecular genetics* 27, 2940-2953.
7. Ridker, P., Pare, G., Parker, A., Zee, R., Danik, J., Buring, J., Kwiatkowski, D., Cook, N., Miletich, J., and Chasman, D. (2008). Loci related to metabolic-syndrome pathways including LEPR, HNF1A, IL6R, and GCKR associate with plasma C-reactive protein: the Women's Genome Health Study. *American journal of human genetics* 82, 1185-1192.
8. Naitza, S., Porcu, E., Steri, M., Taub, D.D., Mulas, A., Xiao, X., Strait, J., Dei, M., Lai, S., Busonero, F., et al. (2012). A genome-wide association scan on the levels of markers of inflammation in Sardinians reveals associations that underpin its complex regulation. *PLoS genetics* 8, e1002480.
9. Melzer, D., Perry, J.R., Hernandez, D., Corsi, A.M., Stevens, K., Rafferty, I., Lauretani, F., Murray, A., Gibbs, J.R., Paolisso, G., et al. (2008). A genome-wide association study identifies protein quantitative trait loci (pQTLs). *PLoS genetics* 4, e1000072.
10. Reiner A, P., Beleza, S., Franceschini, N., Auer P, L., Robinson J, G., Kooperberg, C., Peters, U., and Tang, H. (2012). Genome-wide Association and Population Genetic Analysis of C-Reactive Protein in African American and Hispanic American Women. *Am J Hum Genet* 91, 502-512.
11. Doumatey, A.P., Chen, G., Tekola Ayele, F., Zhou, J., Erdos, M., Shriner, D., Huang, H., Adeleye, J., Balogun, W., Fasanmade, O., et al. (2012). C-reactive protein (CRP) promoter polymorphisms influence circulating CRP levels in a genome-wide association study of African Americans. *Hum Mol Genet* 21, 3063-3072.
12. Williams, S.R., Hsu, F.C., Keene, K.L., Chen, W.M., Nelson, S., Southerland, A.M., Madden, E.B., Coull, B., Gogarten, S.M., Furie, K.L., et al. (2016). Shared genetic susceptibility of vascular-related biomarkers with ischemic and recurrent stroke. *Neurology* 86, 351-359.
13. Wu, Y., McDade, T.W., Kuzawa, C.W., Borja, J., Li, Y., Adair, L.S., Mohlke, K.L., and Lange, L.A. (2012). Genome-wide association with C-reactive protein levels in CLHNS: evidence for the CRP and HNF1A loci and their interaction with exposure to a pathogenic environment. *Inflammation* 35, 574-583.

14. Dorajoo, R., Li, R., Ikram, M.K., Liu, J., Froguel, P., Lee, J., Sim, X., Ong, R.T., Tay, W.T., Peng, C., et al. (2013). Are C-reactive protein associated genetic variants associated with serum levels and retinal markers of microvascular pathology in Asian populations from Singapore? *PloS one* 8, e67650.
15. Dehghan, A., Dupuis, J., Barbalic, M., Bis, J.C., Eiriksdottir, G., Lu, C., Pellikka, N., Wallaschofski, H., Kettunen, J., Henneman, P., et al. (2011). Meta-analysis of genome-wide association studies in >80 000 subjects identifies multiple loci for C-reactive protein levels. *Circulation* 123, 731-738.
16. Schick, U.M., Auer, P.L., Bis, J.C., Lin, H., Wei, P., Pankratz, N., Lange, L.A., Brody, J., Stitzel, N.O., Kim, D.S., et al. (2015). Association of exome sequences with plasma C-reactive protein levels in >9000 participants. *Hum Mol Genet* 24, 559-571.
17. Okada, Y., Takahashi, A., Ohmiya, H., Kumasaka, N., Kamatani, Y., Hosono, N., Tsunoda, T., Matsuda, K., Tanaka, T., Kubo, M., et al. (2011). Genome-wide association study for C-reactive protein levels identified pleiotropic associations in the IL6 locus. *Hum Mol Genet* 20, 1224-1231.
18. Reiner, A.P., Barber, M.J., Guan, Y., Ridker, P.M., Lange, L.A., Chasman, D.I., Walston, J.D., Cooper, G.M., Jenny, N.S., Rieder, M.J., et al. (2008). Polymorphisms of the HNF1A gene encoding hepatocyte nuclear factor-1 alpha are associated with C-reactive protein. *Am J Hum Genet* 82, 1193-1201.
19. Wojcik, G.L., Graff, M., Nishimura, K.K., Tao, R., Haessler, J., Gignoux, C.R., Highland, H.M., Patel, Y.M., Sorokin, E.P., Avery, C.L., et al. (2019). Genetic analyses of diverse populations improves discovery for complex traits. *Nature* 570, 514-518.
20. Lowe, J.K., Maller, J.B., Pe'er, I., Neale, B.M., Salit, J., Kenny, E.E., Shea, J.L., Burkhardt, R., Smith, J.G., Ji, W., et al. (2009). Genome-wide association studies in an isolated founder population from the Pacific Island of Kosrae. *PLoS genetics* 5, e1000365.
21. Kocarnik, J.M., Pendergrass, S.A., Carty, C.L., Pankow, J.S., Schumacher, F.R., Cheng, I., Durda, P., Ambite, J.L., Deelman, E., Cook, N.R., et al. (2014). Multiancestral analysis of inflammation-related genetic variants and C-reactive protein in the population architecture using genomics and epidemiology study. *Circulation Cardiovascular genetics* 7, 178-188.
22. Kim, D.K., Cho, M.H., Hersh, C.P., Lomas, D.A., Miller, B.E., Kong, X., Bakke, P., Gulsvik, A., Agusti, A., Wouters, E., et al. (2012). Genome-wide association analysis of blood biomarkers in chronic obstructive pulmonary disease. *American journal of respiratory and critical care medicine* 186, 1238-1247.
23. Elliott, P., Chambers, J.C., Zhang, W., Clarke, R., Hopewell, J.C., Peden, J.F., Erdmann, J., Braund, P., Engert, J.C., Bennett, D., et al. (2009). Genetic Loci associated with C-reactive protein levels and risk of coronary heart disease. *Jama* 302, 37-48.
24. Vinayagamoorthy, N., Hu, H.J., Yim, S.H., Jung, S.H., Jo, J., Jee, S.H., and Chung, Y.J. (2014). New variants including ARG1 polymorphisms associated with C-reactive protein levels identified by genome-wide association and pathway analysis. *PloS one* 9, e95866.
25. Taliun, D., Harris, D.N., Kessler, M.D., Carlson, J., Szpiech, Z.A., Torres, R., Taliun, S.A.G., Corvelo, A., Gogarten, S.M., Kang, H.M., et al. (2019). Sequencing of 53,831 diverse genomes from the NHLBI TOPMed Program. *bioRxiv*, 563866.
26. Pulit, S.L., de With, S.A., and de Bakker, P.I. (2017). Resetting the bar: Statistical significance in whole-genome sequencing-based association studies of global populations. *Genetic epidemiology* 41, 145-151.
27. Pruim, R.J., Welch, R.P., Sanna, S., Teslovich, T.M., Chines, P.S., Gliedt, T.P., Boehnke, M., Abecasis, G.R., and Willer, C.J. (2010). LocusZoom: regional visualization of genome-wide association scan results. *Bioinformatics* 26, 2336-2337.

28. Benner, C., Spencer, C.C., Havulinna, A.S., Salomaa, V., Ripatti, S., and Pirinen, M. (2016). FINEMAP: efficient variable selection using summary data from genome-wide association studies. *Bioinformatics* 32, 1493-1501.
29. Backenroth, D., He, Z., Kiryluk, K., Boeva, V., Pethukova, L., Khurana, E., Christiano, A., Buxbaum, J.D., and Ionita-Laza, I. (2018). FUN-LDA: A Latent Dirichlet Allocation Model for Predicting Tissue-Specific Functional Effects of Noncoding Variation: Methods and Applications. *American journal of human genetics* 102, 920-942.
30. Rentzsch, P., Witten, D., Cooper, G.M., Shendure, J., and Kircher, M. (2019). CADD: predicting the deleteriousness of variants throughout the human genome. *Nucleic acids research* 47, D886-d894.
31. Gamazon, E.R., Segre, A.V., van de Bunt, M., Wen, X., Xi, H.S., Hormozdiari, F., Ongen, H., Konkashbaev, A., Derks, E.M., Aguet, F., et al. (2018). Using an atlas of gene regulation across 44 human tissues to inform complex disease- and trait-associated variation. *Nat Genet* 50, 956-967.
32. Vösa, U., Claringbould, A., Westra, H.-J., Bonder, M.J., Deelen, P., Zeng, B., Kirsten, H., Saha, A., Kreuzhuber, R., Kasela, S., et al. (2018). Unraveling the polygenic architecture of complex traits using blood eQTL metaanalysis. *bioRxiv*, 447367.
33. Strunz, T., Grassmann, F., Gayan, J., Nahkuri, S., Souza-Costa, D., Maugeais, C., Fauser, S., Nogoceke, E., and Weber, B.H.F. (2018). A mega-analysis of expression quantitative trait loci (eQTL) provides insight into the regulatory architecture of gene expression variation in liver. *Scientific reports* 8, 5865.
34. Fishilevich, S., Nudel, R., Rappaport, N., Hadar, R., Plaschkes, I., Iny Stein, T., Rosen, N., Kohn, A., Twik, M., Safran, M., et al. (2017). GeneHancer: genome-wide integration of enhancers and target genes in GeneCards. *Database : the journal of biological databases and curation* 2017.
35. The Women's Health Initiative Study Group. (1998). Design of the Women's Health Initiative clinical trial and observational study. *Control Clin Trials* 19, 61-109.
36. Fogarty, M.P., Cannon, M.E., Vadlamudi, S., Gaulton, K.J., and Mohlke, K.L. (2014). Identification of a Regulatory Variant That Binds FOXA1 and FOXA2 at the CDC123/CAMK1D Type 2 Diabetes GWAS Locus. *PLoS genetics* 10, e1004633.
37. Roman, T.S., Cannon, M.E., Vadlamudi, S., Buchkovich, M.L., Wolford, B.N., Welch, R.P., Morken, M.A., Kwon, G.J., Varshney, A., Kursawe, R., et al. (2017). A Type 2 Diabetes-Associated Functional Regulatory Variant in a Pancreatic Islet Enhancer at the ADCY5 Locus. *Diabetes* 66, 2521-2530.

### TOPMed Banner Authors

| Name              | Institution(s)                 | Primary Department | Institution City | Institution State | Zip Code | Country |
|-------------------|--------------------------------|--------------------|------------------|-------------------|----------|---------|
| Abe, Namiko       | New York Genome Center         |                    | New York         | New York          | 10013    | US      |
| Abecasis, Gonçalo | University of Michigan         |                    | Ann Arbor        | Michigan          | 48109    | US      |
| Albert, Christine | Massachusetts General Hospital |                    | Boston           | Massachusetts     | 02114    | US      |



|                           |                                                                 |  |              |                |       |    |
|---------------------------|-----------------------------------------------------------------|--|--------------|----------------|-------|----|
| Almasy, Laura             | Children's Hospital of Philadelphia, University of Pennsylvania |  | Philadelphia | Pennsylvania   | 19104 | US |
| Alonso, Alvaro            | Emory University                                                |  | Atlanta      | Georgia        | 30322 | US |
| Ament, Seth               | University of Maryland                                          |  | Baltimore    | Maryland       | 21201 | US |
| Anderson, Peter           | University of Washington                                        |  | Seattle      | Washington     | 98195 | US |
| Anugu, Pramod             | University of Mississippi                                       |  | Jackson      | Mississippi    | 38677 | US |
| Applebaum-Bowden, Deborah | National Institutes of Health                                   |  | Bethesda     | Maryland       | 20892 | US |
| Arking, Dan               | Johns Hopkins University                                        |  | Baltimore    | Maryland       | 21218 | US |
| Arnett, Donna K           | University of Kentucky                                          |  | Lexington    | Kentucky       | 40506 | US |
| Ashley-Koch, Allison      | Duke University                                                 |  | Durham       | North Carolina | 27708 | US |
| Aslibekyan, Stella        | University of Alabama                                           |  | Birmingham   | Alabama        | 35487 | US |
| Assimes, Tim              | Stanford University                                             |  | Stanford     | California     | 94305 | US |
| Auer, Paul                | University of Wisconsin Milwaukee                               |  | Milwaukee    | Wisconsin      | 53211 | US |
| Avramopoulos, Dimitrios   | Johns Hopkins University                                        |  | Baltimore    | Maryland       | 21218 | US |
| Barnard, John             | Cleveland Clinic                                                |  | Cleveland    | Ohio           | 44195 | US |
| Barnes, Kathleen          | University of Colorado at Denver                                |  | Denver       | Colorado       | 80204 | US |
| Barr, R. Graham           | Columbia University                                             |  | New York     | New York       | 10027 | US |
| Barron-Casella, Emily     | Johns Hopkins University                                        |  | Baltimore    | Maryland       | 21218 | US |
| Beaty, Terri              | Johns Hopkins University                                        |  | Baltimore    | Maryland       | 21218 | US |
| Becker, Diane             | Johns Hopkins University                                        |  | Baltimore    | Maryland       | 21218 | US |
| Becker, Lewis             | Johns Hopkins University                                        |  | Baltimore    | Maryland       | 21218 | US |

|                    |                                                                          |                                      |               |                |           |    |
|--------------------|--------------------------------------------------------------------------|--------------------------------------|---------------|----------------|-----------|----|
| Beer, Rebecca      | National Heart, Lung, and Blood Institute, National Institutes of Health |                                      | Bethesda      | Maryland       | 20892     | US |
| Begum, Ferdouse    | Johns Hopkins University                                                 |                                      | Baltimore     | Maryland       | 21218     | US |
| Beitelshees, Amber | University of Maryland                                                   |                                      | Baltimore     | Maryland       | 21201     | US |
| Benjamin, Emelia   | Boston University, Massachusetts General Hospital                        | Boston University School of Medicine | Boston        | Massachusetts  | 02118     | US |
| Bezerra, Marcos    | Fundação de Hematologia e Hemoterapia de Pernambuco - Hemope             |                                      | Recife        |                | 52011-000 | BR |
| Bielak, Larry      | University of Michigan                                                   |                                      | Ann Arbor     | Michigan       | 48109     | US |
| Bis, Joshua        | University of Washington                                                 |                                      | Seattle       | Washington     | 98195     | US |
| Blackwell, Thomas  | University of Michigan                                                   |                                      | Ann Arbor     | Michigan       | 48109     | US |
| Blangero, John     | University of Texas Rio Grande Valley School of Medicine                 | Human Genetics                       | Brownsville   | Texas          | 78520     | US |
| Boerwinkle, Eric   | University of Texas Health at Houston                                    |                                      | Houston       | Texas          | 77225     | US |
| Bowden, Donald W.  | Wake Forest Baptist Health                                               | Department of Biochemistry           | Winston-Salem | North Carolina | 27157     | US |
| Bowler, Russell    | National Jewish Health                                                   | National Jewish Health               | Denver        | Colorado       | 80206     | US |
| Brody, Jennifer    | University of Washington                                                 |                                      | Seattle       | Washington     | 98195     | US |
| Broeckel, Ulrich   | Medical College of Wisconsin                                             |                                      | Milwaukee     | Wisconsin      | 53226     | US |
| Broome, Jai        | University of Washington                                                 |                                      | Seattle       | Washington     | 98195     | US |

|                    |                                           |                                     |                 |               |       |    |
|--------------------|-------------------------------------------|-------------------------------------|-----------------|---------------|-------|----|
| Bunting, Karen     | New York Genome Center                    |                                     | New York        | New York      | 10013 | US |
| Burchard, Esteban  | University of California, San Francisco   |                                     | San Francisco   | California    | 94143 | US |
| Buth, Erin         | University of Washington                  | Biostatistics                       | Seattle         | Washington    | 98195 | US |
| Cade, Brian        | Brigham & Women's Hospital                | Brigham and Women's Hospital        | Boston          | Massachusetts | 02115 | US |
| Cardwell, Jonathan | University of Colorado at Denver          |                                     | Denver          | Colorado      | 80204 | US |
| Carty, Cara        | Women's Health Initiative                 |                                     | Seattle         | Washington    | 98109 | US |
| Casaburi, Richard  | University of California, Los Angeles     |                                     | Los Angeles     | California    | 90095 | US |
| Casella, James     | Johns Hopkins University                  |                                     | Baltimore       | Maryland      | 21218 | US |
| Chaffin, Mark      | Broad Institute                           |                                     | Cambridge       | Massachusetts | 02142 | US |
| Chang, Christy     | University of Maryland                    |                                     | Baltimore       | Maryland      | 21201 | US |
| Chasman, Daniel    | Brigham & Women's Hospital                |                                     | Boston          | Massachusetts | 02115 | US |
| Chavan, Sameer     | University of Colorado at Denver          |                                     | Denver          | Colorado      | 80204 | US |
| Chen, Bo-Juen      | New York Genome Center                    |                                     | New York        | New York      | 10013 | US |
| Chen, Wei-Min      | University of Virginia                    |                                     | Charlottesville | Virginia      | 22903 | US |
| Chen, Yii-Der Ida  | Los Angeles Biomedical Research Institute |                                     | Charlottesville | Virginia      | 90502 | US |
| Cho, Michael       | Brigham & Women's Hospital                |                                     | Boston          | Massachusetts | 02115 | US |
| Choi, Seung Hoan   | Broad Institute                           |                                     | Cambridge       | Massachusetts | 02142 | US |
| Chuang, Lee-Ming   | National Taiwan University                | National Taiwan University Hospital | Taipei          |               | 10617 | TW |

|                      |                                                          |               |               |               |       |    |
|----------------------|----------------------------------------------------------|---------------|---------------|---------------|-------|----|
| Chung, Mina          | Cleveland Clinic                                         |               | Cleveland     | Ohio          | 44195 | US |
| Conomos, Matthew     | University of Washington                                 | Biostatistics | Seattle       | Washington    | 98115 | US |
| Cornell, Elaine      | University of Vermont                                    |               | Burlington    | Vermont       | 05405 | US |
| Correa, Adolfo       | University of Mississippi                                | Medicine      | Jackson       | Mississippi   | 39216 | US |
| Crandall, Carolyn    | University of California, Los Angeles                    |               | Los Angeles   | California    | 90095 | US |
| Crapo, James         | National Jewish Health                                   |               | Denver        | Colorado      | 80206 | US |
| Cupples, L. Adrienne | Boston University                                        |               | Boston        | Massachusetts | 02215 | US |
| Curran, Joanne       | University of Texas Rio Grande Valley School of Medicine |               | Brownsville   | Texas         | 78520 | US |
| Curtis, Jeffrey      | University of Michigan                                   |               | Ann Arbor     | Michigan      | 48109 | US |
| Custer, Brian        | Vitalant Research Institute                              |               | San Francisco | California    | 94118 | US |
| Damcott, Coleen      | University of Maryland                                   |               | Baltimore     | Maryland      | 21201 | US |
| Darbar, Dawood       | University of Illinois at Chicago                        |               | Chicago       | Illinois      | 60607 | US |
| Das, Sayantan        | University of Michigan                                   |               | Ann Arbor     | Michigan      | 48109 | US |
| David, Sean          | Stanford University                                      |               | Stanford      | California    | 94305 | US |
| Davis, Colleen       | University of Washington                                 |               | Seattle       | Washington    | 98195 | US |
| Daya, Michelle       | University of Colorado at Denver                         |               | Denver        | Colorado      | 80204 | US |
| de Andrade, Mariza   | Mayo Clinic                                              |               | Rochester     | Minnesota     | 55905 | US |
| DeBaun, Michael      | Vanderbilt University                                    |               | Nashville     | Tennessee     | 37235 | US |
| Deka, Ranjan         | University of Cincinnati                                 |               | Cincinnati    | Ohio          | 45220 | US |
| DeMeo, Dawn          | Brigham & Women's Hospital                               |               | Boston        | Massachusetts | 02115 | US |
| Devine, Scott        | University of Maryland                                   |               | Baltimore     | Maryland      | 21201 | US |

|                         |                                                          |                                          |                 |                |       |    |
|-------------------------|----------------------------------------------------------|------------------------------------------|-----------------|----------------|-------|----|
| Do, Ron                 | Icahn School of Medicine at Mount Sinai                  |                                          | New York        | New York       | 10029 | US |
| Duan, Qing              | University of North Carolina                             |                                          | Chapel Hill     | North Carolina | 27599 | US |
| Duggirala, Ravi         | University of Texas Rio Grande Valley School of Medicine |                                          | Edinburg        | Texas          | 78539 | US |
| Durda, Jon Peter        | University of Vermont                                    |                                          | Burlington      | Vermont        | 05405 | US |
| Dutcher, Susan          | Washington University in St Louis                        |                                          | St Louis        | Missouri       | 63130 | US |
| Eaton, Charles          | Brown University                                         |                                          | Providence      | Rhode Island   | 02912 | US |
| Ekunwe, Lynette         | University of Mississippi                                |                                          | Jackson         | Mississippi    | 38677 | US |
| Ellinor, Patrick        | Massachusetts General Hospital                           |                                          | Boston          | Massachusetts  | 02114 | US |
| Emery, Leslie           | University of Washington                                 |                                          | Seattle         | Washington     | 98195 | US |
| Farber, Charles         | University of Virginia                                   |                                          | Charlottesville | Virginia       | 22903 | US |
| Farnam, Leanna          | Brigham & Women's Hospital                               |                                          | Boston          | Massachusetts  | 02115 | US |
| Fingerlin, Tasha        | National Jewish Health                                   | Center for Genes, Environment and Health | Denver          | Colorado       | 80206 | US |
| Flickinger, Matthew     | University of Michigan                                   |                                          | Ann Arbor       | Michigan       | 48109 | US |
| Fornage, Myriam         | University of Texas Health at Houston                    |                                          | Houston         | Texas          | 77225 | US |
| Franceschini, Nora      | University of North Carolina                             |                                          | Chapel Hill     | North Carolina | 27599 | US |
| Fu, Mao                 | University of Maryland                                   |                                          | Baltimore       | Maryland       | 21201 | US |
| Fullerton, Stephanie M. | University of Washington                                 |                                          | Seattle         | Washington     | 98195 | US |
| Fulton, Lucinda         | Washington University in St Louis                        |                                          | St Louis        | Missouri       | 63130 | US |
| Gabriel, Stacey         | Broad Institute                                          |                                          | Cambridge       | Massachusetts  | 02142 | US |

|                          |                                                                          |  |             |              |       |    |
|--------------------------|--------------------------------------------------------------------------|--|-------------|--------------|-------|----|
| Gan, Weiniu              | National Heart, Lung, and Blood Institute, National Institutes of Health |  | Bethesda    | Maryland     | 20892 | US |
| Gao, Yan                 | University of Mississippi                                                |  | Jackson     | Mississippi  | 38677 | US |
| Gass, Margery            | Fred Hutchinson Cancer Research Center                                   |  | Seattle     | Washington   | 98109 | US |
| Gelb, Bruce              | Icahn School of Medicine at Mount Sinai                                  |  | New York    | New York     | 10029 | US |
| Geng, Xiaoqi (Priscilla) | University of Michigan                                                   |  | Ann Arbor   | Michigan     | 48109 | US |
| Germer, Soren            | New York Genome Center                                                   |  | New York    | New York     | 10013 | US |
| Gignoux, Chris           | Stanford University                                                      |  | Stanford    | California   | 94305 | US |
| Gladwin, Mark            | University of Pittsburgh                                                 |  | Pittsburgh  | Pennsylvania | 15260 | US |
| Glahn, David             | Yale University                                                          |  | New Haven   | Connecticut  | 06520 | US |
| Gogarten, Stephanie      | University of Washington                                                 |  | Seattle     | Washington   | 98195 | US |
| Gong, Da-Wei             | University of Maryland                                                   |  | Baltimore   | Maryland     | 21201 | US |
| Goring, Harald           | University of Texas Rio Grande Valley School of Medicine                 |  | San Antonio | Texas        | 78229 | US |
| Gu, C. Charles           | Washington University in St Louis                                        |  | St Louis    | Missouri     | 63130 | US |
| Guan, Yue                | University of Maryland                                                   |  | Baltimore   | Maryland     | 21201 | US |
| Guo, Xiuqing             | Los Angeles Biomedical Research Institute                                |  | Los Angeles | California   | 90502 | US |
| Haessler, Jeff           | Fred Hutchinson Cancer Research Center, Women's Health Initiative        |  | Seattle     | Washington   | 98109 | US |

|                        |                                                               |                                               |               |                |       |    |
|------------------------|---------------------------------------------------------------|-----------------------------------------------|---------------|----------------|-------|----|
| Hall, Michael          | University of Mississippi                                     |                                               | Jackson       | Mississippi    | 38677 | US |
| Harris, Daniel         | University of Maryland                                        |                                               | Baltimore     | Maryland       | 21201 | US |
| Hawley, Nicola         | Yale University                                               |                                               | New Haven     | Connecticut    | 06520 | US |
| He, Jiang              | Tulane University                                             |                                               | New Orleans   | Louisiana      | 70118 | US |
| Heavner, Ben           | University of Washington                                      | Biostatistics                                 | Seattle       | Washington     | 98195 | US |
| Heckbert, Susan        | University of Washington                                      |                                               | Seattle       | Washington     | 98195 | US |
| Hernandez, Ryan        | McGill University,<br>University of California, San Francisco |                                               |               |                |       | CA |
| Herrington, David      | Wake Forest Baptist Health                                    |                                               | Winston-Salem | North Carolina | 27157 | US |
| Hersh, Craig           | Brigham & Women's Hospital                                    | Channing Division of Network Medicine         | Boston        | Massachusetts  | 02115 | US |
| Hidalgo, Bertha        | University of Alabama                                         |                                               | Birmingham    | Alabama        | 35487 | US |
| Hixson, James          | University of Texas Health at Houston                         |                                               | Houston       | Texas          | 77225 | US |
| Hokanson, John         | University of Colorado at Denver                              |                                               | Denver        | Colorado       | 80204 | US |
| Hong, Elliott          | University of Maryland                                        |                                               | Baltimore     | Maryland       | 21201 | US |
| Hoth, Karin            | University of Iowa                                            |                                               | Iowa City     | Iowa           | 52242 | US |
| Hsiung, Chao (Agnes)   | National Health Research Institute Taiwan                     | Institute of Population Health Sciences, NHRI | Miaoli County |                | 350   | TW |
| Huston, Haley          | Blood Works Northwest                                         |                                               | Seattle       | Washington     | 98105 | US |
| Hwu, Chii Min          | Taichung Veterans General Hospital Taiwan                     |                                               | Taichung City |                | 407   | TW |
| Irvin, Marguerite Ryan | University of Alabama                                         |                                               | Birmingham    | Alabama        | 35487 | US |

|                   |                                                                                   |                                                                             |                  |               |       |    |
|-------------------|-----------------------------------------------------------------------------------|-----------------------------------------------------------------------------|------------------|---------------|-------|----|
| Jackson, Rebecca  | Ohio State University<br>Wexner Medical<br>Center                                 | Internal Medicine, Division<br>of Endocrinology, Diabetes<br>and Metabolism | Columbus         | Ohio          | 43210 | US |
| Jain, Deepti      | University of<br>Washington                                                       |                                                                             | Seattle          | Washington    | 98195 | US |
| Jaquish, Cashell  | National Heart, Lung,<br>and Blood Institute,<br>National Institutes of<br>Health |                                                                             | Bethesda         | Maryland      | 20892 | US |
| Jhun, Min A       | University of Michigan                                                            |                                                                             | Ann Arbor        | Michigan      | 48109 | US |
| Johnsen, Jill     | Blood Works<br>Northwest, University<br>of Washington                             |                                                                             | Seattle          | Washington    | 98106 | US |
| Johnson, Andrew   | National Heart, Lung,<br>and Blood Institute,<br>National Institutes of<br>Health |                                                                             | Bethesda         | Maryland      | 20892 | US |
| Johnson, Craig    | University of<br>Washington                                                       |                                                                             | Seattle          | Washington    | 98195 | US |
| Johnston, Rich    | Emory University                                                                  |                                                                             | Atlanta          | Georgia       | 30322 | US |
| Jones, Kimberly   | Johns Hopkins<br>University                                                       |                                                                             | Baltimore        | Maryland      | 21218 | US |
| Kang, Hyun Min    | University of Michigan                                                            | Biostatistics                                                               | Ann Arbor        | Michigan      | 48109 | US |
| Kaplan, Robert    | Albert Einstein<br>College of Medicine                                            |                                                                             | New York         | New York      | 10461 | US |
| Kardia, Sharon    | University of Michigan                                                            |                                                                             | Ann Arbor        | Michigan      | 48109 | US |
| Kathiresan, Sekar | Broad Institute                                                                   |                                                                             | Cambridge        | Massachusetts | 02142 | US |
| Kaufman, Laura    | Brigham & Women's<br>Hospital                                                     |                                                                             | Boston           | Massachusetts | 02115 | US |
| Kelly, Shannon    | Vitalant Research<br>Institute                                                    |                                                                             | San<br>Francisco | California    | 94118 | US |
| Kenny, Eimear     | Icahn School of<br>Medicine at Mount<br>Sinai                                     |                                                                             | New York         | New York      | 10029 | US |
| Kessler, Michael  | University of Maryland                                                            |                                                                             | Baltimore        | Maryland      | 21201 | US |



|                      |                                           |                        |               |               |       |    |
|----------------------|-------------------------------------------|------------------------|---------------|---------------|-------|----|
| Khan, Alyna          | University of Washington                  |                        | Seattle       | Washington    | 98195 | US |
| Kinney, Greg         | University of Colorado at Denver          |                        | Denver        | Colorado      | 80204 | US |
| Konkle, Barbara      | Blood Works Northwest                     |                        | Seattle       | Washington    | 98104 | US |
| Kooperberg, Charles  | Fred Hutchinson Cancer Research Center    |                        | Seattle       | Washington    | 98109 | US |
| Kramer, Holly        | Loyola University                         | Public Health Sciences | Maywood       | Illinois      | 60153 | US |
| Krauter, Stephanie   | University of Washington                  |                        | Seattle       | Washington    | 98195 | US |
| Lange, Christoph     | Harvard School of Public Health           | Biostats               | Boston        | Massachusetts | 02115 | US |
| Lange, Ethan         | University of Colorado at Denver          |                        | Denver        | Colorado      | 80204 | US |
| Lange, Leslie        | University of Colorado at Denver          |                        | Denver        | Colorado      | 80204 | US |
| Laurie, Cathy        | University of Washington                  |                        | Seattle       | Washington    | 98195 | US |
| Laurie, Cecelia      | University of Washington                  |                        | Seattle       | Washington    | 98195 | US |
| LeBoff, Meryl        | Brigham & Women's Hospital                |                        | Boston        | Massachusetts | 02115 | US |
| Lee, Jiwon           | Brigham & Women's Hospital                |                        |               |               |       |    |
| Lee, Seunggeun Shawn | University of Michigan                    |                        | Ann Arbor     | Michigan      | 48109 | US |
| Lee, Wen-Jane        | Taichung Veterans General Hospital Taiwan |                        | Taichung City |               | 407   | TW |
| LeFaive, Jonathon    | University of Michigan                    |                        | Ann Arbor     | Michigan      | 48109 | US |
| Levine, David        | University of Washington                  |                        | Seattle       | Washington    | 98195 | US |

|                  |                                                                          |              |                 |                |       |    |
|------------------|--------------------------------------------------------------------------|--------------|-----------------|----------------|-------|----|
| Levy, Dan        | National Heart, Lung, and Blood Institute, National Institutes of Health |              | Bethesda        | Maryland       | 20892 | US |
| Lewis, Joshua    | University of Maryland                                                   |              | Baltimore       | Maryland       | 21201 | US |
| Li, Yun          | University of North Carolina                                             |              | Chapel Hill     | North Carolina | 27599 | US |
| Lin, Honghuang   | Boston University                                                        |              | Boston          | Massachusetts  | 02215 | US |
| Lin, Keng Han    | University of Michigan                                                   |              | Ann Arbor       | Michigan       | 48109 | US |
| Lin, Xihong      | Harvard School of Public Health                                          |              |                 |                |       |    |
| Liu, Simin       | Brown University, Women's Health Initiative                              | Epidemiology | Providence      | Rhode Island   | 02912 | US |
| Liu, Yongmei     | Wake Forest Baptist Health                                               |              | Winston-Salem   | North Carolina | 27157 | US |
| Loos, Ruth       | Icahn School of Medicine at Mount Sinai                                  |              | New York        | New York       | 10029 | US |
| Lubitz, Steven   | Massachusetts General Hospital                                           |              | Boston          | Massachusetts  | 02114 | US |
| Lunetta, Kathryn | Boston University                                                        |              | Boston          | Massachusetts  | 02215 | US |
| Luo, James       | National Heart, Lung, and Blood Institute, National Institutes of Health |              | Bethesda        | Maryland       | 20892 | US |
| Mahaney, Michael | University of Texas Rio Grande Valley School of Medicine                 |              | Brownsville     | Texas          | 78520 | US |
| Make, Barry      | Johns Hopkins University                                                 |              | Baltimore       | Maryland       | 21218 | US |
| Manichaikul, Ani | University of Virginia                                                   |              | Charlottesville | Virginia       | 22903 | US |
| Manson, JoAnn    | Brigham & Women's Hospital                                               |              | Boston          | Massachusetts  | 02115 | US |
| Margolin, Lauren | Broad Institute                                                          |              | Cambridge       | Massachusetts  | 02142 | US |

|                      |                                                                          |               |            |                      |       |    |
|----------------------|--------------------------------------------------------------------------|---------------|------------|----------------------|-------|----|
| Martin, Lisa         | George Washington University                                             |               | Washington | District of Columbia | 20052 | US |
| Mathai, Susan        | University of Colorado at Denver                                         |               | Denver     | Colorado             | 80204 | US |
| Mathias, Rasika      | Johns Hopkins University                                                 |               | Baltimore  | Maryland             | 21218 | US |
| McArdle, Patrick     | University of Maryland                                                   |               | Baltimore  | Maryland             | 21201 | US |
| McDonald, Merry-Lynn | University of Alabama                                                    |               | Birmingham | Alabama              | 35487 | US |
| McFarland, Sean      | Harvard University                                                       |               | Cambridge  | Massachusetts        | 02138 | US |
| McGarvey, Stephen    | Brown University                                                         |               | Providence | Rhode Island         | 02912 | US |
| McHugh, Caitlin      | University of Washington                                                 | Biostatistics | Seattle    | Washington           | 98145 | US |
| Mei, Hao             | University of Mississippi                                                |               | Jackson    | Mississippi          | 38677 | US |
| Meyers, Deborah A    | University of Arizona                                                    |               | Tucson     | Arizona              | 85721 | US |
| Mikulla, Julie       | National Heart, Lung, and Blood Institute, National Institutes of Health |               | Bethesda   | Maryland             | 20892 | US |
| Min, Nancy           | University of Mississippi                                                |               | Jackson    | Mississippi          | 38677 | US |
| Minear, Mollie       | National Heart, Lung, and Blood Institute, National Institutes of Health |               | Bethesda   | Maryland             | 20892 | US |
| Minster, Ryan L      | University of Pittsburgh                                                 |               | Pittsburgh | Pennsylvania         | 15260 | US |
| Mitchell, Braxton D. | University of Maryland                                                   |               | Baltimore  | Maryland             | 21201 | US |
| Montasser, May E.    | University of Maryland                                                   |               | Baltimore  | Maryland             | 21201 | US |
| Musani, Solomon      | University of Mississippi                                                | Medicine      | Jackson    | Mississippi          | 39213 | US |

|                      |                                                                          |               |                 |                      |       |    |
|----------------------|--------------------------------------------------------------------------|---------------|-----------------|----------------------|-------|----|
| Mwasongwe, Stanford  | University of Mississippi                                                |               | Jackson         | Mississippi          | 38677 | US |
| Mychaleckyj, Josyf C | University of Virginia                                                   |               | Charlottesville | Virginia             | 22903 | US |
| Nadkarni, Girish     | Icahn School of Medicine at Mount Sinai                                  |               | New York        | New York             | 10029 | US |
| Naik, Rakhi          | Johns Hopkins University                                                 |               | Baltimore       | Maryland             | 21218 | US |
| Naseri, Take         | Ministry of Health, Government of Samoa                                  |               | Apia            |                      |       | WS |
| Natarajan, Pradeep   | Broad Institute, Harvard University, Massachusetts General Hospital      |               | Cambridge       | Massachusetts        | 02138 | US |
| Nekhai, Sergei       | Howard University                                                        |               | Washington      | District of Columbia | 20059 | US |
| Nelson, Sarah C.     | University of Washington                                                 | Biostatistics | Seattle         | Washington           | 98195 | US |
| Nickerson, Deborah   | University of Washington                                                 |               | Seattle         | Washington           | 98195 | US |
| North, Kari          | University of North Carolina                                             |               | Chapel Hill     | North Carolina       | 27599 | US |
| O'Connell, Jeff      | University of Maryland                                                   |               | Baltimore       | Maryland             | 21201 | US |
| O'Connor, Tim        | University of Maryland                                                   |               | Baltimore       | Maryland             | 21201 | US |
| Ochs-Balcom, Heather | University at Buffalo                                                    |               | Buffalo         | New York             | 14260 | US |
| Palmer, Nicholette   | Wake Forest Baptist Health                                               | Biochemistry  | Winston-Salem   | North Carolina       | 27157 | US |
| Pankow, James        | University of Minnesota                                                  |               | Minneapolis     | Minnesota            | 55455 | US |
| Papanicolaou, George | National Heart, Lung, and Blood Institute, National Institutes of Health |               | Bethesda        | Maryland             | 20892 | US |

|                         |                                                                  |                     |           |               |       |    |
|-------------------------|------------------------------------------------------------------|---------------------|-----------|---------------|-------|----|
| Parker, Margaret        | Brigham & Women's Hospital                                       |                     | Boston    | Massachusetts | 02115 | US |
| Parsa, Afshin           | University of Maryland                                           |                     | Baltimore | Maryland      | 21201 | US |
| Penchev, Sara           | National Jewish Health                                           |                     | Denver    | Colorado      | 80206 | US |
| Peralta, Juan Manuel    | University of Texas Rio Grande Valley School of Medicine         |                     | Edinburg  | Texas         | 78539 | US |
| Perez, Marco            | Stanford University                                              |                     | Stanford  | California    | 94305 | US |
| Perry, James            | University of Maryland                                           |                     | Baltimore | Maryland      | 21201 | US |
| Peters, Ulrike          | Fred Hutchinson Cancer Research Center, University of Washington |                     | Seattle   | Washington    | 98109 | US |
| Peyser, Patricia        | University of Michigan                                           |                     | Ann Arbor | Michigan      | 48109 | US |
| Phillips, Lawrence S    | Emory University                                                 |                     | Atlanta   | Georgia       | 30322 | US |
| Phillips, Sam           | University of Washington                                         |                     | Seattle   | Washington    | 98195 | US |
| Pollin, Toni            | University of Maryland                                           |                     | Baltimore | Maryland      | 21201 | US |
| Post, Wendy             | Johns Hopkins University                                         | Cardiology/Medicine | Baltimore | Maryland      | 21218 | US |
| Powers Becker, Julia    | University of Colorado at Denver                                 | Medicine            | Denver    | Colorado      | 80204 | US |
| Preethi Boorgula, Meher | University of Colorado at Denver                                 |                     | Denver    | Colorado      | 80204 | US |
| Preuss, Michael         | Icahn School of Medicine at Mount Sinai                          |                     | New York  | New York      | 10029 | US |
| Prokopenko, Dmitry      | Harvard University                                               |                     | Cambridge | Massachusetts | 02138 | US |
| Psaty, Bruce            | University of Washington                                         |                     | Seattle   | Washington    | 98195 | US |
| Qasba, Pankaj           | National Heart, Lung, and Blood Institute,                       |                     | Bethesda  | Maryland      | 20892 | US |

|                              |                                                                  |                                                |                 |                |       |    |
|------------------------------|------------------------------------------------------------------|------------------------------------------------|-----------------|----------------|-------|----|
|                              | National Institutes of Health                                    |                                                |                 |                |       |    |
| Qiao, Dandi                  | Brigham & Women's Hospital                                       |                                                | Boston          | Massachusetts  | 02115 | US |
| Qin, Zhaohui                 | Emory University                                                 |                                                | Atlanta         | Georgia        | 30322 | US |
| Rafaels, Nicholas            | University of Colorado at Denver                                 |                                                | Denver          | Colorado       | 80045 | US |
| Raffield, Laura              | University of North Carolina                                     | Genetics                                       | Chapel Hill     | North Carolina | 27599 | US |
| Rao, D.C.                    | Washington University in St Louis                                |                                                | St Louis        | Missouri       | 63130 | US |
| Rasmussen-Torvik, Laura      | Northwestern University                                          |                                                | Chicago         | Illinois       | 60208 | US |
| Ratan, Aakrosh               | University of Virginia                                           |                                                | Charlottesville | Virginia       | 22903 | US |
| Redline, Susan               | Brigham & Women's Hospital                                       |                                                | Boston          | Massachusetts  | 02115 | US |
| Reed, Robert                 | University of Maryland                                           |                                                | Baltimore       | Maryland       | 21201 | US |
| Regan, Elizabeth             | National Jewish Health                                           |                                                | Denver          | Colorado       | 80206 | US |
| Reiner, Alex                 | Fred Hutchinson Cancer Research Center, University of Washington |                                                | Seattle         | Washington     | 98109 | US |
| Reupena, Muagututi'a Sefuiva | Lutia I Puava Ae Mapu I Fagalele                                 |                                                | Apia            |                |       | WS |
| Rice, Ken                    | University of Washington                                         |                                                | Seattle         | Washington     | 98195 | US |
| Rich, Stephen                | University of Virginia                                           |                                                | Charlottesville | Virginia       | 22903 | US |
| Roden, Dan                   | Vanderbilt University                                            | Medicine, Pharmacology, Biomedical Informatics | Nashville       | Tennessee      | 37235 | US |
| Roselli, Carolina            | Broad Institute                                                  |                                                | Cambridge       | Massachusetts  | 02142 | US |
| Rotter, Jerome               | Los Angeles Biomedical Research Institute                        |                                                | Los Angeles     | California     | 90502 | US |

|                          |                                           |                       |            |               |          |    |
|--------------------------|-------------------------------------------|-----------------------|------------|---------------|----------|----|
| Ruczinski, Ingo          | Johns Hopkins University                  |                       | Baltimore  | Maryland      | 21218    | US |
| Russell, Pamela          | University of Colorado at Denver          |                       | Denver     | Colorado      | 80204    | US |
| Ruuska, Sarah            | Blood Works Northwest                     |                       | Seattle    | Washington    | 98107    | US |
| Ryan, Kathleen           | University of Maryland                    |                       | Baltimore  | Maryland      | 21201    | US |
| Sabino, Ester Cerdeira   | Universidade de Sao Paulo                 | Faculdade de Medicina | Sao Paulo  |               | 01310000 | BR |
| Sakornsakolpat, Phuwanat | Brigham & Women's Hospital                |                       | Boston     | Massachusetts | 02115    | US |
| Salimi, Shabnam          | University of Maryland                    |                       | Baltimore  | Maryland      | 21201    | US |
| Salzberg, Steven         | Johns Hopkins University                  |                       | Baltimore  | Maryland      | 21218    | US |
| Sandow, Kevin            | Los Angeles Biomedical Research Institute | TGPS                  | Torrance   | California    | 90502    | US |
| Sankaran, Vijay          | Harvard University                        |                       | Cambridge  | Massachusetts | 02138    | US |
| Scheller, Christopher    | University of Michigan                    |                       | Ann Arbor  | Michigan      | 48109    | US |
| Schmidt, Ellen           | University of Michigan                    |                       | Ann Arbor  | Michigan      | 48109    | US |
| Schwander, Karen         | Washington University in St Louis         |                       | St Louis   | Missouri      | 63130    | US |
| Schwartz, David          | University of Colorado at Denver          |                       | Denver     | Colorado      | 80204    | US |
| Sciurba, Frank           | University of Pittsburgh                  |                       | Pittsburgh | Pennsylvania  | 15260    | US |
| Seidman, Christine       | Harvard Medical School                    | Genetics              | Boston     | Massachusetts | 02115    | US |
| Seidman, Jonathan        | Harvard Medical School                    |                       |            |               |          |    |
| Sheehan, Vivien          | Baylor College of Medicine                | Pediatrics            | Houston    | Texas         | 77030    | US |
| Shetty, Amol             | University of Maryland                    |                       | Baltimore  | Maryland      | 21201    | US |
| Shetty, Aniket           | University of Colorado at Denver          |                       | Denver     | Colorado      | 80204    | US |

|                        |                                              |                         |               |                |       |    |
|------------------------|----------------------------------------------|-------------------------|---------------|----------------|-------|----|
| Sheu, Wayne Hui-Heng   | Taichung Veterans General Hospital<br>Taiwan |                         | Taichung City |                | 407   | TW |
| Shoemaker, M. Benjamin | Vanderbilt University                        |                         | Nashville     | Tennessee      | 37235 | US |
| Silver, Brian          | UMass Memorial Medical Center                |                         | Worcester     | Massachusetts  | 01655 | US |
| Silverman, Edwin       | Brigham & Women's Hospital                   |                         | Boston        | Massachusetts  | 02115 | US |
| Smith, Jennifer        | University of Michigan                       |                         | Ann Arbor     | Michigan       | 48109 | US |
| Smith, Josh            | University of Washington                     |                         | Seattle       | Washington     | 98195 | US |
| Smith, Nicholas        | University of Washington                     |                         | Seattle       | Washington     | 98195 | US |
| Smith, Tanja           | New York Genome Center                       |                         | New York      | New York       | 10013 | US |
| Smoller, Sylvia        | Albert Einstein College of Medicine          |                         | New York      | New York       | 10461 | US |
| Snively, Beverly       | Wake Forest Baptist Health                   | Biostatistical Sciences | Winston-Salem | North Carolina | 27157 | US |
| Sofer, Tamar           | Brigham & Women's Hospital                   |                         | Boston        | Massachusetts  | 02115 | US |
| Sotoodehnia, Nona      | University of Washington                     |                         | Seattle       | Washington     | 98195 | US |
| Stilp, Adrienne        | University of Washington                     |                         | Seattle       | Washington     | 98195 | US |
| Streeten, Elizabeth    | University of Maryland                       |                         | Baltimore     | Maryland       | 21201 | US |
| Su, Jessica Lasky      | Brigham & Women's Hospital                   |                         |               |                |       |    |
| Sung, Yun Ju           | Washington University in St Louis            |                         | St Louis      | Missouri       | 63130 | US |
| Sylvia, Jody           | Brigham & Women's Hospital                   |                         | Boston        | Massachusetts  | 02115 | US |
| Szpiro, Adam           | University of Washington                     |                         | Seattle       | Washington     | 98195 | US |



|                        |                                                            |                                                               |             |                |       |    |
|------------------------|------------------------------------------------------------|---------------------------------------------------------------|-------------|----------------|-------|----|
| Sztalryd, Carole       | University of Maryland                                     |                                                               | Baltimore   | Maryland       | 21201 | US |
| Taliun, Daniel         | University of Michigan                                     |                                                               | Ann Arbor   | Michigan       | 48109 | US |
| Tang, Hua              | Stanford University                                        | Genetics                                                      | Stanford    | California     | 94305 | US |
| Taub, Margaret         | Johns Hopkins University                                   |                                                               | Baltimore   | Maryland       | 21218 | US |
| Taylor, Kent D.        | Los Angeles Biomedical Research Institute                  | Institute for Translational Genomics and Populations Sciences | Torrance    | California     | 90502 | US |
| Taylor, Simeon         | University of Maryland                                     |                                                               | Baltimore   | Maryland       | 21201 | US |
| Telen, Marilyn         | Duke University                                            |                                                               | Durham      | North Carolina | 27708 | US |
| Thornton, Timothy A.   | University of Washington                                   |                                                               | Seattle     | Washington     | 98195 | US |
| Tinker, Lesley         | Women's Health Initiative                                  |                                                               | Seattle     | Washington     | 98109 | US |
| Tirschwell, David      | University of Washington                                   |                                                               | Seattle     | Washington     | 98195 | US |
| Tiwari, Hemant         | University of Alabama                                      |                                                               | Birmingham  | Alabama        | 35487 | US |
| Tracy, Russell         | University of Vermont                                      | Pathology & Laboratory Medicine                               | Burlington  | Vermont        | 05405 | US |
| Tsai, Michael          | University of Minnesota                                    |                                                               | Minneapolis | Minnesota      | 55455 | US |
| Vaidya, Dhananjay      | Johns Hopkins University                                   |                                                               | Baltimore   | Maryland       | 21218 | US |
| VandeHaar, Peter       | University of Michigan                                     |                                                               | Ann Arbor   | Michigan       | 48109 | US |
| Vasan, Ramachandran S. | Boston University                                          |                                                               | Boston      | Massachusetts  | 02215 | US |
| Vrieze, Scott          | University of Colorado at Boulder, University of Minnesota |                                                               | Boulder     | Colorado       | 80309 | US |
| Walker, Tarik          | University of Colorado at Denver                           |                                                               | Denver      | Colorado       | 80204 | US |
| Wallace, Robert        | University of Iowa                                         |                                                               | Iowa City   | Iowa           | 52242 | US |
| Walts, Avram           | University of Colorado at Denver                           |                                                               | Denver      | Colorado       | 80204 | US |

|                    |                                          |                                         |             |               |       |    |
|--------------------|------------------------------------------|-----------------------------------------|-------------|---------------|-------|----|
| Wan, Emily         | Brigham & Women's Hospital               |                                         | Boston      | Massachusetts | 02115 | US |
| Wang, Fei Fei      | University of Washington                 |                                         | Seattle     | Washington    | 98195 | US |
| Wang, Heming       | Brigham & Women's Hospital, Partners.org |                                         |             |               |       |    |
| Watson, Karol      | University of California, Los Angeles    |                                         | Los Angeles | California    | 90095 | US |
| Weeks, Daniel E.   | University of Pittsburgh                 |                                         | Pittsburgh  | Pennsylvania  | 15260 | US |
| Weir, Bruce        | University of Washington                 |                                         | Seattle     | Washington    | 98195 | US |
| Weiss, Scott       | Brigham & Women's Hospital               |                                         | Boston      | Massachusetts | 02115 | US |
| Weng, Lu-Chen      | Massachusetts General Hospital           |                                         | Boston      | Massachusetts | 02114 | US |
| Willer, Cristen    | University of Michigan                   | Internal Medicine                       | Ann Arbor   | Michigan      | 48109 | US |
| Williams, Kayleen  | University of Washington                 |                                         | Seattle     | Washington    | 98195 | US |
| Williams, L. Keoki | Henry Ford Health System                 |                                         | Detroit     | Michigan      | 48202 | US |
| Wilson, Carla      | Brigham & Women's Hospital               |                                         | Boston      | Massachusetts | 02115 | US |
| Wilson, James      | University of Mississippi                | Department of Physiology and Biophysics | Jackson     | Mississippi   | 39216 | US |
| Wong, Quenna       | University of Washington                 |                                         | Seattle     | Washington    | 98195 | US |
| Xu, Huichun        | University of Maryland                   |                                         | Baltimore   | Maryland      | 21201 | US |
| Yanek, Lisa        | Johns Hopkins University                 |                                         | Baltimore   | Maryland      | 21218 | US |
| Yang, Ivana        | University of Colorado at Denver         |                                         | Denver      | Colorado      | 80204 | US |
| Yang, Rongze       | University of Maryland                   |                                         | Baltimore   | Maryland      | 21201 | US |
| Zaghloul, Norann   | University of Maryland                   |                                         | Baltimore   | Maryland      | 21201 | US |
| Zekavat, Maryam    | Broad Institute                          |                                         | Cambridge   | Massachusetts | 02142 | US |

|                     |                                       |                                                           |            |              |       |    |
|---------------------|---------------------------------------|-----------------------------------------------------------|------------|--------------|-------|----|
| Zhang, Yingze       | University of Pittsburgh              | Medicine                                                  | Pittsburgh | Pennsylvania | 15260 | US |
| Zhao, Snow Xueyan   | National Jewish Health                |                                                           | Denver     | Colorado     | 80206 | US |
| Zhao, Wei           | University of Michigan                |                                                           | Ann Arbor  | Michigan     | 48109 | US |
| Zhi, Degui          | University of Texas Health at Houston |                                                           | Houston    | Texas        | 77225 | US |
| Zhou, Xiang         | University of Michigan                |                                                           | Ann Arbor  | Michigan     | 48109 | US |
| Zhu, Xiaofeng       | Case Western Reserve University       | Department of Population and Quantitative Health Sciences | Cleveland  | Ohio         | 44106 | US |
| Zody, Michael       | New York Genome Center                |                                                           | New York   | New York     | 10013 | US |
| Zoellner, Sebastian | University of Michigan                |                                                           | Ann Arbor  | Michigan     | 48109 | US |

### TOPMed Inflammation Working Group

Stella Aslibekyan  
 Paul Auer  
 David Beame  
 Ferdouse Begum  
 Emelia Benjamin  
 Joshua Bis  
 Michael Bowers  
 Russell Bowler  
 Erin Buth  
 Brian Cade  
 Adolfo Correa  
 Jeffrey Curtis  
 Margaret Mengmeng Du  
 Josee Dupuis  
 Jon Peter Durda  
 Nauder Faraday  
 Ervin Fox  
 Sheila Gaynor

Rebecca Jackson  
Min A Jhun  
Anne Justice  
Brian Kral  
Martin Larson  
David Levine  
Honghuang Lin  
Xihong Lin  
Merry-Lynn McDonald  
John McLenithan  
Michael Mendelson  
Julie Mikulla  
Nancy Min  
Joanne Murabito  
Nels Olson  
Nathan Pankratz  
Ulrike Peters  
Linda Polfus  
Bruce Psaty  
Jenn Purnell  
Laura Raffield  
Deepa Rastogi  
Elizabeth Regan  
Alex Reiner  
Annabelle Rodriguez  
Ester Cerdeira Sabino  
Shabnam Salimi  
Cassie Spracklen  
Ryan Sun  
Russell Tracy  
Dhananjay Vaidya  
Biqi Becky Wang  
Fei Fei Wang  
Kate Wehr  
James Wilson  
Lue Ping Zhao
